# Supplementary material for: Iodine-catalyzed efficient synthesis of xanthene/thioxanthene-indole derivatives under mild conditions
Source: PubMed Central journal article supplement — RSC Adv. 2020 Jul 2;10(42):25165–9. doi: 10.1039/d0ra05217e (PMC9055358; doi:10.1039/d0ra05217e), 2020-07-02

## Supplementary Data

### Iodine-catalyzed efficient synthesis of xanthene/thioxanthene-indole derivatives under mild conditions

Weihang Miu,<sup>a</sup> Pingting Ye,<sup>a</sup> Mengjiao Bai,<sup>a</sup> Zhixin Yang,<sup>a</sup> Suyue Duan,<sup>a</sup> Hengpan  
Duan<sup>b</sup> and Xuequan Wang<sup>\*a</sup>

<sup>a</sup> Key Laboratory of Natural Pharmaceutical and Chemical Biology of Yunnan Province, School of Science, Honghe University, Mengzi, Yunnan 661100, China.

<sup>b</sup> International Academy of Targeted Therapeutics and Innovation, School of Pharmacy, Chongqing University of Arts and Sciences, Chongqing, 402160, China.

\* E-mail: huolixuanfeng@126.com (X.-Q. Wang).

#### TABLE OF CONTENTS

|                                                                          |         |
|--------------------------------------------------------------------------|---------|
| 1. General Experimental.....                                             | S2      |
| 2. Experimental Procedures and Analytical Data.....                      | S3-S23  |
| 3. <sup>1</sup> H-NMR and <sup>13</sup> C-NMR Spectral of Compounds..... | S24-S70 |

## 1. General Experimental

Melting points were determined on XT-4A melting-point apparatus and were uncorrected. The NMR spectra were recorded on a Bruker Avance 400 ( $^1\text{H}$ : 400 MHz,  $^{13}\text{C}$ :100 MHz) spectrometer. HRMS were taken on AB QSTAR Pulsar mass spectrometer. The infrared (IR) spectra were acquired as thin films on a FT-IR spectrometer. Silica gel (200–300 mesh) for column chromatography and silica GF<sub>254</sub> for TLC were produced by Qingdao Marine Chemical Company (China). Starting materials and reagents used in the reactions were obtained from Acros, Aldrich, Adamas and Bidepharm without further purification.

## 2. Experimental Procedures and Analytical Data

### 2.1 General procedure for the reaction of alcohols with nucleophiles

To a stirred solution of alcohol (1.0 mmol) and nucleophile (1.0 mmol) in EtOH (5 mL) at room temperature, I<sub>2</sub> (5 mol%) was added rapidly. Then being stirred at rt until complete consumption of starting material as monitored by TLC, the reaction mixture was quenched by the addition of saturated aq Na<sub>2</sub>S<sub>2</sub>O<sub>3</sub> (1 mL) and evaporated in vacuum. The residue was extracted with ethyl acetate (3×5 mL), and the combined extract was dried over anhydrous Na<sub>2</sub>SO<sub>4</sub>, filtered and concentrated under vacuum. The crude product was chromatographed on silica gel using petroleum ether/ethyl acetate as an eluent or purified by recrystallization from petroleum ether and ethyl acetate to afford the desired products.

### 2.2 Spectroscopic data of the products of nucleophilic substitution

#### 3-(9*H*-xanthen-9-yl)-1*H*-indole (4aa)

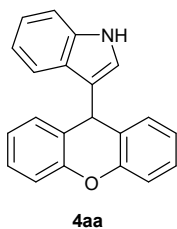

Yield 87%; White solid; Mp 148-149 °C; IR (KBr): 3425, 3052, 1599, 1481, 1446, 1312, 1258, 1096, 901, 756 cm<sup>-1</sup>; <sup>1</sup>H NMR (400 MHz, CDCl<sub>3</sub>): δ 7.92 (s, 1H), 7.35 (d, *J* = 8.0 Hz, 1H), 7.30 (d, *J* = 8.0 Hz, 1H), 7.18 (dd, *J* = 8.8, 1.6 Hz, 1H), 7.15-7.07 (m, 6H), 7.03 (d, *J* = 2.4 Hz, 1H), 6.97-6.94 (m, 1H), 6.92-6.88 (m, 2H), 5.53 (s, 1H); <sup>13</sup>C NMR (100 MHz, CDCl<sub>3</sub>): δ 151.33, 136.75, 129.50, 127.73, 125.84, 124.44, 123.13, 122.83, 122.17, 120.38, 119.72, 119.65, 116.35, 111.25, 35.53; HRMS (ESI-TOF): *m/z* calcd for C<sub>21</sub>H<sub>15</sub>NONa [M+Na]<sup>+</sup>: 320.1046, found: 320.1047.

#### 6-methyl-3-(9*H*-xanthen-9-yl)-1*H*-indole (4ab)

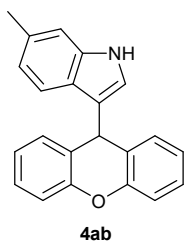

Yield 82%; Green solid; Mp 119-120 °C; IR (KBr): 3382, 3039, 2860, 1600, 1574, 1450, 1396, 1333, 1320, 1118, 1036, 903, 858, 765, 686, 512  $\text{cm}^{-1}$ ;  $^1\text{H}$  NMR (400 MHz,  $\text{CDCl}_3$ ):  $\delta$  7.78 (s, 1H), 7.23-7.10 (m, 8H), 7.01-6.96 (m, 1H), 6.95-6.89 (m, 2H), 6.84-6.79 (m, 1H), 5.52-5.50 (m, 1H), 2.42-2.39 (m, 3H);  $^{13}\text{C}$  NMR (100 MHz,  $\text{CDCl}_3$ ):  $\delta$  151.36, 137.27, 132.01, 129.53, 127.71, 124.53, 123.69, 123.15, 122.28, 121.43, 120.08, 119.39, 116.33, 111.27, 35.58, 21.72; HRMS (ESI-TOF):  $m/z$  calcd for  $\text{C}_{22}\text{H}_{17}\text{NONa}$   $[\text{M}+\text{Na}]^+$ : 334.1202, found: 334.1204.

#### 7-methyl-3-(9H-xanthen-9-yl)-1H-indole (4ac)

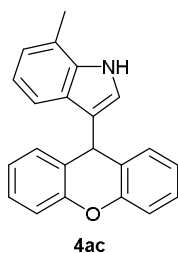

Yield 84%; White solid; Mp 192-193 °C; IR (KBr): 3428, 3054, 2853, 1601, 1573, 1481, 1446, 1430, 1316, 1255, 1088, 902, 809, 750, 696  $\text{cm}^{-1}$ ;  $^1\text{H}$  NMR (400 MHz,  $\text{CDCl}_3$ ):  $\delta$  7.90 (s, 1H), 7.22-7.07 (m, 8H), 6.94-6.87 (m, 4H), 5.53 (s, 1H), 2.44 (s, 3H);  $^{13}\text{C}$  NMR (100 MHz,  $\text{CDCl}_3$ ):  $\delta$  151.30, 136.31, 129.49, 127.67, 125.39, 124.47, 123.10, 122.72, 122.54, 120.93, 120.35, 119.87, 117.46, 116.31, 35.59, 16.64; HRMS (ESI-TOF):  $m/z$  calcd for  $\text{C}_{22}\text{H}_{17}\text{NONa}$   $[\text{M}+\text{Na}]^+$ : 334.1202, found: 334.1203.

#### 6-fluoro-3-(9H-xanthen-9-yl)-1H-indole (4ad)

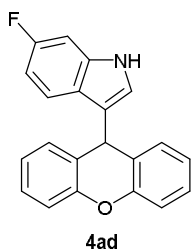

Yield 97%; White solid; Mp 130-132 °C; IR (KBr): 3441, 3057, 1627, 1573, 1482, 1452, 1313, 1258, 1140, 1117, 1090, 847, 752  $\text{cm}^{-1}$ ;  $^1\text{H}$  NMR (400 MHz,  $\text{CDCl}_3$ ):  $\delta$  7.96 (s, 1H), 7.21-7.17 (m, 3H), 7.14 (dd,  $J = 8.0, 0.8$  Hz, 2H), 7.08-7.07 (m, 3H), 6.97 (dd,  $J = 9.6, 2.4$  Hz, 1H), 6.94-6.90 (m, 2H), 6.72-6.67 (m, 1H), 5.49 (s, 1H);  $^{13}\text{C}$  NMR (100 MHz,  $\text{CDCl}_3$ ):  $\delta$  159.97 (d,  $J = 236.7$  Hz), 151.28, 136.79 (d,  $J = 12.3$  Hz), 129.39,



127.85, 124.08, 123.15, 122.95 (d,  $J = 3.5$  Hz), 122.28, 120.50 (d,  $J = 9.9$  Hz), 120.34, 116.41, 108.47 (d,  $J = 24.3$  Hz), 97.54 (d,  $J = 25.8$  Hz), 35.56; HRMS (ESI-TOF):  $m/z$  calcd for  $C_{21}H_{13}FNO$   $[M-H]^-$ : 314.0987, found: 314.0989.

#### 6-chloro-3-(9H-xanthen-9-yl)-1H-indole (4ae)

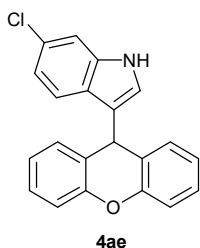

Yield 92%; White solid; Mp 151-152 °C; IR (KBr): 3432, 3064, 1599, 1572, 1474, 1447, 1307, 1250, 1093, 904, 798, 756  $cm^{-1}$ ;  $^1H$  NMR (400 MHz,  $CDCl_3$ ):  $\delta$  7.85 (s, 1H), 7.23 (s, 1H), 7.17-7.11 (m, 5H), 7.05-7.02 (m, 3H), 6.91-6.88 (m, 3H), 5.46 (s, 1H);  $^{13}C$  NMR (100 MHz,  $CDCl_3$ ):  $\delta$  151.28, 137.17, 129.40, 128.18, 127.93, 124.33, 124.03, 123.37, 123.22, 120.60, 120.45, 116.46, 111.22, 35.49; HRMS (ESI-TOF):  $m/z$  calcd for  $C_{21}H_{13}ClNO$   $[M-H]^-$ : 330.0691, found: 330.0694.

#### Methyl 3-(9H-xanthen-9-yl)-1H-indole-5-carboxylate (4af)

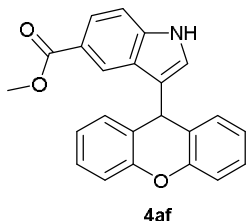

Yield 98%; Yellow solid; Mp 193-194 °C; IR (KBr): 3298, 2946, 2842, 1691, 1613, 1574, 1480, 1447, 1368, 1281, 1243, 1219, 1117, 902, 747  $cm^{-1}$ ;  $^1H$  NMR (400 MHz,  $CDCl_3$ ):  $\delta$  8.29 (t,  $J = 0.8$  Hz, 2H), 7.86 (dd,  $J = 8.8, 1.6$  Hz, 1H), 7.33 (dd,  $J = 8.8, 0.8$  Hz, 1H), 7.22-7.18 (m, 2H), 7.17-7.12 (m, 4H), 7.01 (d,  $J = 2.0$  Hz, 1H), 6.96-6.92 (m, 2H), 5.61 (s, 1H), 3.89 (s, 3H);  $^{13}C$  NMR (100 MHz,  $CDCl_3$ ):  $\delta$  168.09, 151.36, 139.05, 129.23, 127.86, 125.69, 124.40, 124.19, 123.60, 123.19, 122.35, 121.87, 116.53, 110.98, 51.93, 35.23; HRMS (ESI-TOF):  $m/z$  calcd for  $C_{23}H_{17}NO_3Na$   $[M+Na]^+$ : 378.1101, found: 378.1103.

### 5-nitro-3-(9*H*-xanthen-9-yl)-1*H*-indole (4ag)

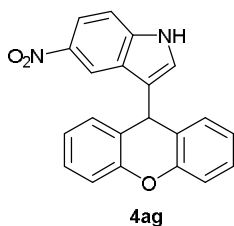

Yield 81%; Brown solid; Mp 234-235 °C; IR (KBr): 3334, 1601, 1460, 1448, 1325, 1290, 1254, 1093, 1040, 899, 749, 739  $\text{cm}^{-1}$ ;  $^1\text{H}$  NMR (400 MHz,  $\text{DMSO-}d_6$ ):  $\delta$  11.81 (s, 1H), 8.15 (s, 1H), 7.93 (t,  $J = 8.8$  Hz, 1H), 7.67 (s, 1H), 7.53 (d,  $J = 9.2$  Hz, 1H), 7.25 (s, 4H), 7.19 (d,  $J = 7.2$  Hz, 2H), 7.03-7.00 (m, 2H), 5.78 (s, 1H);  $^{13}\text{C}$  NMR (100 MHz,  $\text{CDCl}_3$ ):  $\delta$  151.03, 140.71, 140.38, 130.04, 128.57, 127.76, 124.78, 124.34, 123.92, 122.57, 117.07, 116.65, 116.05, 112.70, 34.81; HRMS (ESI-TOF):  $m/z$  calcd for  $\text{C}_{21}\text{H}_{14}\text{N}_2\text{O}_3\text{Na}$   $[\text{M}+\text{Na}]^+$ : 365.0897, found: 365.0898.

### 5-methoxy-3-(9*H*-xanthen-9-yl)-1*H*-indole (4ah)

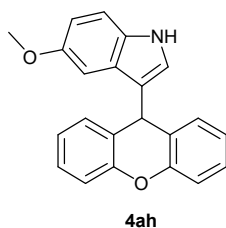

Yield 85%; White solid; Mp 179-180 °C; IR (KBr): 3332, 2831, 1578, 1479, 1465, 1322, 1254, 1211, 1172, 1064, 1029, 903, 837, 747  $\text{cm}^{-1}$ ;  $^1\text{H}$  NMR (400 MHz,  $\text{CDCl}_3$ ):  $\delta$  7.89 (s, 1H), 7.22-7.16 (m, 3H), 7.14-7.12 (m, 4H), 7.08 (d,  $J = 2.4$  Hz, 1H), 6.95-6.91 (m, 2H), 6.79-6.77 (m, 2H), 5.51 (s, 1H), 3.68 (s, 3H);  $^{13}\text{C}$  NMR (100 MHz,  $\text{CDCl}_3$ ):  $\delta$  153.83, 151.34, 131.84, 129.50, 127.70, 126.33, 124.32, 123.30, 123.12, 120.34, 116.26, 112.14, 111.83, 101.48, 55.69, 35.53; HRMS (ESI-TOF):  $m/z$  calcd for  $\text{C}_{22}\text{H}_{17}\text{NO}_2\text{Na}$   $[\text{M}+\text{Na}]^+$ : 350.1151, found: 350.1148.

### 2-methyl-3-(9*H*-xanthen-9-yl)-1*H*-indole (4ai)

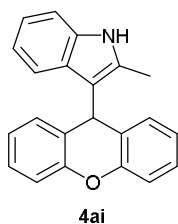

Yield 92%; Yellow solid; Mp 194-195 °C; IR (KBr): 3411, 3044, 2916, 1602, 1572, 1480, 1449, 1302, 1255, 1117, 1096, 902, 744, 595  $\text{cm}^{-1}$ ;  $^1\text{H}$  NMR (400 MHz,  $\text{CDCl}_3$ ):  $\delta$  7.81 (s, 1H), 7.26 (d,  $J = 8.4$  Hz, 1H), 7.19-7.11 (m, 5H), 7.09-7.04 (m, 1H), 6.97-6.93 (m, 2H), 6.91-6.86 (m, 3H), 5.61 (s, 1H), 2.36 (d,  $J = 1.6$  Hz, 3H);  $^{13}\text{C}$  NMR (100 MHz,  $\text{CDCl}_3$ ):  $\delta$  151.29, 135.34, 132.29, 129.40, 127.62, 124.11, 123.06, 121.15, 119.47, 118.87, 116.15, 115.19, 110.23, 33.70, 12.04; HRMS (ESI-TOF):  $m/z$  calcd for  $\text{C}_{22}\text{H}_{17}\text{NONa}$   $[\text{M}+\text{Na}]^+$ : 334.1202, found: 334.1200.

### 2-phenyl-3-(9H-xanthen-9-yl)-1H-indole (4aj)

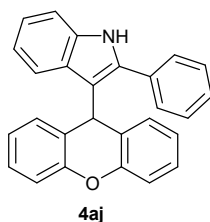

Yield 86%; Green solid; Mp 234-236 °C; IR (KBr): 3392, 3022, 1570, 1457, 1447, 1314, 1250, 1094, 898, 747, 696  $\text{cm}^{-1}$ ;  $^1\text{H}$  NMR (400 MHz,  $\text{CDCl}_3$ ):  $\delta$  8.16 (s, 1H), 7.65-7.63 (m, 2H), 7.49-7.45 (m, 2H), 7.42-7.37 (m, 2H), 7.19-7.15 (m, 2H), 7.13-7.10 (m, 3H), 7.01-6.95 (m, 3H), 6.88-6.82 (m, 3H), 5.77 (s, 1H);  $^{13}\text{C}$  NMR (100 MHz,  $\text{CDCl}_3$ ):  $\delta$  151.52, 137.18, 136.51, 132.66, 129.12, 129.03, 128.42, 128.39, 127.67, 126.93, 124.24, 123.08, 122.37, 120.96, 119.80, 116.16, 114.02, 110.82, 34.08; HRMS (ESI-TOF):  $m/z$  calcd for  $\text{C}_{27}\text{H}_{19}\text{NONa}$   $[\text{M}+\text{Na}]^+$ : 396.1359, found: 396.1357.

### Methyl 3-(9H-xanthen-9-yl)-1H-indole-2-carboxylate (4ak)

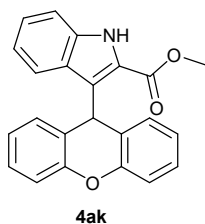

Yield 90%; White solid; Mp 213-214 °C; IR (KBr): 3342, 1685, 1576, 1539, 1460, 1449, 1321, 1251, 1198, 1093, 902, 746  $\text{cm}^{-1}$ ;  $^1\text{H}$  NMR (400 MHz,  $\text{CDCl}_3$ ):  $\delta$  8.98 (s, 1H), 7.32 (d,  $J = 8.0$  Hz, 1H), 7.22-7.11 (m, 6H), 6.98 (d,  $J = 6.8$  Hz, 2H), 6.87-6.83 (m, 3H), 6.58 (s, 1H), 3.98 (s, 3H);  $^{13}\text{C}$  NMR (100 MHz,  $\text{CDCl}_3$ ):  $\delta$  162.99, 150.90, 136.44, 129.65, 127.90, 127.00, 125.71, 123.41, 123.35, 123.10, 122.20, 120.57, 116.30, 111.85,

52.15, 33.62; HRMS (ESI-TOF):  $m/z$  calcd for  $C_{23}H_{17}NO_3Na$   $[M+Na]^+$ : 378.1101, found: 378.1102.

**1-methyl-3-(9H-xanthen-9-yl)-1H-indole (4al)**

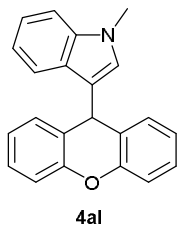

Yield 92%; Green solid; Mp 154-155 °C; IR (KBr): 3455, 3044, 2930, 2826, 1600, 1573, 1447, 1329, 1310, 1250, 1094, 896, 747, 679  $cm^{-1}$ ;  $^1H$  NMR (400 MHz,  $CDCl_3$ ):  $\delta$  7.43-7.40 (m, 1H), 7.27-7.23 (m, 1H), 7.20-7.13 (m, 7H), 7.01-6.96 (m, 1H), 6.94-6.90 (m, 2H), 6.90-6.88 (m, 1H), 5.53 (d,  $J = 3.2$  Hz, 1H), 3.71 (d,  $J = 1.2$  Hz, 3H);  $^{13}C$  NMR (100 MHz,  $CDCl_3$ ):  $\delta$  151.31, 137.38, 129.53, 127.64, 127.63, 127.48, 126.35, 124.77, 123.12, 121.67, 119.65, 119.19, 119.13, 116.34, 116.33, 109.34, 35.40, 32.76; HRMS (ESI-TOF):  $m/z$  calcd for  $C_{22}H_{17}NONa$   $[M+Na]^+$ : 334.1202, found: 334.1202.

**5-bromo-1-methyl-3-(9H-xanthen-9-yl)-1H-indole (4am)**

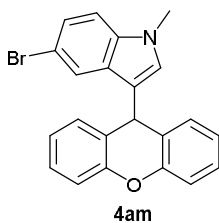

Yield 98%; White solid; Mp 178-180 °C; IR (KBr): 3447, 3059, 2917, 1599, 1571, 1445, 1421, 1377, 1294, 1213, 1148, 902, 790, 748, 647  $cm^{-1}$ ;  $^1H$  NMR (400 MHz,  $CDCl_3$ ):  $\delta$  7.53 (t,  $J = 1.6$  Hz, 1H), 7.23-7.16 (m, 3H), 7.14-7.12 (m, 2H), 7.08 (d,  $J = 8.4$  Hz, 3H), 6.94-6.90 (m, 2H), 6.81 (s, 1H), 5.45 (s, 1H), 3.64 (t,  $J = 2.0$  Hz, 3H);  $^{13}C$  NMR (100 MHz,  $CDCl_3$ ):  $\delta$  151.29, 135.99, 129.31, 128.73, 127.97, 127.85, 124.60, 124.43, 123.22, 121.97, 118.91, 116.51, 112.68, 110.91, 35.22, 32.93; HRMS (ESI-TOF):  $m/z$  calcd for  $C_{22}H_{16}BrNONa$   $[M+Na]^+$ : 412.0307, found: 412.0304.

**6-methyl-3-(2-methyl-9H-xanthen-9-yl)-1H-indole (4bb)**

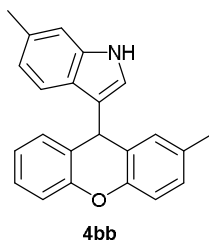

Yield 93%; Yellow solid; Mp 58-59 °C; IR (KBr): 3415, 1700, 1653, 1618, 1481, 1453, 1255, 1139, 1102, 799, 753  $\text{cm}^{-1}$ ;  $^1\text{H}$  NMR (400 MHz,  $\text{CDCl}_3$ ):  $\delta$  7.81 (s, 1H), 7.28-7.23 (m, 1H), 7.18-7.06 (m, 5H), 7.00-6.97 (m, 2H), 6.93-6.89 (m, 2H), 6.83 (d,  $J = 8.4$  Hz, 1H), 5.46 (d,  $J = 6.8$  Hz, 1H), 2.41-2.38 (m, 3H), 2.17-2.15 (m, 3H);  $^{13}\text{C}$  NMR (100 MHz,  $\text{CDCl}_3$ ):  $\delta$  151.38, 149.17, 137.23, 132.40, 131.95, 129.81, 129.63, 128.44, 127.63, 124.51, 124.01, 123.73, 122.95, 122.05, 121.39, 120.56, 119.34, 116.29, 116.04, 111.25, 35.60, 21.73, 20.81; HRMS (ESI-TOF):  $m/z$  calcd for  $\text{C}_{23}\text{H}_{18}\text{NO}$   $[\text{M}-\text{H}]^-$ : 324.1394, found: 324.1395.

### 3-(2-methoxy-9H-xanthen-9-yl)-1H-indole (4ca)

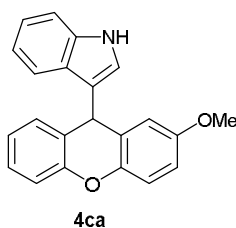

Yield 91%; Yellow solid; Mp 150-151 °C; IR (KBr): 3430, 2834, 1598, 1481, 1455, 1350, 1315, 1239, 1202, 1040, 945, 810, 747  $\text{cm}^{-1}$ ;  $^1\text{H}$  NMR (400 MHz,  $\text{CDCl}_3$ ):  $\delta$  7.99 (s, 1H), 7.37 (d,  $J = 8.0$  Hz, 1H), 7.32 (dd,  $J = 8.0, 0.4$  Hz, 1H), 7.17-7.06 (m, 6H), 6.99-6.95 (m, 1H), 6.92-6.88 (m, 1H), 6.76-6.73 (m, 1H), 6.65 (s, 1H), 5.51 (s, 1H), 3.63 (s, 3H);  $^{13}\text{C}$  NMR (100 MHz,  $\text{CDCl}_3$ ):  $\delta$  155.20, 151.48, 145.48, 136.74, 129.48, 127.67, 125.81, 125.17, 123.87, 122.86, 122.65, 122.15, 120.36, 119.66, 119.64, 116.99, 116.26, 113.96, 113.44, 111.21, 55.56, 35.97; HRMS (ESI-TOF):  $m/z$  calcd for  $\text{C}_{22}\text{H}_{16}\text{NO}_2$   $[\text{M}-\text{H}]^-$ : 326.1187, found: 326.1188.

### 3-(3-ethoxy-9H-xanthen-9-yl)-5-methoxy-1H-indole (4dh)

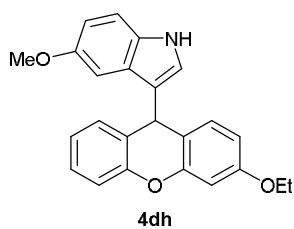

Yield 91%; White solid; Mp 146-147 °C; IR (KBr): 3344, 2975, 1629, 1607, 1509, 1485, 1431, 1312, 1283, 1233, 1154, 1113, 860, 780, 759  $\text{cm}^{-1}$ ;  $^1\text{H}$  NMR (400 MHz,  $\text{CDCl}_3$ ):  $\delta$  7.91 (s, 1H), 7.23-7.15 (m, 2H), 7.14-7.07 (m, 3H), 7.02-6.99 (m, 1H), 6.95 (m, 1H), 6.80-6.77 (m, 2H), 6.69-6.67 (m, 1H), 6.54-6.50 (m, 1H), 5.45 (s, 1H), 4.04-3.99 (m, 2H), 3.69-3.68 (m, 3H), 1.43-1.39 (m, 3H);  $^{13}\text{C}$  NMR (100 MHz,  $\text{CDCl}_3$ ):  $\delta$  158.54, 153.74, 151.87, 151.24, 131.87, 130.10, 129.59, 127.61, 126.33, 124.51, 123.27, 123.12, 120.60, 116.19, 112.02, 111.84, 110.49, 101.53, 63.60, 55.69, 34.91, 14.86; HRMS (ESI-TOF):  $m/z$  calcd for  $\text{C}_{24}\text{H}_{20}\text{NO}_3$   $[\text{M}-\text{H}]^-$ : 370.1449, found: 370.1448.

### 3-(4-iodo-9H-xanthen-9-yl)-1H-indole (4ea)

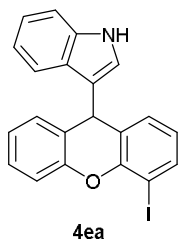

Yield 80%; Green oil; IR (KBr): 3415, 1618, 1558, 1485, 1455, 1438, 1354, 1245, 1101, 891, 742  $\text{cm}^{-1}$ ;  $^1\text{H}$  NMR (400 MHz,  $\text{CDCl}_3$ ):  $\delta$  8.02 (s, 1H), 7.65-7.63 (m, 1H), 7.32 (t,  $J$  = 7.2 Hz, 2H), 7.27 (dd,  $J$  = 8.0, 1.2 Hz, 1H), 7.22-7.18 (m, 1H), 7.16-7.12 (m, 1H), 7.09-7.05 (m, 3H), 7.00-6.96 (m, 1H), 6.96-6.92 (m, 1H), 6.65 (t,  $J$  = 8.0 Hz, 1H), 5.52 (s, 1H);  $^{13}\text{C}$  NMR (100 MHz,  $\text{CDCl}_3$ ):  $\delta$  151.38, 150.42, 137.57, 136.72, 129.66, 129.12, 127.86, 125.79, 125.62, 124.64, 124.50, 123.74, 123.14, 122.29, 119.76, 119.68, 119.44, 116.73, 111.32, 84.62, 36.11; HRMS (ESI-TOF):  $m/z$  calcd for  $\text{C}_{21}\text{H}_{13}\text{INO}$   $[\text{M}-\text{H}]^-$ : 422.0047, found: 422.0051.

### 3-(2,7-dibromo-9H-xanthen-9-yl)-1H-indole (4fa)

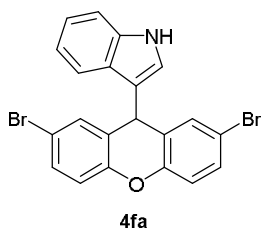

Yield 90%; White solid; Mp 216-217 °C; IR (KBr): 3436, 1616, 1542, 1472, 1405, 1297, 1251, 1181, 1099, 1012, 926, 765, 746  $\text{cm}^{-1}$ ;  $^1\text{H}$  NMR (400 MHz,  $\text{CDCl}_3$ ):  $\delta$  8.11 (s, 1H), 7.38 (d,  $J = 8.0$  Hz, 1H), 7.29 (d,  $J = 2.4$  Hz, 1H), 7.27 (d,  $J = 2.4$  Hz, 1H), 7.24 (s, 1H), 7.19-7.14 (m, 4H), 7.02 (s, 1H), 7.00-6.96 (m, 2H), 5.46 (s, 1H);  $^{13}\text{C}$  NMR (100 MHz,  $\text{CDCl}_3$ ):  $\delta$  149.87, 136.82, 132.18, 130.97, 125.59, 125.35, 122.77, 122.49, 119.96, 119.31, 119.16, 118.20, 115.60, 111.42, 35.31; HRMS (ESI-TOF):  $m/z$  calcd for  $\text{C}_{21}\text{H}_{12}\text{Br}_2\text{NO}$   $[\text{M}-\text{H}]^-$ : 451.9291, found: 451.9294.

#### 6-chloro-3-(2,7-dibromo-9H-xanthen-9-yl)-1H-indole (4fe)

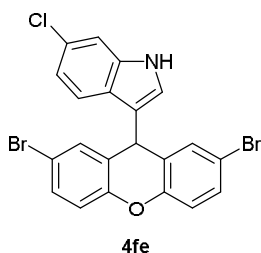

Yield 91%; White solid; Mp 210-211 °C; IR (KBr): 3457, 1616, 1466, 1401, 1278, 1249, 1179, 1064, 899, 803, 654  $\text{cm}^{-1}$ ;  $^1\text{H}$  NMR (400 MHz,  $\text{CDCl}_3$ ):  $\delta$  8.12 (s, 1H), 7.37 (d,  $J = 1.2$  Hz, 1H), 7.31-7.28 (m, 2H), 7.20 (d,  $J = 2.4$  Hz, 1H), 7.14 (dd,  $J = 2.0, 0.8$  Hz, 2H), 7.09 (d,  $J = 8.4$  Hz, 1H), 7.02 (d,  $J = 8.8$  Hz, 2H), 6.93 (dd,  $J = 8.4, 1.6$  Hz, 1H), 5.42 (s, 1H);  $^{13}\text{C}$  NMR (100 MHz,  $\text{CDCl}_3$ ):  $\delta$  149.83, 137.26, 132.04, 131.13, 128.56, 125.19, 123.84, 123.39, 120.79, 120.23, 119.08, 118.29, 115.67, 111.41, 35.21; HRMS (ESI-TOF):  $m/z$  calcd for  $\text{C}_{21}\text{H}_{11}\text{Br}_2\text{ClNO}$   $[\text{M}-\text{H}]^-$ : 485.8901, found: 485.8900.

#### 3-(2,7-dinitro-9H-xanthen-9-yl)-5-methoxy-1H-indole (4gh)

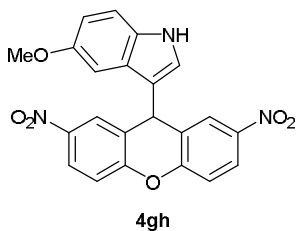

Yield 85%; White solid; Mp 172-173 °C; IR (KBr): 3415, 2935, 1637, 1618, 1471, 1410, 1256, 1110, 1058, 1019, 848, 820  $\text{cm}^{-1}$ ;  $^1\text{H}$  NMR (400 MHz,  $\text{CDCl}_3$ ):  $\delta$  8.00 (s, 1H), 7.25-7.22 (m, 1H), 7.15-7.11 (m, 3H), 7.06-7.04 (m, 4H), 6.83-6.80 (m, 1H), 6.68 (d,  $J = 2.4$  Hz, 1H), 5.40 (1H, s), 3.68 (d,  $J = 1.6$  Hz, 3H);  $^{13}\text{C}$  NMR (100 MHz,  $\text{CDCl}_3$ ):  $\delta$  153.99, 149.54, 131.98, 129.24, 128.15, 128.08, 125.90, 125.07, 123.46, 118.81, 117.70, 112.30, 112.10, 101.31, 55.72, 35.52; HRMS (ESI-TOF):  $m/z$  calcd for  $\text{C}_{22}\text{H}_{14}\text{N}_3\text{O}_6$  [M-H] $^-$ : 416.0888, found: 416.0890.

### 3-(9H-thioxanthen-9-yl)-1H-indole (5aa)

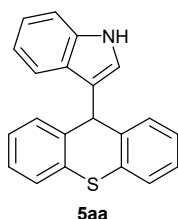

Yield 90%; White solid; Mp 158-159 °C; IR (KBr): 3388, 3052, 1462, 1456, 1418, 1348, 1253, 1122, 1077, 798, 760, 735  $\text{cm}^{-1}$ ;  $^1\text{H}$  NMR (400 MHz,  $\text{CDCl}_3$ ):  $\delta$  7.88 (s, 1H), 7.52 (d,  $J = 8.0$  Hz, 1H), 7.46-7.44 (m, 2H), 7.38-7.36 (m, 2H), 7.30 (dd,  $J = 8.0, 0.8$  Hz, 1H), 7.20-7.14 (m, 5H), 7.06-7.02 (m, 1H), 6.76 (s, 1H), 5.41 (s, 1H);  $^{13}\text{C}$  NMR (100 MHz,  $\text{CDCl}_3$ ):  $\delta$  138.01, 136.62, 133.29, 128.78, 127.09, 126.59, 126.56, 126.48, 123.61, 121.98, 120.14, 119.58, 114.28, 111.40, 45.77; HRMS (ESI-TOF):  $m/z$  calcd for  $\text{C}_{21}\text{H}_{15}\text{NSNa}$  [M+Na] $^+$ : 336.0817, found: 336.0813.

### 5-methoxy-3-(9H-thioxanthen-9-yl)-1H-indole (5ah)

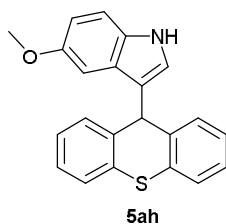

Yield 91%; Yellow solid; Mp 166-168 °C; IR (KBr): 3436, 3038, 2952, 2827, 1625, 1584, 1486, 1463, 1440, 1257, 1208, 1237, 1175, 1044, 936, 822, 749  $\text{cm}^{-1}$ ;  $^1\text{H}$  NMR (400 MHz,  $\text{CDCl}_3$ ):  $\delta$  7.87 (s, 1H), 7.47-7.45 (m, 2H), 7.40-7.38 (m, 2H), 7.22-7.18 (m, 5H), 6.88 (s, 1H), 6.83-6.81 (m, 1H), 6.76 (s, 1H), 5.36 (s, 1H), 3.71 (d,  $J = 1.6$  Hz, 3H);  $^{13}\text{C}$  NMR (100 MHz,  $\text{CDCl}_3$ ):  $\delta$  153.81, 137.97, 133.41, 131.77, 128.71, 127.11, 126.93,



126.58, 126.49, 124.48, 113.88, 112.05, 102.09, 55.87, 45.88; HRMS (ESI-TOF):  $m/z$  calcd for  $C_{22}H_{17}NOSNa$   $[M+Na]^+$ : 366.0923, found: 366.0925.

### 2-methyl-3-(9*H*-thioxanthen-9-yl)-1*H*-indole (5ai)

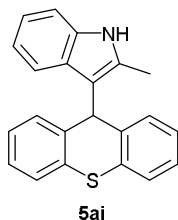

Yield 85%; Yellow solid; Mp 85-86 °C; IR (KBr): 3407, 3055, 1620, 1455, 1443, 1384, 1297, 1246, 1126, 1035, 775, 743, 509  $cm^{-1}$ ;  $^1H$  NMR (400 MHz,  $CDCl_3$ ):  $\delta$  8.03 (s, 1H), 7.50 (d,  $J = 7.6$  Hz, 2H), 7.40 (d,  $J = 8.4$  Hz, 1H), 7.18-7.14 (m, 3H), 7.07 (d,  $J = 8.0$  Hz, 1H), 7.03-6.92 (m, 5H), 4.99 (s, 1H), 2.35 (s, 3H);  $^{13}C$  NMR (100 MHz,  $CDCl_3$ ):  $\delta$  138.20, 135.74, 133.85, 133.67, 128.19, 127.98, 126.56, 126.29, 121.29, 120.96, 119.41, 110.53, 108.47, 42.99, 12.41; HRMS (ESI-TOF):  $m/z$  calcd for  $C_{22}H_{17}NSNa$   $[M+Na]^+$ : 350.0974, found: 350.0972.

### 5-bromo-1-methyl-3-(9*H*-thioxanthen-9-yl)-1*H*-indole (5am)

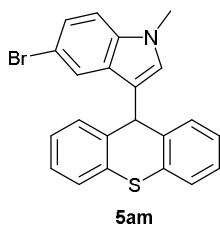

Yield 89%; White solid; Mp 184-185 °C; IR (KBr): 3423, 3058, 1653, 1473, 1463, 1419, 1197, 1141, 1078, 859, 770, 747  $cm^{-1}$ ;  $^1H$  NMR (400 MHz,  $CDCl_3$ ):  $\delta$  7.64 (s, 1H), 7.45 (t,  $J = 4.8$  Hz, 2H), 7.38 (t,  $J = 4.8$  Hz, 2H), 7.25-7.19 (m, 5H), 7.08 (d,  $J = 8.4$  Hz, 1H), 6.63 (s, 1H), 5.38 (s, 1H), 3.60 (s, 3H);  $^{13}C$  NMR (100 MHz,  $CDCl_3$ ):  $\delta$  137.69, 135.93, 133.05, 129.10, 128.72, 128.45, 127.19, 126.72, 124.34, 122.33, 112.71, 112.57, 110.97, 45.54, 32.95; HRMS (ESI-TOF):  $m/z$  calcd for  $C_{22}H_{16}BrNSNa$   $[M+Na]^+$ : 428.0079, found: 428.0081.

### 3-(9*H*-thioxanthen-9-yl)-1*H*-indole-4-carbonitrile (5ap)

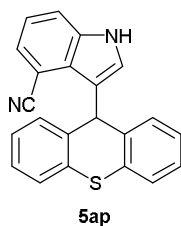

Yield 81%; White solid; Mp 266-267 °C; IR (KBr): 3325, 3053, 2225, 1650, 1457, 1442, 1343, 1276, 1175, 1113, 1045, 828, 791, 787 cm<sup>-1</sup>; <sup>1</sup>H NMR (400 MHz, DMSO-*d*<sub>6</sub>): δ 11.80 (s, 1H), 7.82 (d, *J* = 8.0 Hz, 1H), 7.69 (s, 1H), 7.58-7.52 (m, 3H), 7.30-7.18 (m, 7H), 5.82 (s, 1H); <sup>13</sup>C NMR (100 MHz, DMSO-*d*<sub>6</sub>): δ 138.72, 136.99, 131.74, 128.53, 127.27, 127.15, 127.12, 124.81, 121.55, 120.11, 118.03, 101.11, 42.95; HRMS (ESI-TOF): *m/z* calcd for C<sub>22</sub>H<sub>14</sub>N<sub>2</sub>SNa [M+Na]<sup>+</sup>: 361.0770, found: 361.0771.

**5-chloro-3-(9*H*-thioxanthen-9-yl)-1*H*-indole (5aq)**

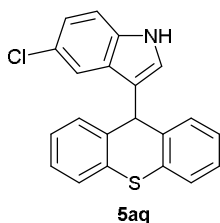

Yield 83%; Green oil; IR (KBr): 3397, 1719, 1565, 1461, 1415, 1315, 1214, 1082, 1062, 894, 859, 800, 741 cm<sup>-1</sup>; <sup>1</sup>H NMR (400 MHz, CDCl<sub>3</sub>): δ 7.82 (s, 1H), 7.45-7.41 (m, 3H), 7.34-7.32 (m, 2H), 7.19-7.15 (m, 4H), 7.10 (d, *J* = 8.4 Hz, 1H), 7.05 (dd, *J* = 8.4, 2.0 Hz, 1H), 6.69 (d, *J* = 2.4 Hz, 1H), 5.34 (s, 1H); <sup>13</sup>C NMR (100 MHz, CDCl<sub>3</sub>): δ 137.61, 134.92, 133.21, 128.75, 127.51, 127.20, 126.79, 126.72, 125.31, 124.89, 122.31, 119.35, 114.33, 112.39, 45.66; HRMS (ESI-TOF): *m/z* calcd for C<sub>21</sub>H<sub>13</sub>ClNS [M-H]<sup>-</sup>: 346.0463, found: 346.0460.

**2,5-di(9*H*-xanthen-9-yl)-1*H*-pyrrole (6a)**

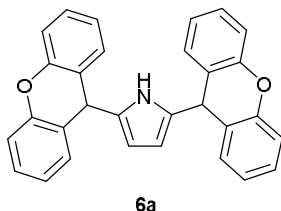

Yield 92%; White solid; Mp 198-200 °C; IR (KBr): 3379, 2845, 1601, 1573, 1481, 1447, 1317, 1256, 1120, 1035, 900, 764, 747 cm<sup>-1</sup>; <sup>1</sup>H NMR (400 MHz, CDCl<sub>3</sub>): δ 7.35 (s,

1H), 7.20-7.15 (m, 4H), 7.03 (d,  $J = 8.4$  Hz, 8H), 6.96 (t,  $J = 7.2$  Hz, 4H), 6.02-6.01 (m, 2H), 5.23 (s, 2H);  $^{13}\text{C}$  NMR (100 MHz,  $\text{CDCl}_3$ ):  $\delta$ ; HRMS (ESI-TOF):  $m/z$  calcd for  $\text{C}_{30}\text{H}_{20}\text{NO}_2$   $[\text{M}-\text{H}]^-$ : 426.1500, found: 426.1502.

### 2,5-di(9H-xanthen-9-yl)furan (6b)

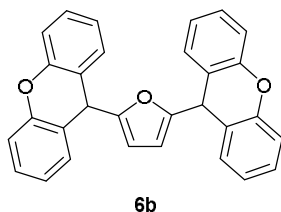

Yield 80%; Pink solid; Mp 113-114 °C; IR (KBr): 3410, 1618, 1480, 1451, 1257, 1119, 1012, 903, 746  $\text{cm}^{-1}$ ;  $^1\text{H}$  NMR (400 MHz,  $\text{CDCl}_3$ ):  $\delta$  7.23-7.22 (m, 8H), 7.13-7.11 (m, 4H), 7.04-7.01 (m, 4H), 5.63-5.61 (m, 2H), 5.29 (s, 2H);  $^{13}\text{C}$  NMR (100 MHz,  $\text{CDCl}_3$ ):  $\delta$  156.49, 151.33, 129.67, 128.32, 123.09, 121.27, 116.60, 107.02, 37.83; HRMS (ESI-TOF):  $m/z$  calcd for  $\text{C}_{30}\text{H}_{20}\text{KO}_3$   $[\text{M}+\text{K}]^+$ : 467.1044, found: 467.1047.

### 2-(9H-xanthen-9-yl)-1H-pyrrole (6c)

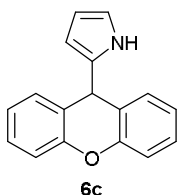

Yield 83%; White solid; Mp 112-113 °C; IR (KBr): 3403, 1600, 1576, 1481, 1452, 1254, 1186, 1124, 1094, 1027, 902, 756, 734, 716  $\text{cm}^{-1}$ ;  $^1\text{H}$  NMR (400 MHz,  $\text{CDCl}_3$ ):  $\delta$  7.68 (s, 1H), 7.26-7.21 (m, 2H), 7.16-7.10 (m, 4H), 7.06-7.01 (m, 2H), 6.64-6.62 (m, 1H), 6.18-6.16 (m, 1H), 6.15-6.12 (m, 1H), 5.37 (s, 1H);  $^{13}\text{C}$  NMR (100 MHz,  $\text{CDCl}_3$ ):  $\delta$  151.25, 134.25, 129.48, 129.45, 128.23, 123.42, 122.87, 118.15, 116.67, 107.95, 107.27, 37.24; HRMS (ESI-TOF):  $m/z$  calcd for  $\text{C}_{17}\text{H}_{12}\text{NO}$   $[\text{M}-\text{H}]^-$ : 246.0924, found: 246.0921.

### 9-(furan-2-yl)-9H-xanthene (6d)

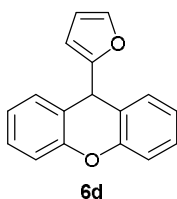

Yield 81%; White solid; Mp 96-97 °C; IR (KBr): 3464, 3040, 1604, 1577, 1481, 1451, 1318, 1255, 1208, 1141, 1070, 1008, 926, 903, 748, 687  $\text{cm}^{-1}$ ;  $^1\text{H}$  NMR (400 MHz,

CDCl<sub>3</sub>):  $\delta$  7.29-7.28 (m, 1H), 7.27-7.23 (m, 4H), 7.12 (d,  $J$  = 8.4 Hz, 2H), 7.07-7.03 (m, 2H), 6.24-6.23 (m, 1H), 5.91-5.90 (m, 1H), 5.37 (s, 1H); <sup>13</sup>C NMR (100 MHz, CDCl<sub>3</sub>):  $\delta$  156.98, 151.40, 142.20, 129.49, 128.40, 123.20, 121.35, 116.74, 110.15, 106.56, 37.95; HRMS (ESI-TOF):  $m/z$  calcd for C<sub>17</sub>H<sub>12</sub>KO<sub>2</sub> [M+K]<sup>+</sup>: 287.0469, found: 287.0465.

### 2-(2,7-dibromo-9H-xanthen-9-yl)-1-methyl-1H-pyrrole (6e)

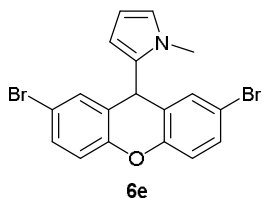

Yield 80%; White solid; Mp 142-143 °C; IR (KBr): 3458, 1466, 1406, 1300, 1253, 1182, 1111, 809, 719 cm<sup>-1</sup>; <sup>1</sup>H NMR (400 MHz, CDCl<sub>3</sub>):  $\delta$  7.33-7.30 (m, 2H), 7.09-7.08 (m, 2H), 6.96 (d,  $J$  = 8.8 Hz, 2H), 6.55 (t,  $J$  = 2.4 Hz, 1H), 6.24-6.23 (m, 1H), 6.12-6.10 (m, 1H), 5.42 (s, 1H), 3.07 (s, 3H); <sup>13</sup>C NMR (100 MHz, CDCl<sub>3</sub>):  $\delta$  149.58, 131.80, 131.41, 124.09, 123.87, 118.27, 115.92, 111.16, 106.61, 36.38, 34.71; HRMS (ESI-TOF):  $m/z$  calcd for C<sub>18</sub>H<sub>14</sub>Br<sub>2</sub>NO [M+H]<sup>+</sup>: 417.9437, found: 417.9440.

### 3-(9H-xanthen-9-yl)pentane-2,4-dione (6f)

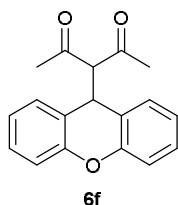

Yield 88%; White solid; Mp 136-137 °C; IR (KBr): 3462, 1725, 1701, 1639, 1478, 1459, 1354, 1278, 1253, 1146, 1118, 766, 746 cm<sup>-1</sup>; <sup>1</sup>H NMR (400 MHz, CDCl<sub>3</sub>):  $\delta$  7.27-7.23 (m, 2H), 7.20 (dd,  $J$  = 7.6, 1.6 Hz, 2H), 7.16 (dd,  $J$  = 8.4, 1.2 Hz, 2H), 7.06-7.02 (m, 2H), 4.84 (d,  $J$  = 9.6 Hz, 1H), 4.11 (d,  $J$  = 10 Hz, 1H), 1.87 (s, 6H); <sup>13</sup>C NMR (100 MHz, CDCl<sub>3</sub>):  $\delta$  201.86, 153.29, 129.11, 128.43, 123.76, 123.30, 116.82, 73.64, 40.22, 32.04; HRMS (ESI-TOF):  $m/z$  calcd for C<sub>18</sub>H<sub>15</sub>O<sub>3</sub> [M-H]<sup>-</sup>: 279.1027, found: 279.1025.

### 2-(9H-xanthen-9-yl)-1H-indene-1,3(2H)-dione (6g)

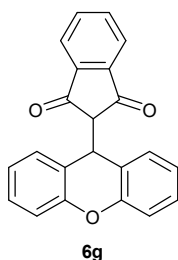

Yield 81%; Brown solid; Mp 140-141 °C; IR (KBr): 3440, 2924, 1745, 1710, 1599, 1574, 1486, 1456, 1347, 1284, 1223, 1124, 912, 873, 759, 586  $\text{cm}^{-1}$ ;  $^1\text{H}$  NMR (400 MHz,  $\text{CDCl}_3$ ):  $\delta$  7.82-7.78 (m, 2H), 7.72-7.68 (m, 2H), 7.18-7.13 (m, 4H), 7.08 (d,  $J$  = 8.0 Hz, 2H), 6.93-6.89 (m, 2H), 5.05 (d,  $J$  = 3.2 Hz, 1H), 3.37 (d,  $J$  = 2.8 Hz, 1H);  $^{13}\text{C}$  NMR (100 MHz,  $\text{CDCl}_3$ ):  $\delta$  198.75, 152.45, 142.78, 135.55, 128.59, 128.15, 123.27, 122.98, 120.65, 116.81, 62.36, 37.79; HRMS (ESI-TOF):  $m/z$  calcd for  $\text{C}_{22}\text{H}_{14}\text{O}_3\text{Na}$   $[\text{M}+\text{Na}]^+$ : 349.0835, found: 349.0837.

**1,3-dimethyl-5-(9H-xanthen-9-yl)pyrimidine-2,4,6(1H,3H,5H)-trione (6h)**

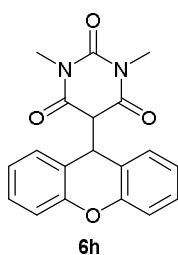

Yield 93%; White solid; Mp 179-180 °C; IR (KBr): 3413, 2967, 1749, 1679, 1601, 1478, 1379, 1283, 1257, 1121, 1109, 990, 764, 514  $\text{cm}^{-1}$ ;  $^1\text{H}$  NMR (400 MHz,  $\text{CDCl}_3$ ):  $\delta$  7.34-7.30 (m, 2H), 7.20-7.18 (m, 2H), 7.13-7.09 (m, 4H), 5.00 (d,  $J$  = 4.0 Hz, 1H), 3.73 (d,  $J$  = 3.6 Hz, 1H), 3.07 (s, 6H);  $^{13}\text{C}$  NMR (100 MHz,  $\text{CDCl}_3$ ):  $\delta$  166.75, 152.82, 150.94, 129.57, 127.96, 123.66, 119.40, 116.80, 58.76, 44.54, 28.32; HRMS (ESI-TOF):  $m/z$  calcd for  $\text{C}_{19}\text{H}_{16}\text{N}_2\text{O}_4\text{Na}$   $[\text{M}+\text{Na}]^+$ : 359.1002, found: 359.1005.

**3-hydroxy-2-(9H-xanthen-9-yl)cyclohex-2-en-1-one (6i)**

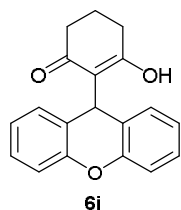

Yield 90%; White solid; Mp 242-243 °C; IR (KBr): 3416, 2509, 1616, 1569, 1447, 1375, 1256, 1194, 1087, 988, 905, 774, 750  $\text{cm}^{-1}$ ;  $^1\text{H}$  NMR (400 MHz,  $\text{CDCl}_3$ ):  $\delta$  7.12 (t,  $J = 7.2$  Hz, 2H), 6.98-6.91 (m, 6H), 5.51 (s, 1H), 2.36 (s, 4H), 1.85 (t,  $J = 6.0$  Hz, 2H);  $^{13}\text{C}$  NMR (100 MHz,  $\text{CDCl}_3$ ):  $\delta$  151.41, 128.39, 127.39, 124.85, 123.08, 115.70, 30.79, 20.92; HRMS (ESI-TOF):  $m/z$  calcd for  $\text{C}_{19}\text{H}_{15}\text{O}_3$   $[\text{M}-\text{H}]^-$ : 291.1027, found: 291.1022.

#### 4-hydroxy-3-(9H-xanthen-9-yl)-2H-chromen-2-one (6j)

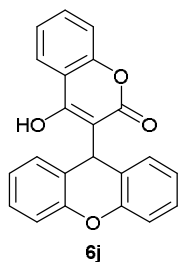

Yield 92%; White solid; Mp 218-219 °C; IR (KBr): 3231, 1685, 1628, 1566, 1497, 1483, 1455, 1396, 1302, 1267, 1201, 1168, 1066, 900, 747  $\text{cm}^{-1}$ ;  $^1\text{H}$  NMR (400 MHz,  $\text{CDCl}_3$ ):  $\delta$  8.07 (s, 1H), 7.60 (t,  $J = 8.0$  Hz, 1H), 7.35 (d,  $J = 8.4$  Hz, 2H), 7.19 (t,  $J = 7.6$  Hz, 2H), 7.10-7.05 (m, 4H), 6.96 (t,  $J = 7.2$  Hz, 2H), 5.92 (s, 1H);  $^{13}\text{C}$  NMR (100 MHz,  $\text{CDCl}_3$ ):  $\delta$  161.26, 152.84, 151.44, 132.62, 128.64, 128.26, 124.41, 123.36, 122.74, 116.76, 116.60, 116.14, 32.83; HRMS (ESI-TOF):  $m/z$  calcd for  $\text{C}_{22}\text{H}_{13}\text{O}_4$   $[\text{M}-\text{H}]^-$ : 341.0819, found: 341.0820.

#### 9-ethoxy-9H-xanthene (6k)

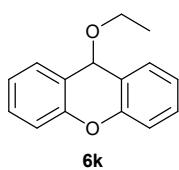

Yield 94%; Colorless oil; IR (KBr): 3414, 2974, 1607, 1480, 1340, 1257, 1213, 1062, 984, 904, 755  $\text{cm}^{-1}$ ;  $^1\text{H}$  NMR (400 MHz,  $\text{CDCl}_3$ ):  $\delta$  7.52 (d,  $J = 7.6$  Hz, 2H), 7.34 (t,  $J = 7.6$  Hz, 2H), 7.17-7.13 (m, 4H), 5.76 (s, 1H), 3.17-3.12 (m, 2H), 1.05 (t,  $J = 6.8$  Hz, 3H);  $^{13}\text{C}$  NMR (100 MHz,  $\text{CDCl}_3$ ):  $\delta$  162.35, 129.96, 129.46, 123.19, 120.35, 116.59, 69.96, 59.54, 15.39; HRMS (ESI-TOF):  $m/z$  calcd for  $\text{C}_{15}\text{H}_{15}\text{O}_2$   $[\text{M}+\text{H}]^+$ : 227.1067, found: 227.1069.

#### 3-(bis(4-methoxyphenyl)methyl)-1H-indole (8b)

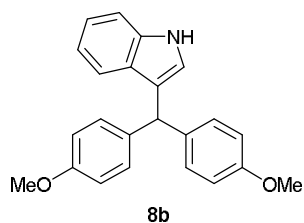

Yield 99%; Brown oil; IR (KBr): 3417, 2834, 1608, 1507, 1456, 1337, 1300, 1245, 1173, 1109, 1032, 815, 742  $\text{cm}^{-1}$ ;  $^1\text{H}$  NMR (400 MHz,  $\text{CDCl}_3$ ):  $\delta$  7.97 (s, 1H), 7.35-7.33 (m, 1H), 7.22 (d,  $J = 8.0$  Hz, 1H), 7.18-7.12 (m, 5H), 7.00-6.97 (m, 1H), 6.83-6.80 (m, 4H), 6.54 (d,  $J = 1.2$  Hz, 1H), 5.57 (s, 1H), 3.78 (s, 6H);  $^{13}\text{C}$  NMR (100 MHz,  $\text{CDCl}_3$ ):  $\delta$  157.88, 136.74, 136.51, 129.83, 126.96, 123.93, 122.05, 120.63, 120.03, 119.33, 113.60, 111.04, 55.25, 47.11; HRMS (ESI-TOF):  $m/z$  calcd for  $\text{C}_{23}\text{H}_{20}\text{NO}_2$  [M-H]: 342.1500, found: 342.1502.

#### 2,5-bis(bis(4-methoxyphenyl)methyl)-1H-pyrrole (8c)

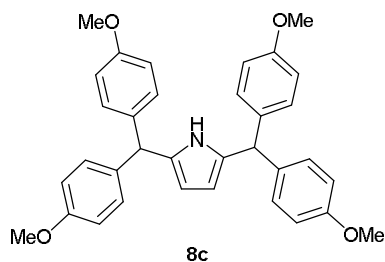

Yield 80%; Yellow solid; Mp 147-148  $^{\circ}\text{C}$ ; IR (KBr): 3416, 3339, 2835, 1700, 1610, 1507, 1464, 1302, 1249, 1174, 1111, 1032, 801, 786  $\text{cm}^{-1}$ ;  $^1\text{H}$  NMR (400 MHz,  $\text{CDCl}_3$ ):  $\delta$  7.48 (s, 1H), 7.05 (d,  $J = 8.4$  Hz, 8H), 6.79 (d,  $J = 8.4$  Hz, 8H), 5.57 (d,  $J = 2.4$  Hz, 2H), 5.25 (s, 2H), 3.76 (s, 12H);  $^{13}\text{C}$  NMR (100 MHz,  $\text{CDCl}_3$ ):  $\delta$  158.15, 135.67, 134.11, 129.72, 113.72, 107.67, 55.28, 48.96; HRMS (ESI-TOF):  $m/z$  calcd for  $\text{C}_{34}\text{H}_{33}\text{NO}_4\text{K}$  [M+K] $^+$ : 558.2041, found: 558.2041.

#### 4,4'-((1-methyl-1H-indol-3-yl)methylene)bis(N,N-dimethylaniline) (8d)

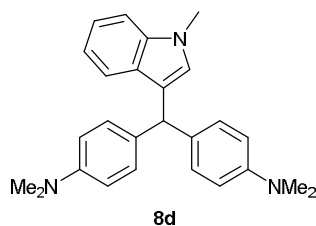

Yield 84%; Purple solid; Mp 172-173  $^{\circ}\text{C}$ ; IR (KBr): 3416, 2854, 1611, 1517, 1474, 1442, 1328, 1227, 1199, 1165, 1116, 1056, 944, 814, 802, 743  $\text{cm}^{-1}$ ;  $^1\text{H}$  NMR (400 MHz,

CDCl<sub>3</sub>):  $\delta$  7.27-7.24 (m, 2H), 7.17-7.16 (m, 1H), 7.11-7.08 (m, 4H), 6.98-6.95 (m, 1H), 6.68-6.65 (m, 4H), 6.43 (d,  $J$  = 3.6 Hz, 1H), 5.50 (d,  $J$  = 4.0 Hz, 1H), 3.66-3.65 (m, 3H), 2.90-2.89 (m, 12H); <sup>13</sup>C NMR (100 MHz, CDCl<sub>3</sub>):  $\delta$  148.94, 137.48, 133.32, 129.54, 128.66, 127.61, 121.41, 120.36, 119.73, 118.64, 112.68, 109.03, 46.84, 40.92, 32.71; HRMS (ESI-TOF):  $m/z$  calcd for C<sub>26</sub>H<sub>29</sub>N<sub>3</sub>Na [M+Na]<sup>+</sup>: 406.2254, found: 406.2252.

**5-(bis(4-(dimethylamino)phenyl)methyl)-2,2-dimethyl-1,3-dioxane-4,6-dione (8e)**

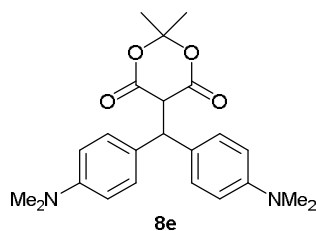

Yield 95%; Green solid; Mp 163-164 °C; IR (KBr): 3419, 2869, 1782, 1748, 1617, 1521, 1397, 1325, 1297, 1203, 1180, 1059, 1017, 902, 814 cm<sup>-1</sup>; <sup>1</sup>H NMR (400 MHz, CDCl<sub>3</sub>):  $\delta$  7.19 (d,  $J$  = 8.4 Hz, 4H), 6.66 (d,  $J$  = 8.8 Hz, 4H), 5.21 (d,  $J$  = 2.0 Hz, 1H), 4.24 (d,  $J$  = 2.4 Hz, 1H), 2.91 (s, 12H), 1.71 (s, 3H), 1.48 (s, 3H); <sup>13</sup>C NMR (100 MHz, CDCl<sub>3</sub>):  $\delta$  165.25, 149.40, 129.87, 128.40, 112.35, 105.01, 51.53, 48.21, 40.64, 28.30, 27.88; HRMS (ESI-TOF):  $m/z$  calcd for C<sub>23</sub>H<sub>27</sub>N<sub>2</sub>O<sub>4</sub> [M-H]<sup>-</sup>: 395.1976, found: 395.1975.

**3-(bis(4-(dimethylamino)phenyl)methyl)pentane-2,4-dione (8f)**

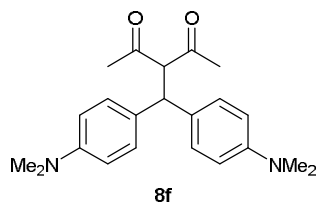

Yield 82%; Blue solid; Mp 148-149 °C; IR (KBr): 3426, 1734, 1692, 1613, 1521, 1446, 1356, 1226, 1166, 1062, 950, 830, 795, 543 cm<sup>-1</sup>; <sup>1</sup>H NMR (400 MHz, CDCl<sub>3</sub>):  $\delta$  7.09 (d,  $J$  = 8.0 Hz, 4H), 6.61 (d,  $J$  = 8.0 Hz, 4H), 4.65-4.58 (m, 2H), 2.85 (s, 12H), 1.99 (s, 6H); <sup>13</sup>C NMR (100 MHz, CDCl<sub>3</sub>):  $\delta$  204.00, 149.32, 129.98, 128.26, 112.93, 75.05, 49.90, 40.55, 29.79; HRMS (ESI-TOF):  $m/z$  calcd for C<sub>22</sub>H<sub>27</sub>N<sub>2</sub>O<sub>2</sub> [M-H]<sup>-</sup>: 351.2078, found: 351.2079.

**3-((1*H*-indol-3-yl)(phenyl)methyl)-9-ethyl-9*H*-carbazole (8g)**



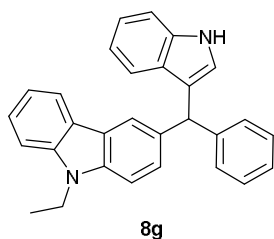

Yield 85%; White solid; Mp 194-195 °C; IR (KBr): 3397, 2973, 1598, 1470, 1417, 1331, 1231, 1146, 1090, 762, 743, 710  $\text{cm}^{-1}$ ;  $^1\text{H}$  NMR (400 MHz,  $\text{CDCl}_3$ ):  $\delta$  7.99-7.95 (m, 3H), 7.46-7.30 (m, 10H), 7.25-7.22 (m, 1H), 7.19-7.14 (m, 2H), 7.01-6.95 (m, 1H), 6.57 (s, 1H), 5.89 (t,  $J = 4.8$  Hz, 1H), 4.36-4.31 (m, 2H), 1.44-1.40 (m, 3H);  $^{13}\text{C}$  NMR (100 MHz,  $\text{CDCl}_3$ ):  $\delta$  144.75, 140.21, 138.75, 136.76, 134.59, 129.11, 128.29, 127.12, 127.03, 126.11, 125.48, 124.25, 122.86, 122.06, 120.83, 120.62, 120.52, 120.12, 119.37, 118.58, 111.04, 108.41, 108.22, 48.83, 37.60, 13.96; HRMS (ESI-TOF):  $m/z$  calcd for  $\text{C}_{29}\text{H}_{23}\text{N}_2$   $[\text{M}-\text{H}]^-$ : 399.1867, found: 399.1864.

### 3-(benzofuran-2-yl(4-methoxyphenyl)methyl)-1H-indole (8h)

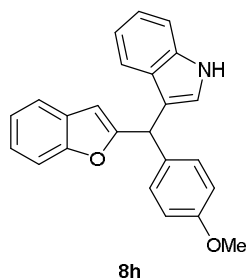

Yield 96%; Yellow solid; Mp 67-68 °C; IR (KBr): 3417, 1656, 1639, 1509, 1454, 1247, 1175, 1094, 814, 742  $\text{cm}^{-1}$ ;  $^1\text{H}$  NMR (400 MHz,  $\text{CDCl}_3$ ):  $\delta$  7.98 (s, 1H), 7.45-7.43 (m, 3H), 7.35 (dd,  $J = 8.0, 1.2$  Hz, 1H), 7.27-7.24 (m, 2H), 7.21-7.17 (m, 3H), 7.06-7.04 (m, 1H), 6.88-6.84 (m, 2H), 6.77 (s, 1H), 6.33-6.32 (m, 1H), 5.76 (d,  $J = 3.2$  Hz, 1H), 3.80-3.79 (m, 3H);  $^{13}\text{C}$  NMR (100 MHz,  $\text{CDCl}_3$ ):  $\delta$  160.46, 158.49, 155.06, 136.55, 133.19, 129.63, 128.70, 126.66, 123.55, 122.56, 122.28, 120.67, 119.64, 117.02, 113.92, 111.22, 104.55, 55.32, 42.31; HRMS (ESI-TOF):  $m/z$  calcd for  $\text{C}_{24}\text{H}_{18}\text{NO}_2$   $[\text{M}-\text{H}]^-$ : 352.1343, found: 352.1345.

### 3-(di(benzofuran-2-yl)methyl)-1H-indole (8i)

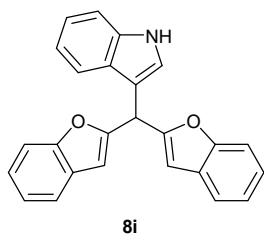

Yield 96%; Red solid; Mp 155-156 °C; IR (KBr): 3416, 3056, 1617, 1453, 1414, 1254, 1163, 1102, 953, 804, 747  $\text{cm}^{-1}$ ;  $^1\text{H}$  NMR (400 MHz,  $\text{CDCl}_3$ ):  $\delta$  8.04 (s, 1H), 7.56 (d,  $J = 7.6$  Hz, 1H), 7.46 (dd,  $J = 7.6, 0.8$  Hz, 2H), 7.43 (d,  $J = 8.0$  Hz, 2H), 7.35 (d,  $J = 8.4$  Hz, 1H), 7.25-7.22 (m, 1H), 7.21-7.16 (m, 4H), 7.09-7.05 (m, 2H), 6.52 (d,  $J = 0.8$  Hz, 2H), 5.99 (s, 1H);  $^{13}\text{C}$  NMR (100 MHz,  $\text{CDCl}_3$ ):  $\delta$  156.94, 155.02, 136.39, 128.53, 126.35, 123.90, 123.49, 122.75, 122.46, 120.90, 119.91, 119.38, 113.25, 111.40, 111.28, 104.61, 37.56; HRMS (ESI-TOF):  $m/z$  calcd for  $\text{C}_{25}\text{H}_{16}\text{NO}_2$   $[\text{M-H}]^-$ : 362.1187, found: 362.1190.

### 1-(3-indolethyl)ferrocene (8j)

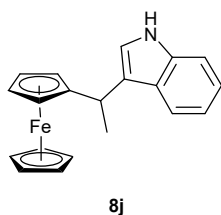

Yield 92%; Yellow solid; Mp 121-122 °C; IR (KBr): 3418, 2973, 1637, 1454, 1417, 1335, 1219, 1102, 998, 836, 744  $\text{cm}^{-1}$ ;  $^1\text{H}$  NMR (400 MHz,  $\text{CDCl}_3$ ):  $\delta$  7.84 (s, 1H), 7.65 (d,  $J = 8.0$  Hz, 1H), 7.32 (d,  $J = 8.0$  Hz, 1H), 7.19-7.08 (m, 2H), 6.75 (d,  $J = 2.4$  Hz, 1H), 4.25-4.08 (m, 10H), 1.70 (d,  $J = 7.2$  Hz, 3H);  $^{13}\text{C}$  NMR (100 MHz,  $\text{CDCl}_3$ ):  $\delta$  136.29, 126.47, 123.27, 121.81, 120.67, 119.36, 119.12, 111.16, 94.78, 68.64, 68.13, 67.37, 66.80, 66.45, 30.69, 21.74; HRMS (ESI-TOF):  $m/z$  calcd for  $\text{C}_{20}\text{H}_{18}\text{FeN}$   $[\text{M-H}]^-$ : 328.0794, found: 328.0782.

### (6-chloro-2-3-indol phenylmethyl)ferrocene (8k)

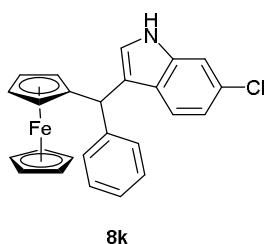

Yield 98%; Yellow solid; Mp 202-203 °C; IR (KBr): 3399, 2860, 1700, 1653, 1451, 1395, 1332, 1224, 1104, 1094, 1038, 906, 844, 808, 744, 705 cm<sup>-1</sup>; <sup>1</sup>H NMR (400 MHz, CDCl<sub>3</sub>): δ 7.89 (s, 1H), 7.33-7.27 (m, 5H), 7.23-7.21 (m, 1H), 7.11 (d, J = 8.4 Hz, 1H), 6.90 (dd, J = 8.4, 1.6 Hz, 1H), 6.81 (s, 1H), 5.26 (s, 1H), 4.22-4.16 (m, 3H), 4.03-3.99 (m, 6H); <sup>13</sup>C NMR (100 MHz, CDCl<sub>3</sub>): δ 144.05, 136.78, 128.68, 128.07, 127.80, 126.33, 125.26, 123.23, 121.54, 120.62, 120.03, 110.93, 92.44, 69.05, 68.95, 68.53, 67.78, 67.57, 43.44; HRMS (ESI-TOF): *m/z* calcd for C<sub>25</sub>H<sub>19</sub>ClFeN [M-H]<sup>-</sup>: 424.0561, found: 424.0544.



# <sup>1</sup>H-NMR and <sup>13</sup>C-NMR spectral of compound 4ab

M-6

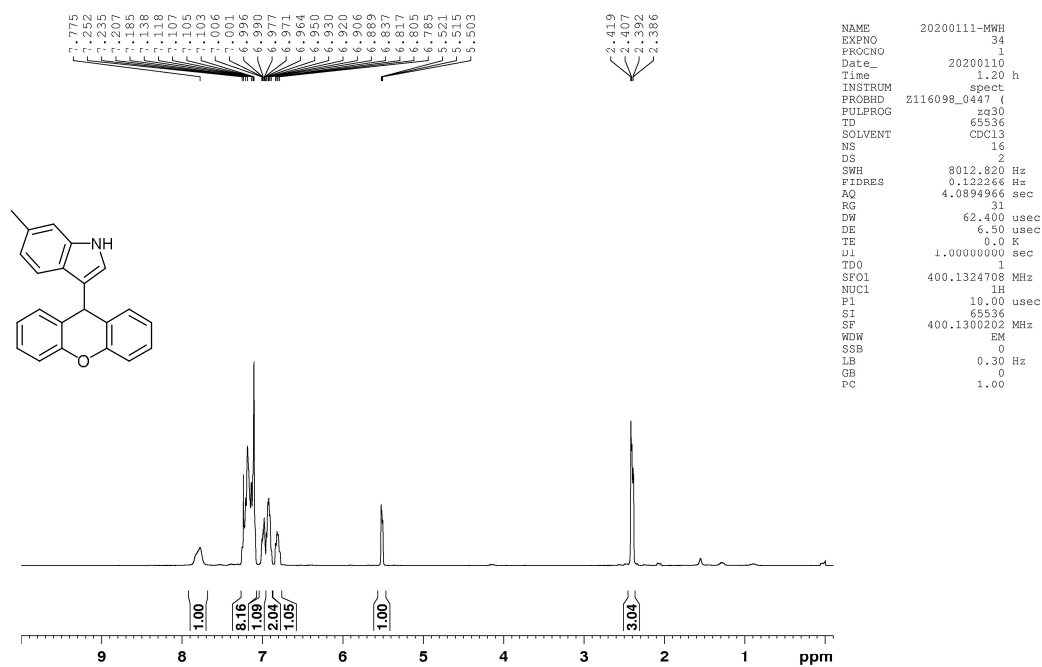

M-6

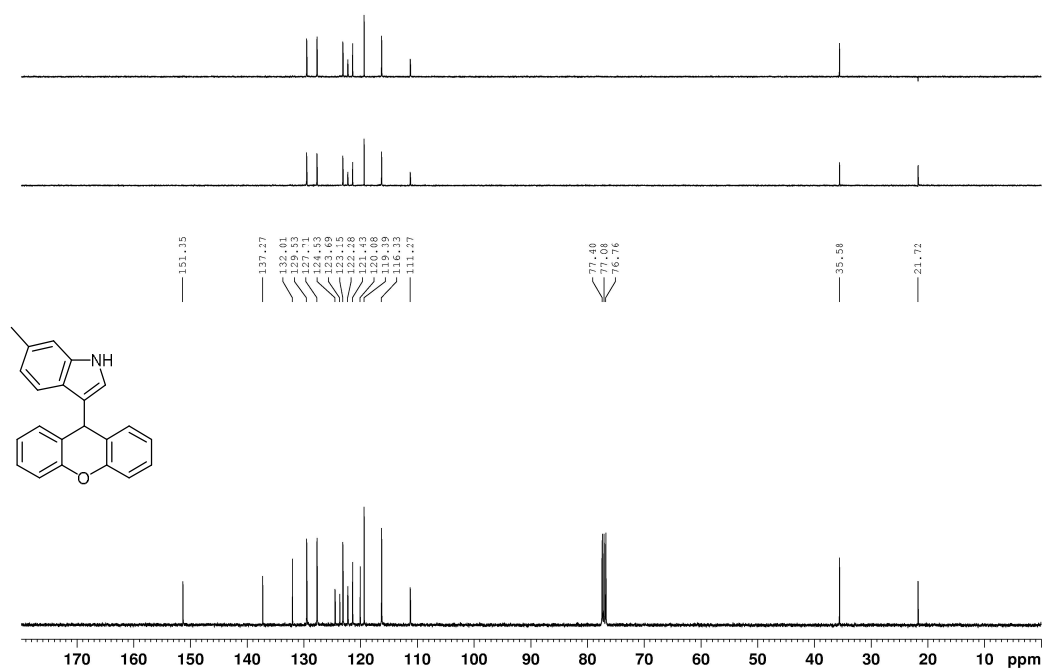

# <sup>1</sup>H-NMR and <sup>13</sup>C-NMR spectral of compound 4ac

M-7

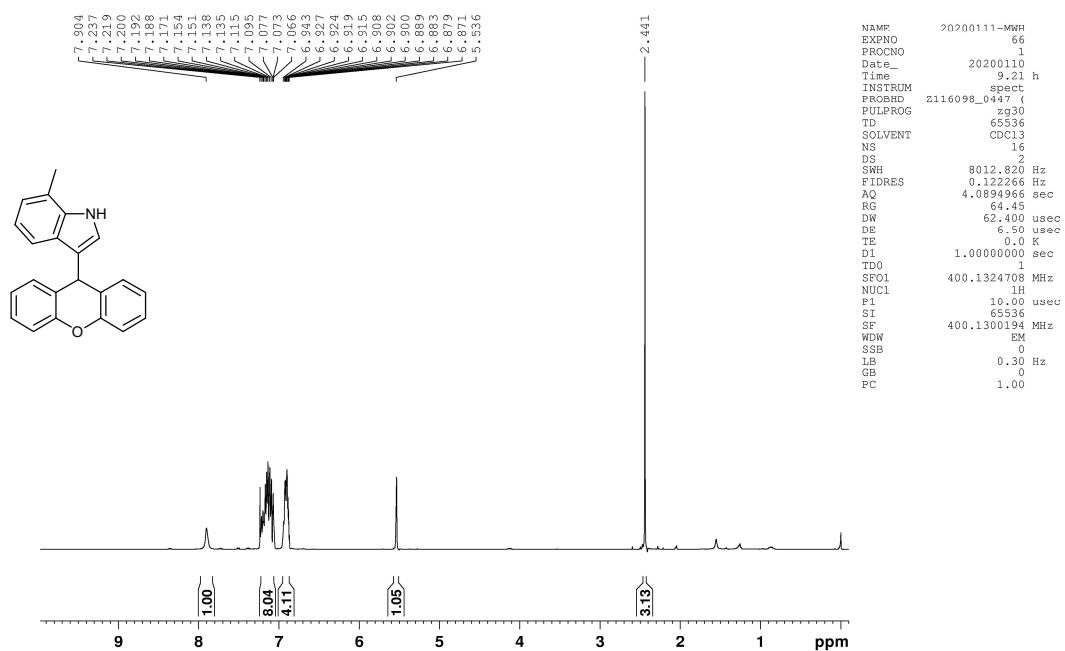

M-7

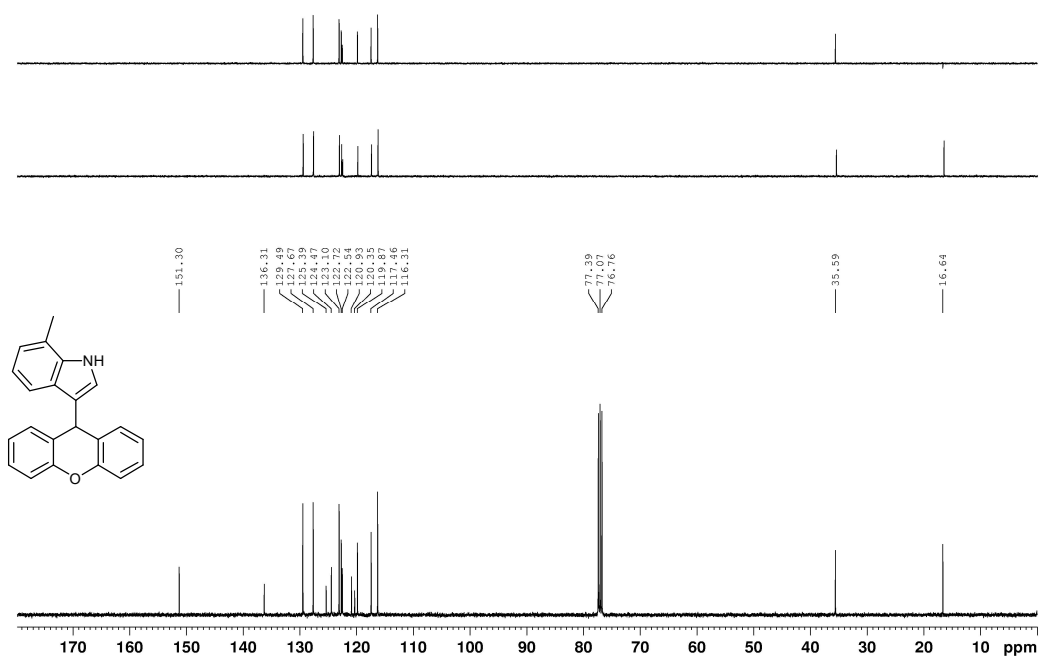

# <sup>1</sup>H-NMR and <sup>13</sup>C-NMR spectral of compound 4ad

M-5

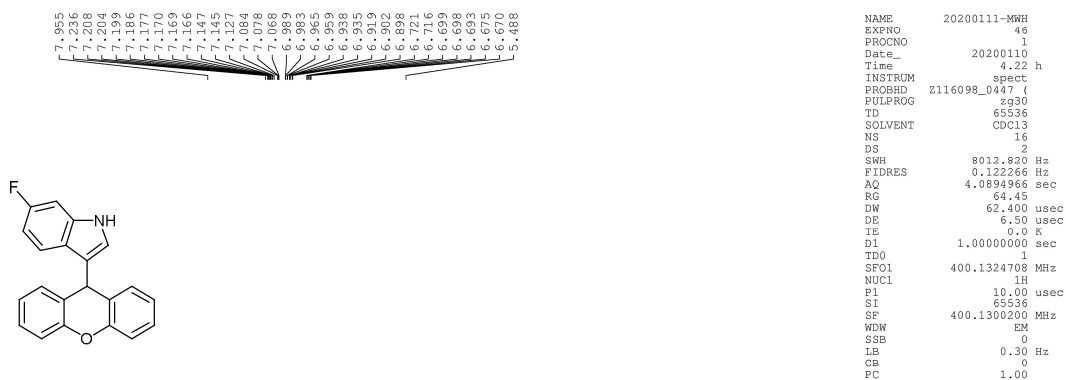

M-5

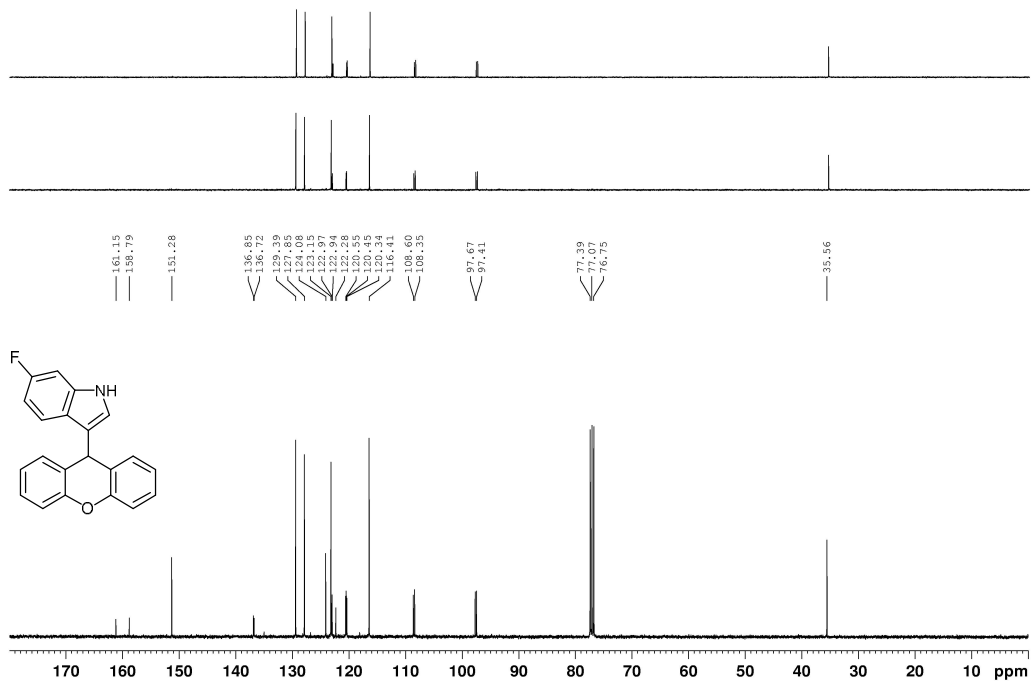

# <sup>1</sup>H-NMR and <sup>13</sup>C-NMR spectral of compound 4ae

M-15

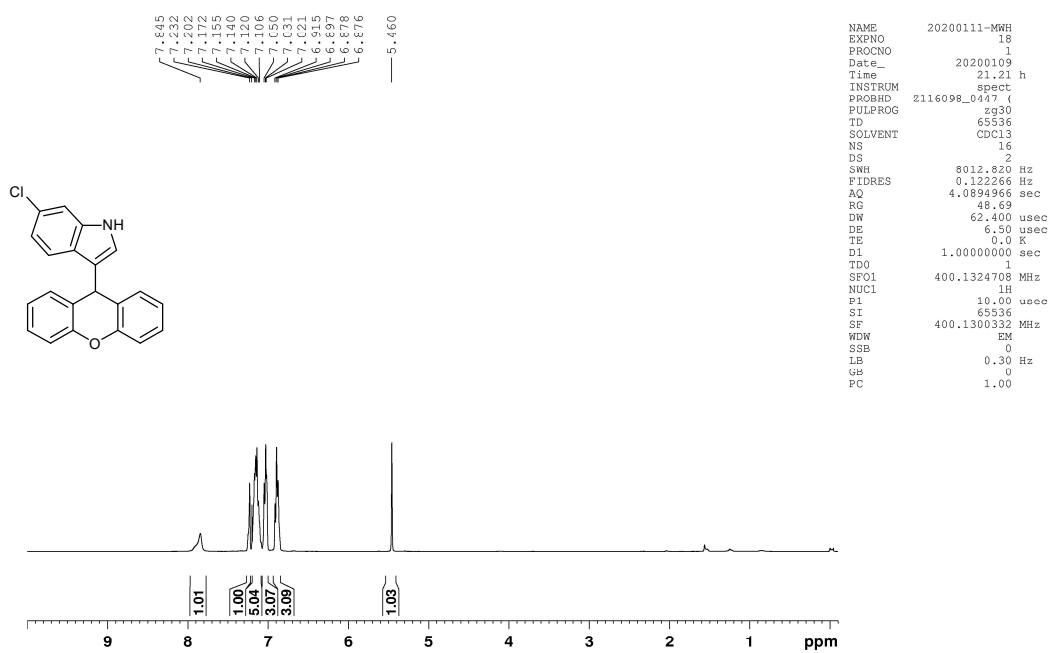

M-15

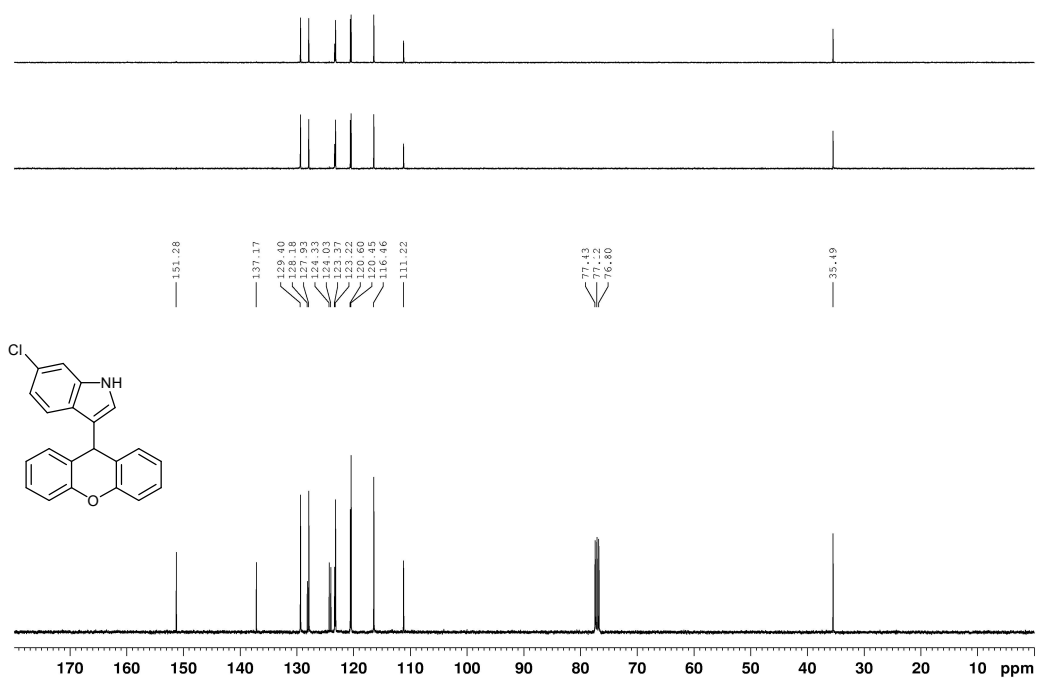



# <sup>1</sup>H-NMR and <sup>13</sup>C-NMR spectral of compound 4af

M-11

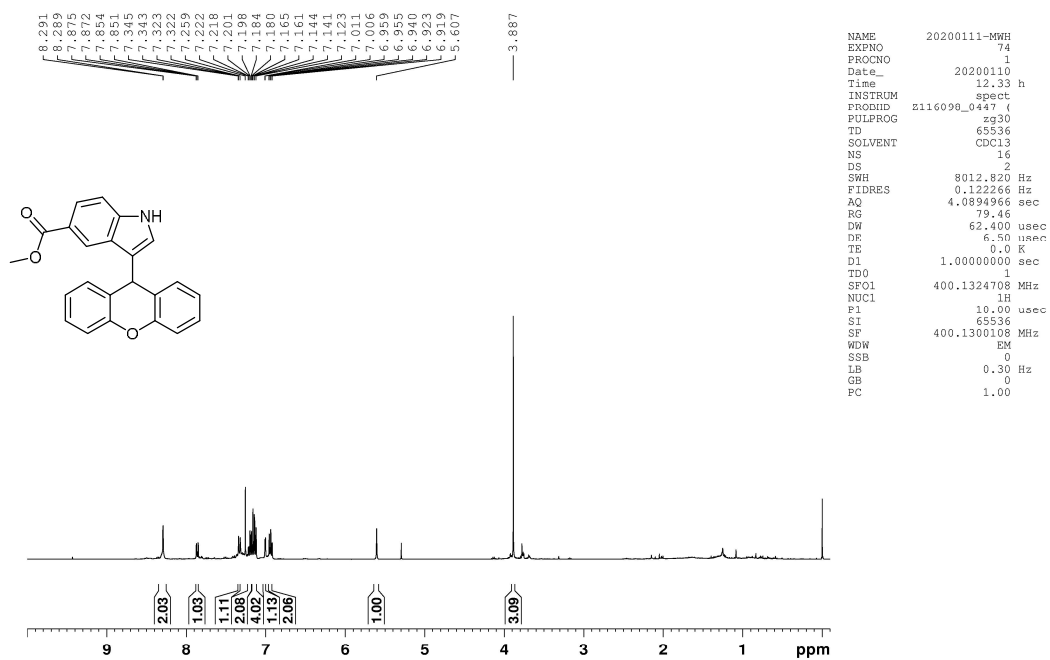

M-11

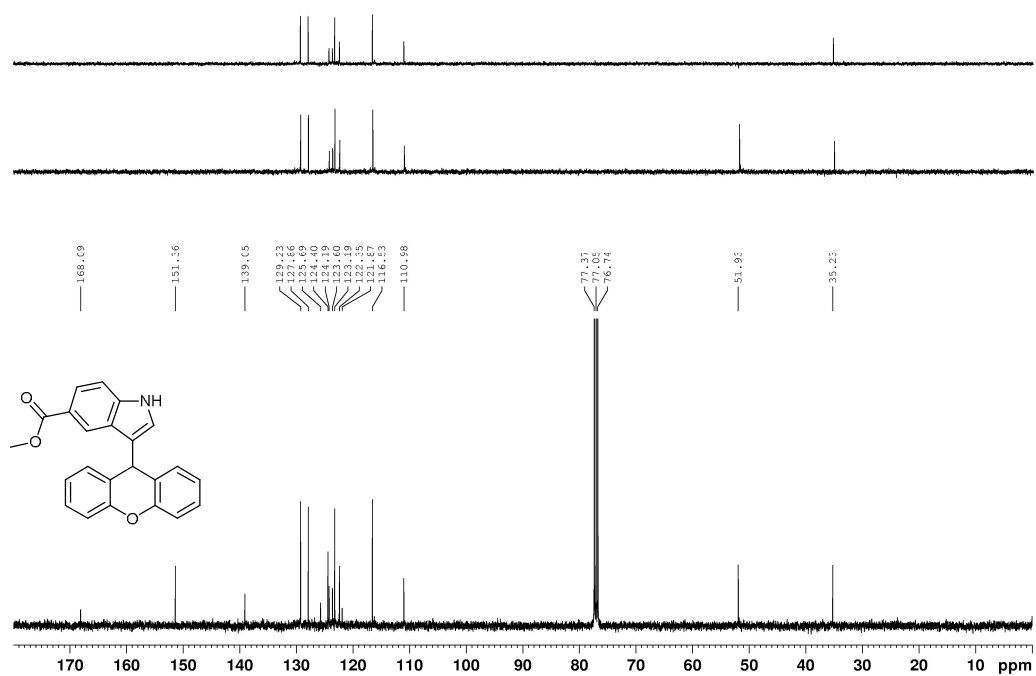

# <sup>1</sup>H-NMR and <sup>13</sup>C-NMR spectral of compound 4ag

M-9

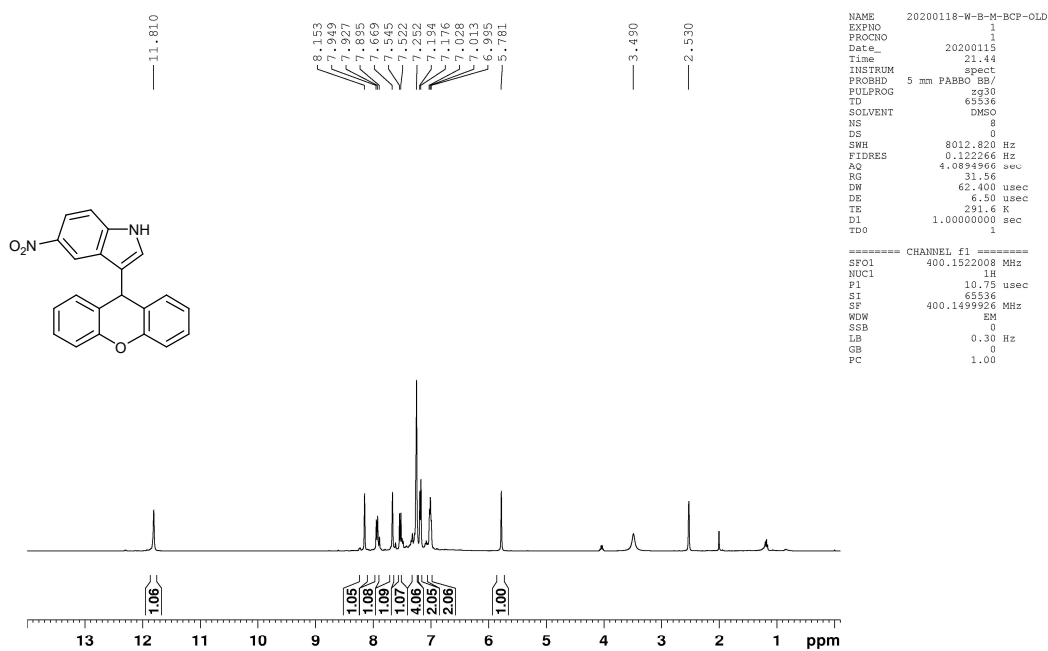

```

NAME      20200118-W-B-M-BCP-OLD
EXPNO    1
PROCNO   1
Date_    20200115
Time     21.44
INSTRUM  spect
PROBHD   5 mm PABBO BB/
PULPROG  zg30
TD       65536
SOLVENT  DMSO
NS       0
DS       0
SWH      8012.820 Hz
FIDRES   0.122266 Hz
AQ       4.0894966 sec
RG       31.56
DW       62.400 usec
DE       6.50 usec
TE       291.6 K
D1       1.00000000 sec
TD0      1

===== CHANNEL f1 =====
SFO1    400.1522008 MHz
NUC1     1H
P1      10.75 usec
SI      65536
SF      400.1499526 MHz
WDW     EM
SSB     0
LB      0.30 Hz
GB      0
PC      1.00
    
```

M-9

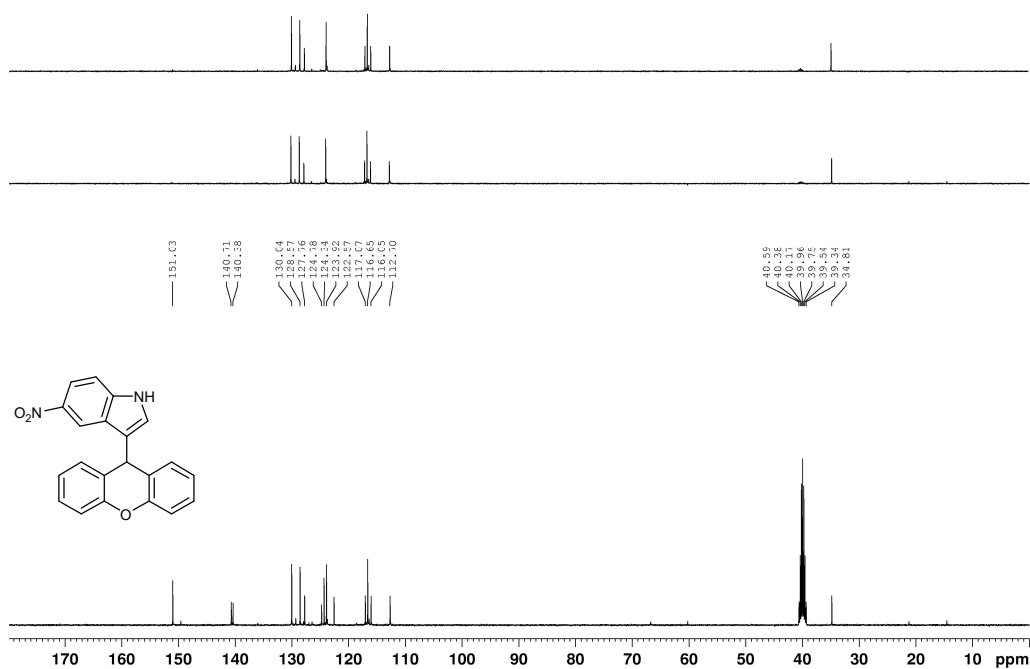

# <sup>1</sup>H-NMR and <sup>13</sup>C-NMR spectral of compound 4ah

M-19

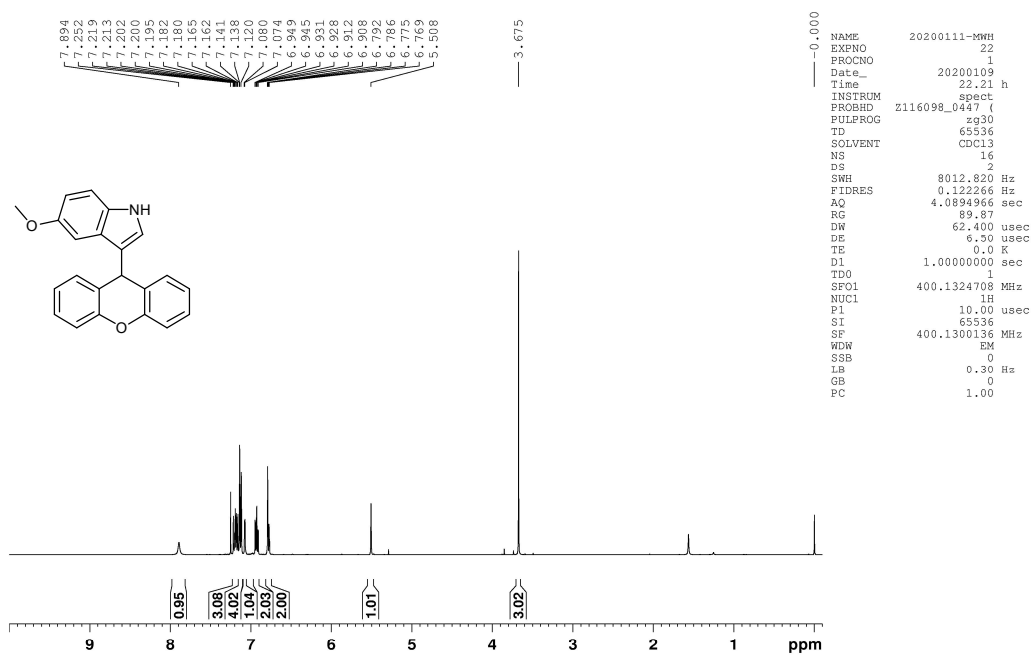

M-19

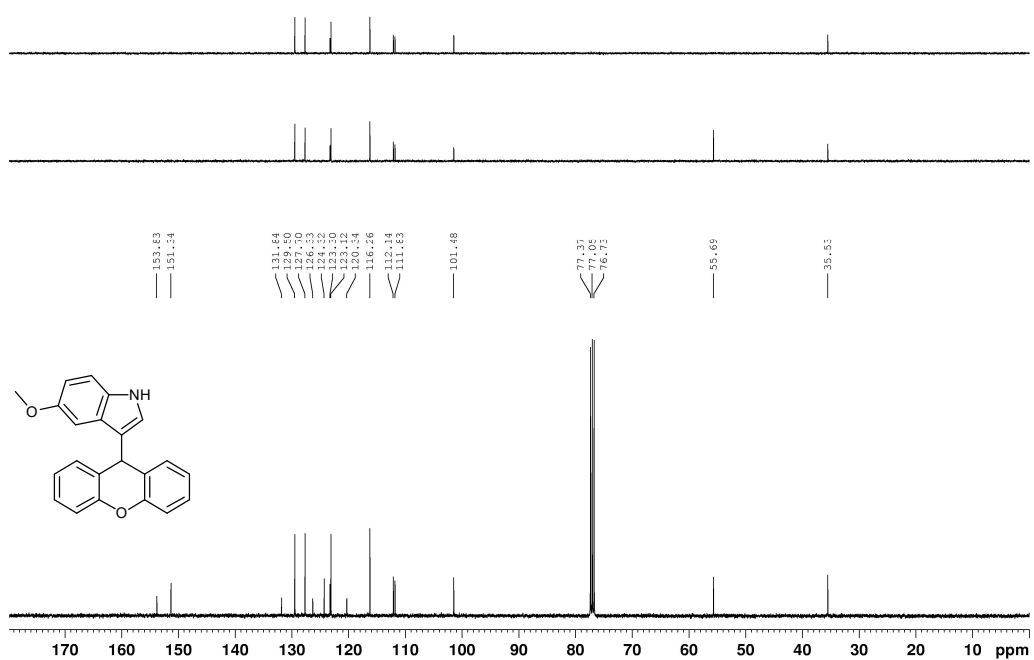



# <sup>1</sup>H-NMR and <sup>13</sup>C-NMR spectral of compound 4aj

M-17

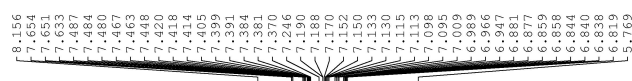

```

NAME      20200111-MWH
EXPNO     50
PROCNO    1
Date_     20200110
Time      5.22 h
INSTRUM   spect
PROBHD    Z116098_0447 (
PULPROG   zg30
TD         65536
SOLVENT   CDCl3
NS         16
DS         2
SWH       8012.820 Hz
FIDRES    0.122266 Hz
AQ         4.0894966 sec
RG         79.48
DW         62.400 usec
DE         6.50 usec
TE         0.0 K
D1         1.00000000 sec
TDO        1
SF01      400.1324708 MHz
NUC1       1H
P1         10.00 usec
SI         65536
SF         400.1300161 MHz
WDW        EM
SSB         0
LB         0.30 Hz
GB         0
PC         1.00
    
```

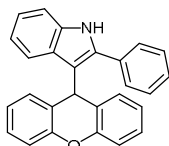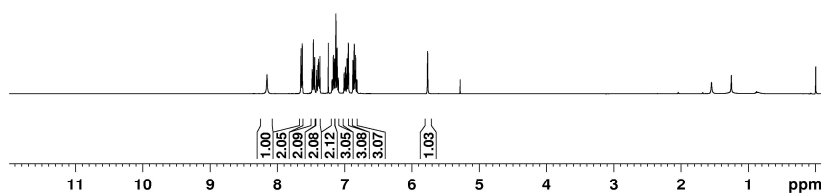

M-17

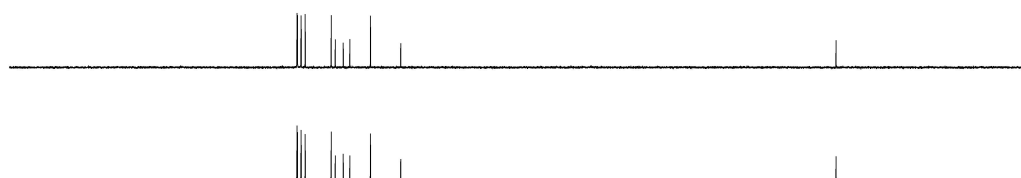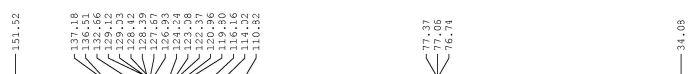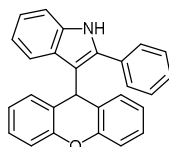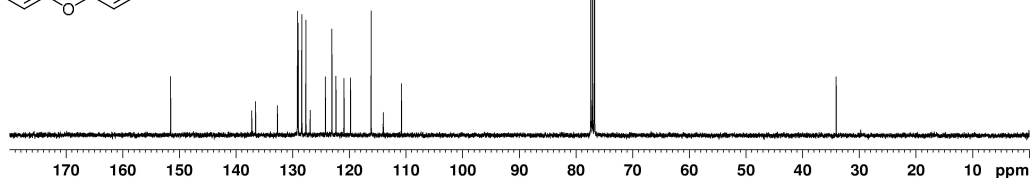

# <sup>1</sup>H-NMR and <sup>13</sup>C-NMR spectral of compound 4ak

M-18

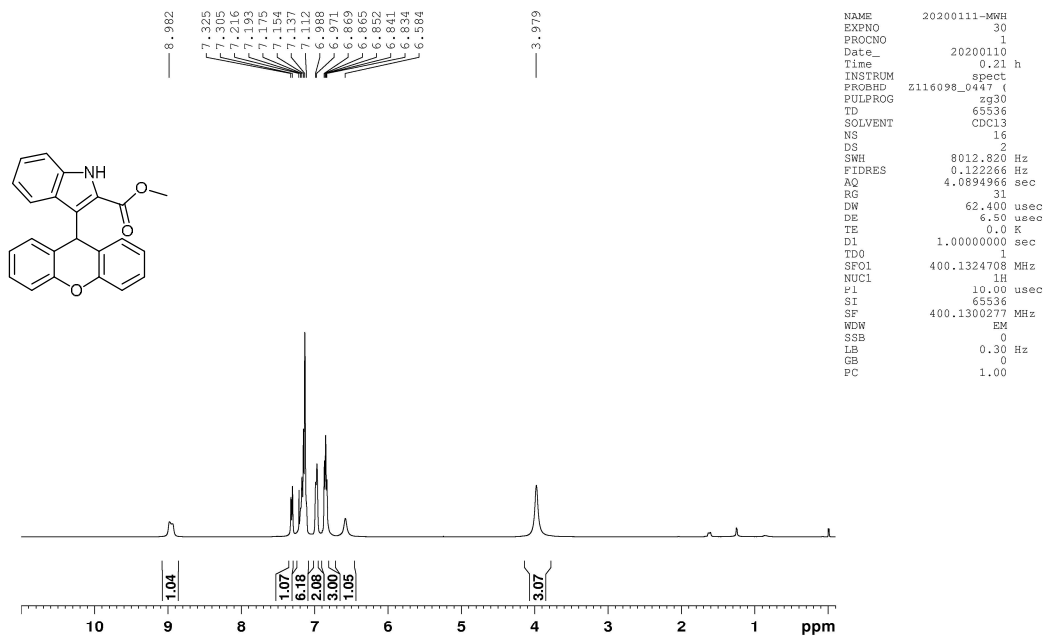

M-18

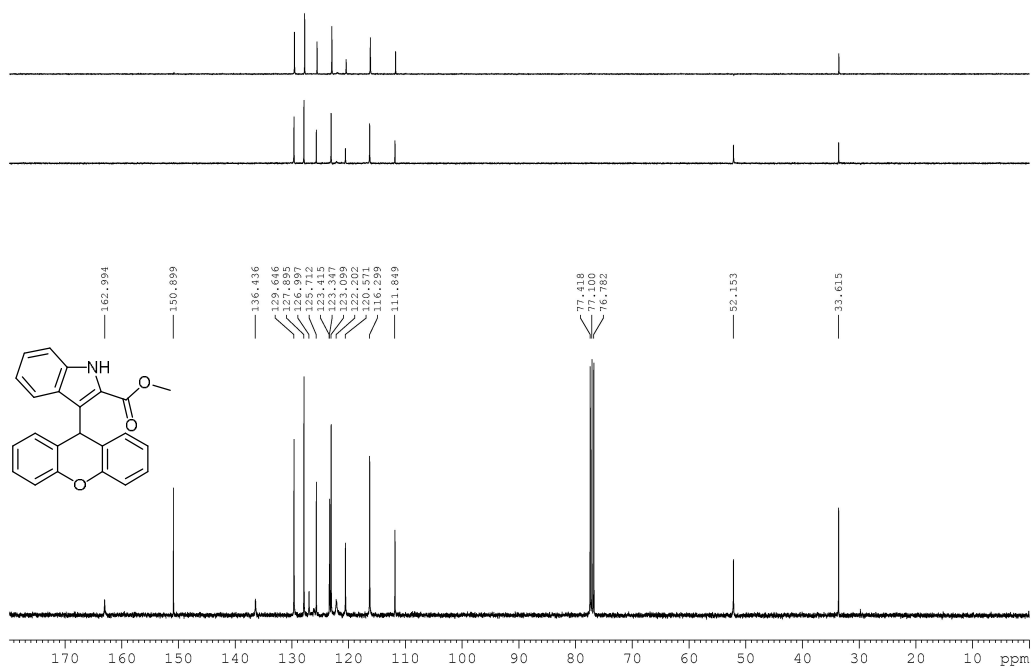

# <sup>1</sup>H-NMR and <sup>13</sup>C-NMR spectral of compound 4al

M-1

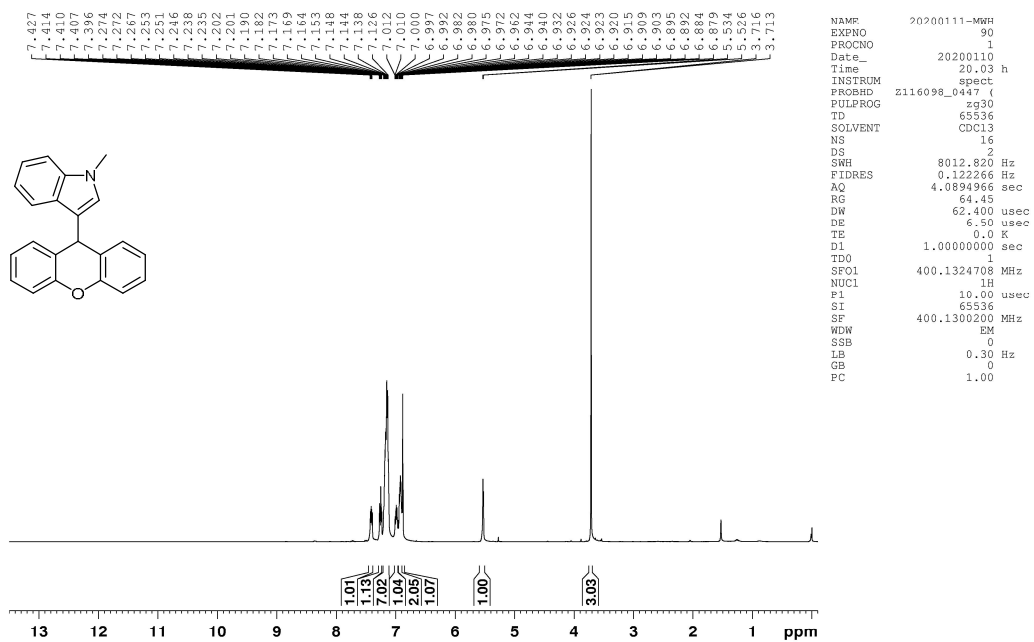

# <sup>1</sup>H-NMR and <sup>13</sup>C-NMR spectral of compound 4am

M-8

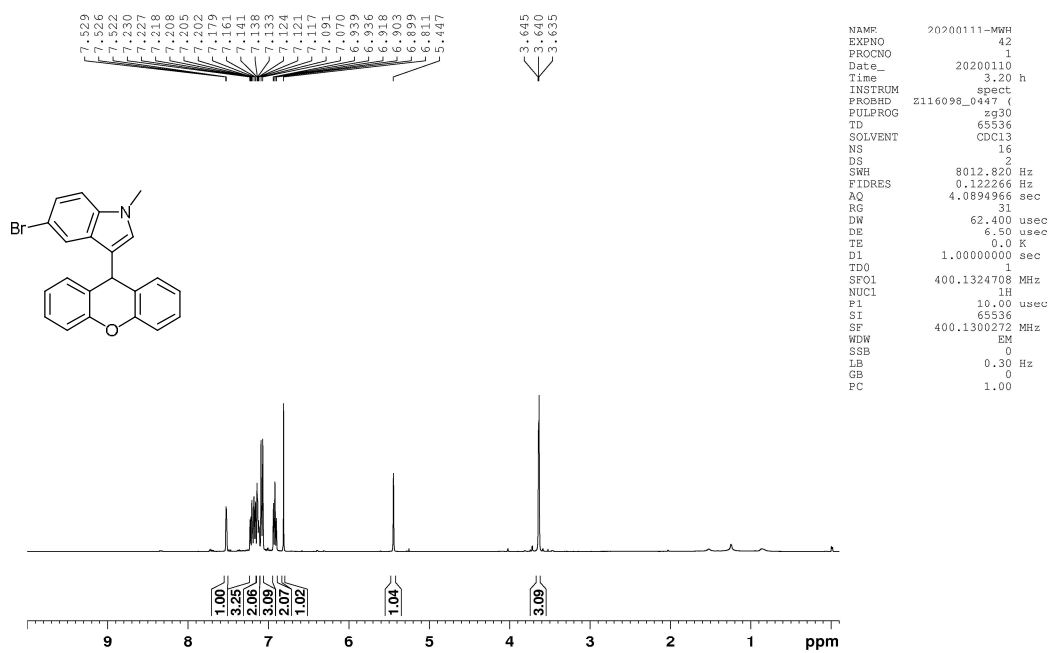

M-8

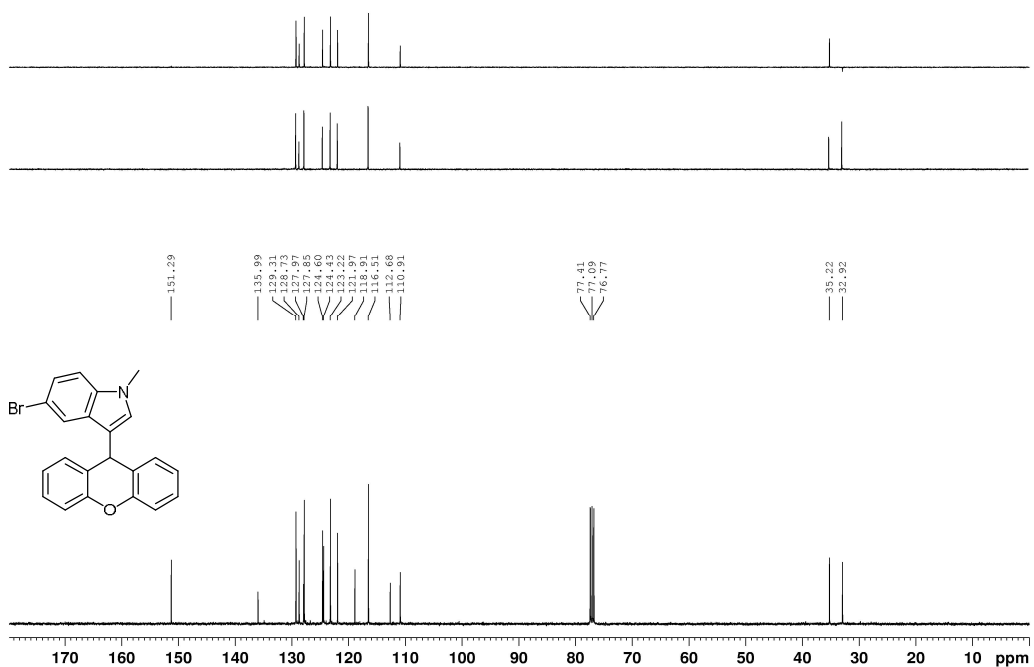



# <sup>1</sup>H-NMR and <sup>13</sup>C-NMR spectral of compound 4bb

MW-11

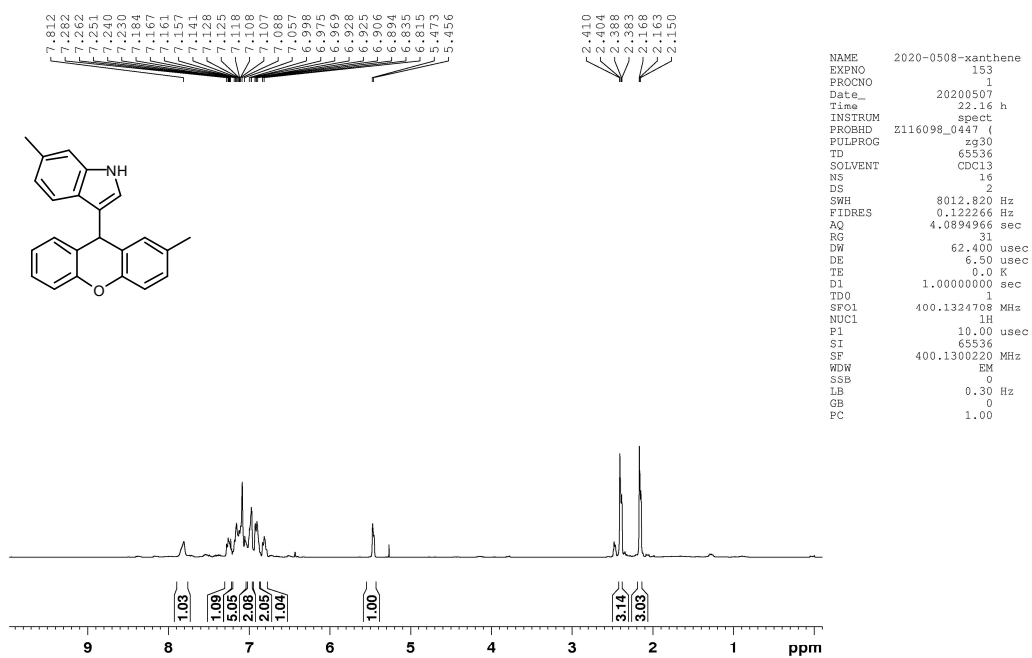

MW-11

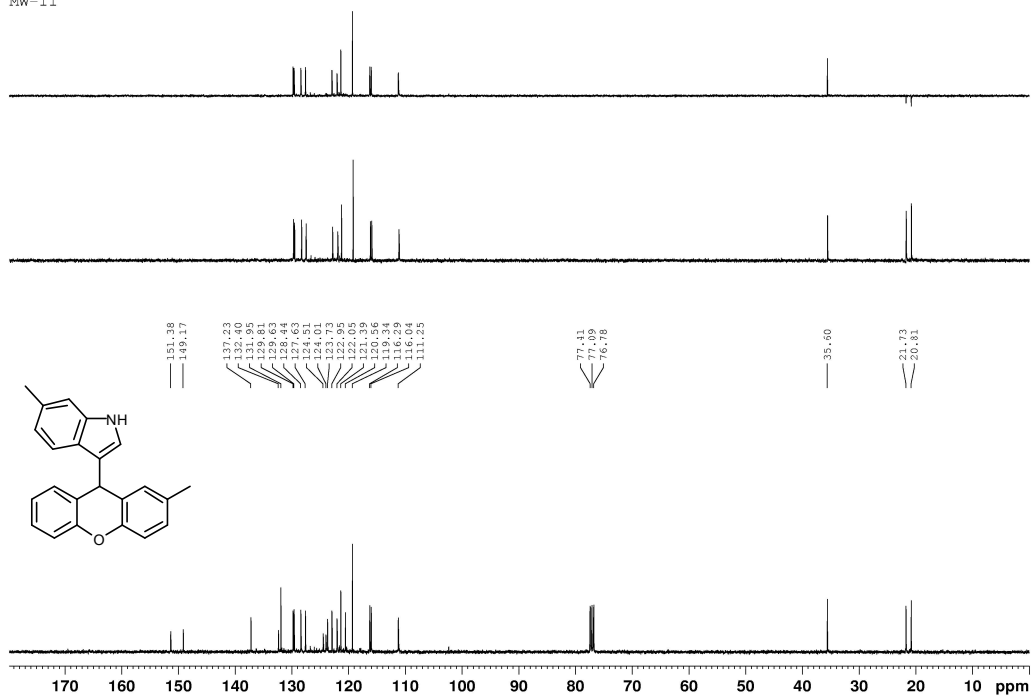

# <sup>1</sup>H-NMR and <sup>13</sup>C-NMR spectral of compound 4ca

MW-10

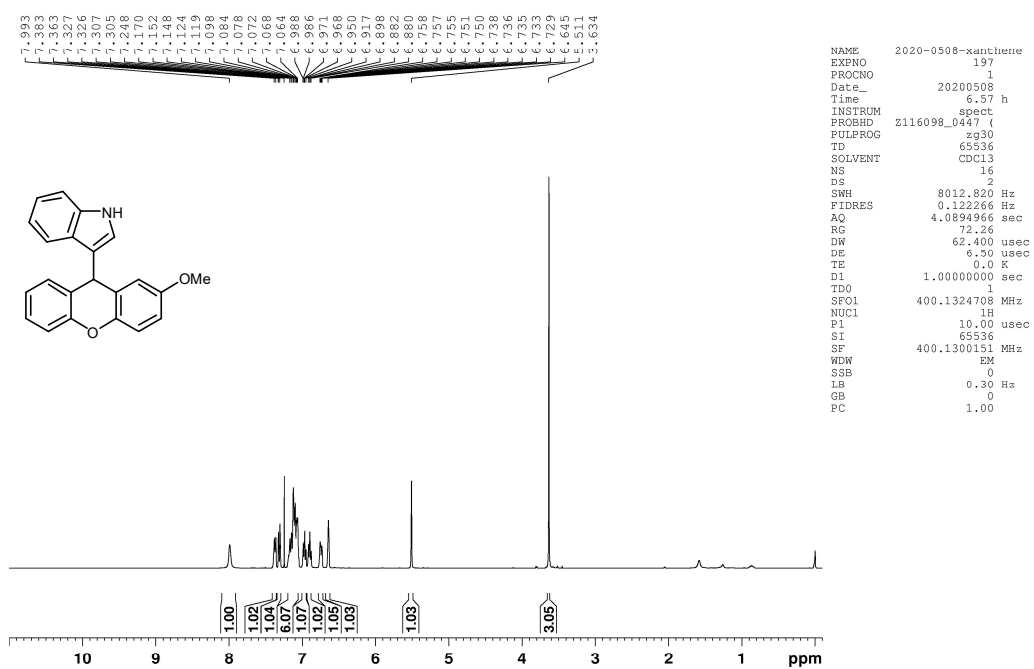

MW-10

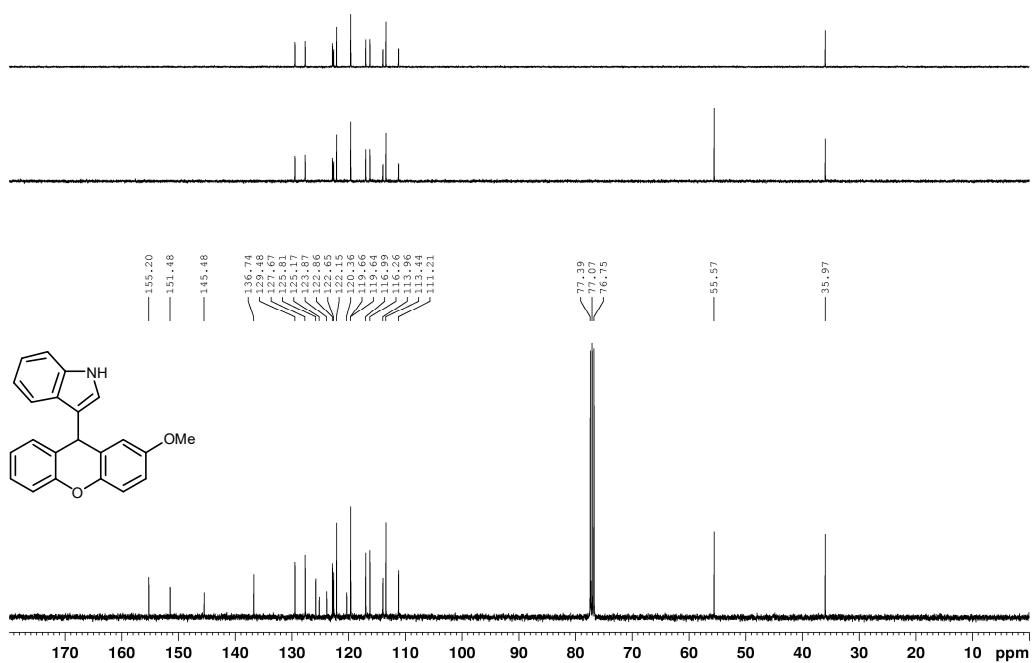

# <sup>1</sup>H-NMR and <sup>13</sup>C-NMR spectral of compound 4dh

MW-9

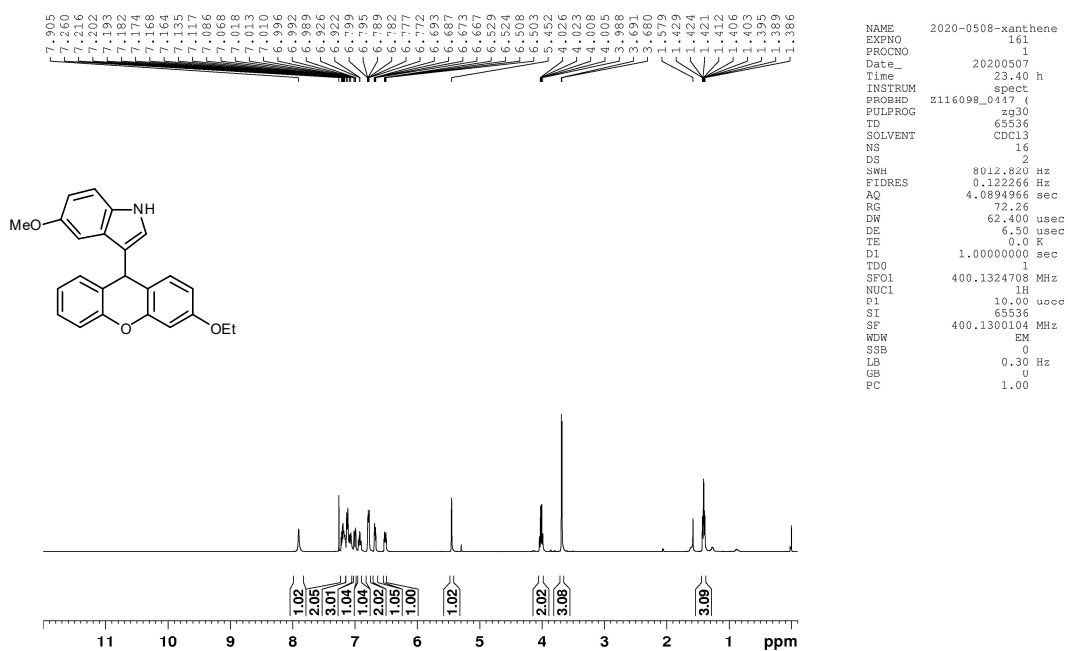

MW-9

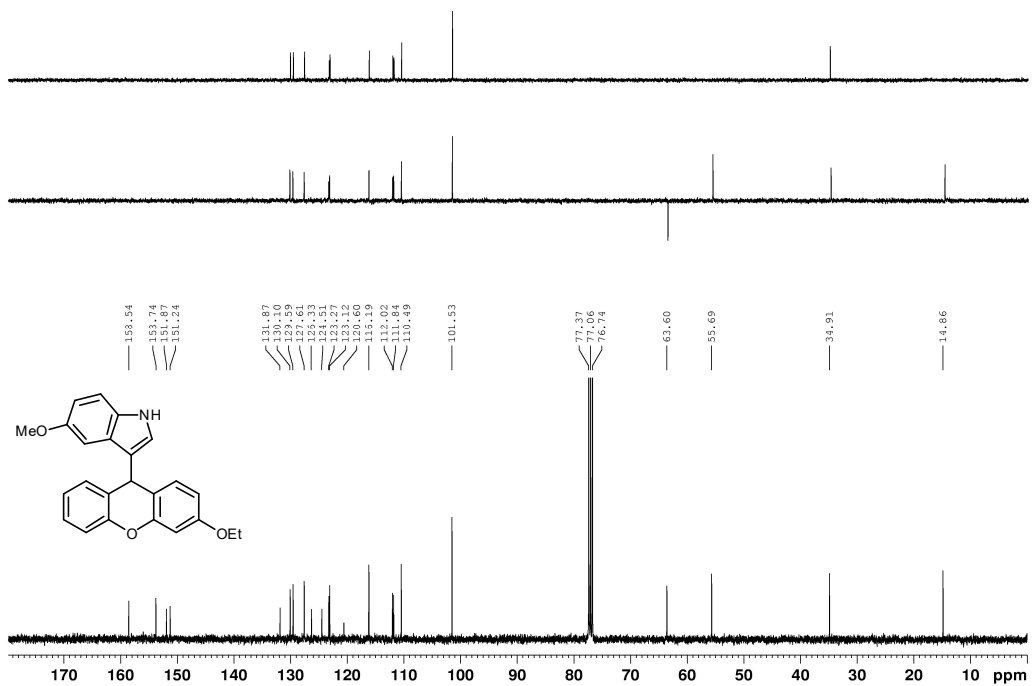

# <sup>1</sup>H-NMR and <sup>13</sup>C-NMR spectral of compound 4ea

MW-13

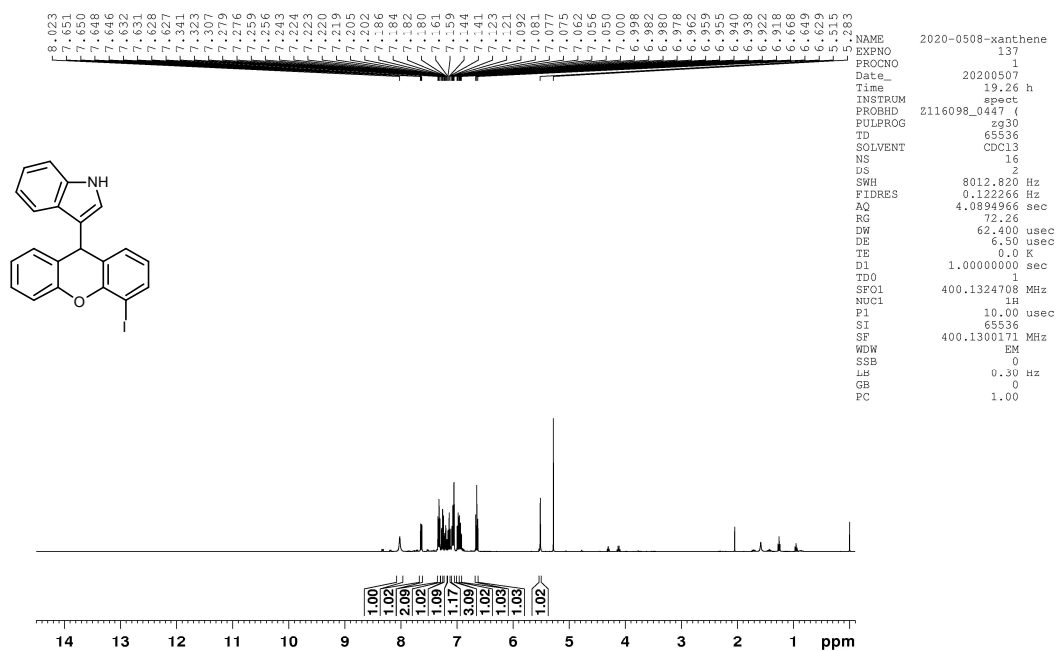

MW-13

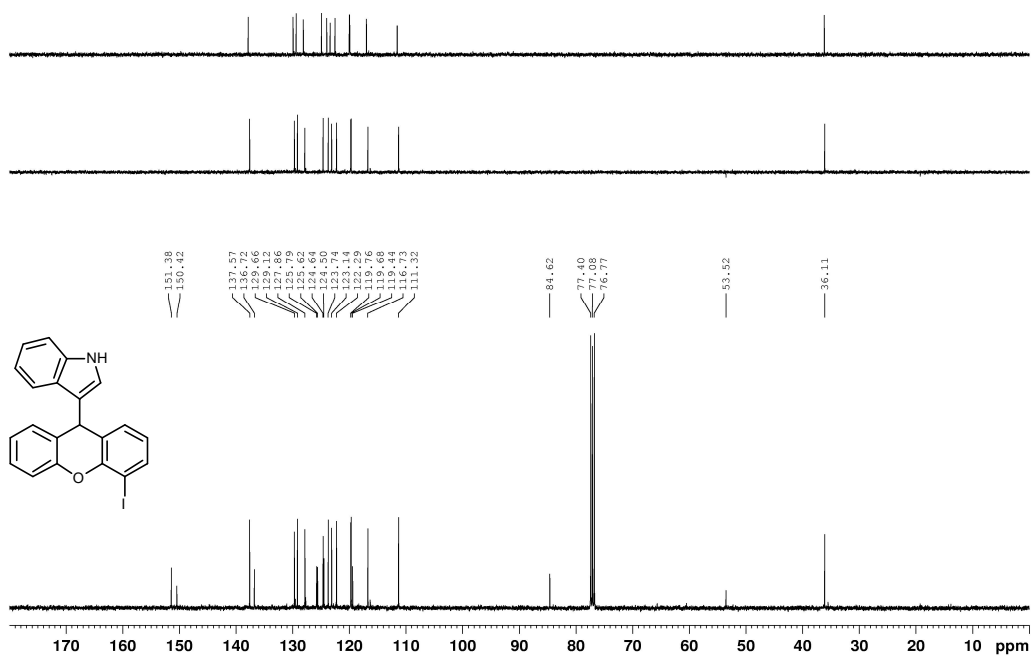

# <sup>1</sup>H-NMR and <sup>13</sup>C-NMR spectral of compound 4fa

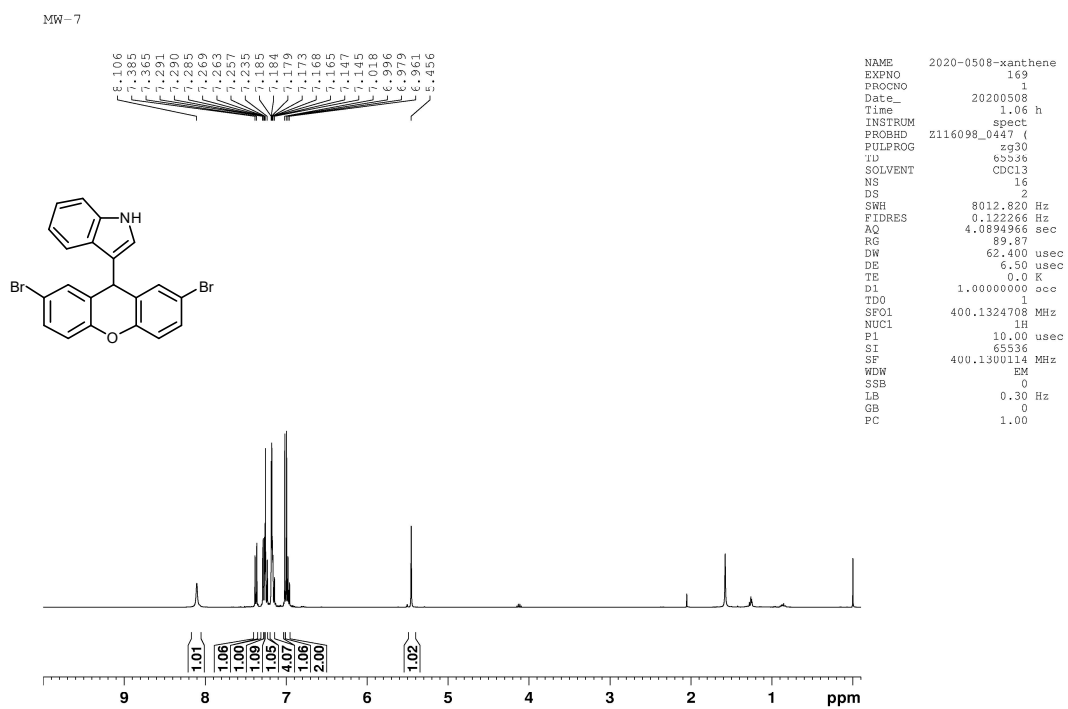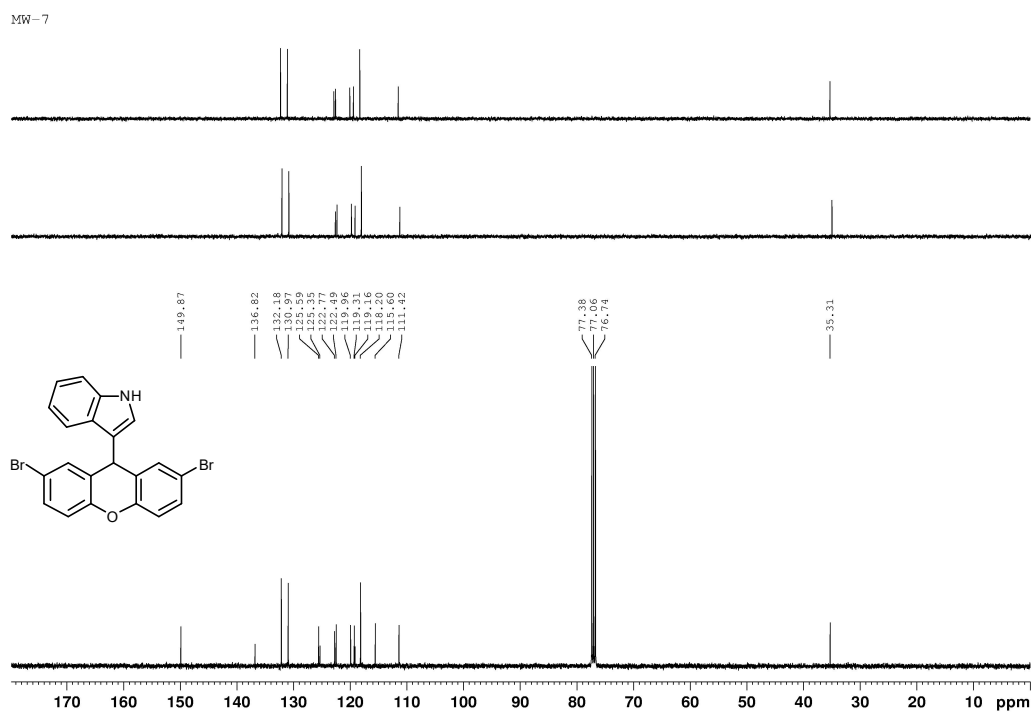

# <sup>1</sup>H-NMR and <sup>13</sup>C-NMR spectral of compound 4fe

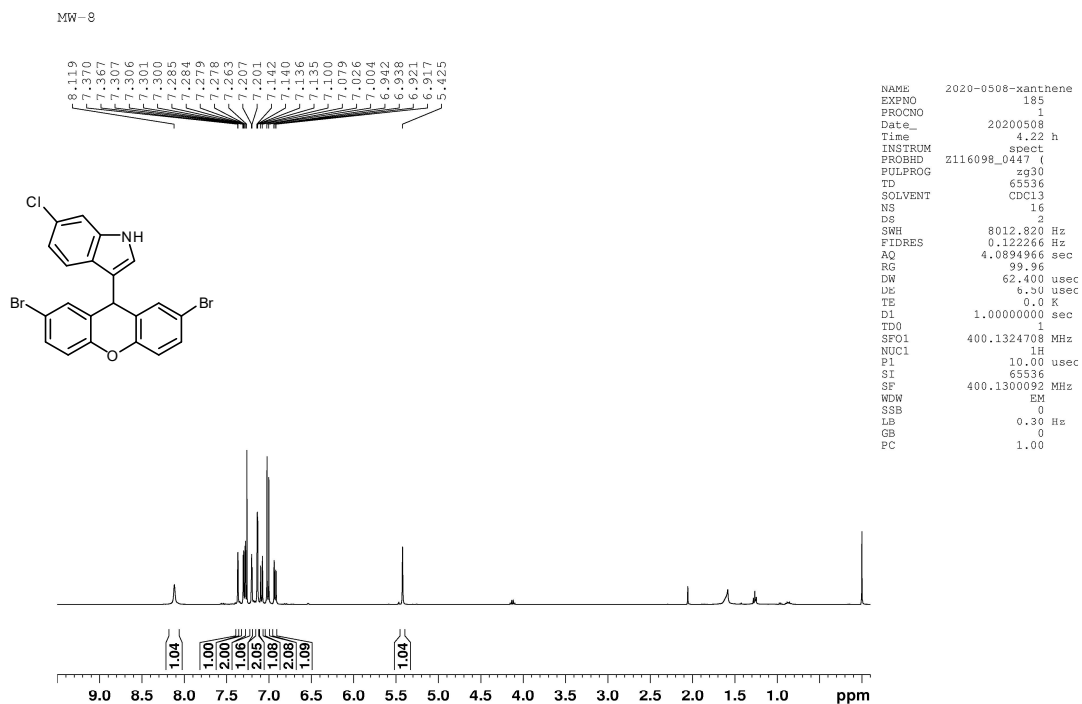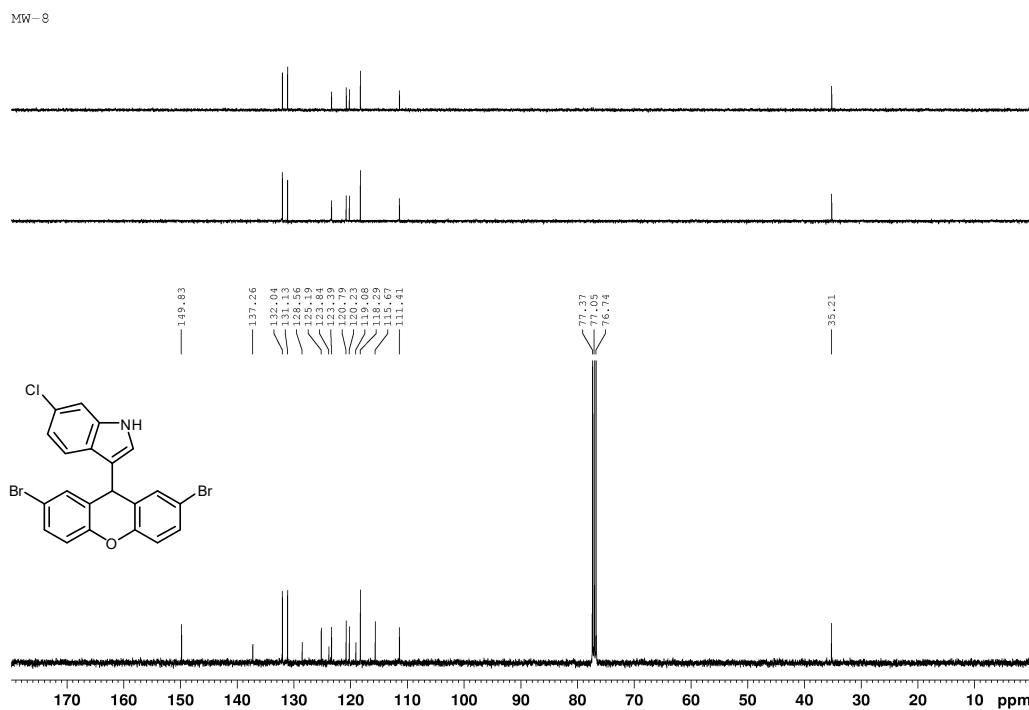

# <sup>1</sup>H-NMR and <sup>13</sup>C-NMR spectral of compound 4gh

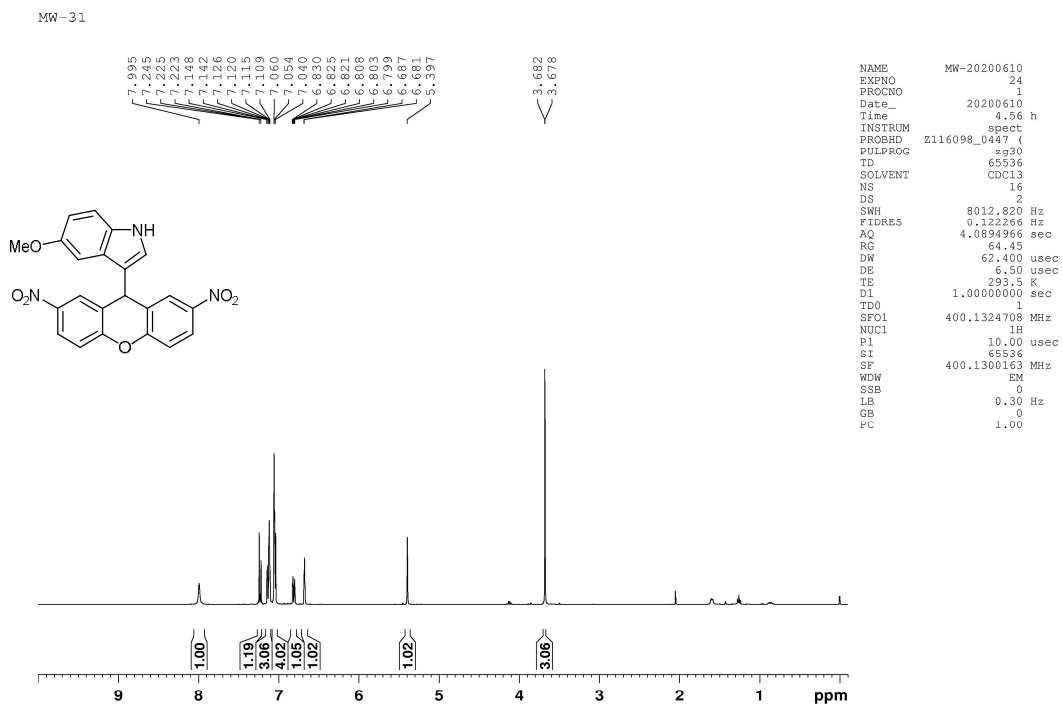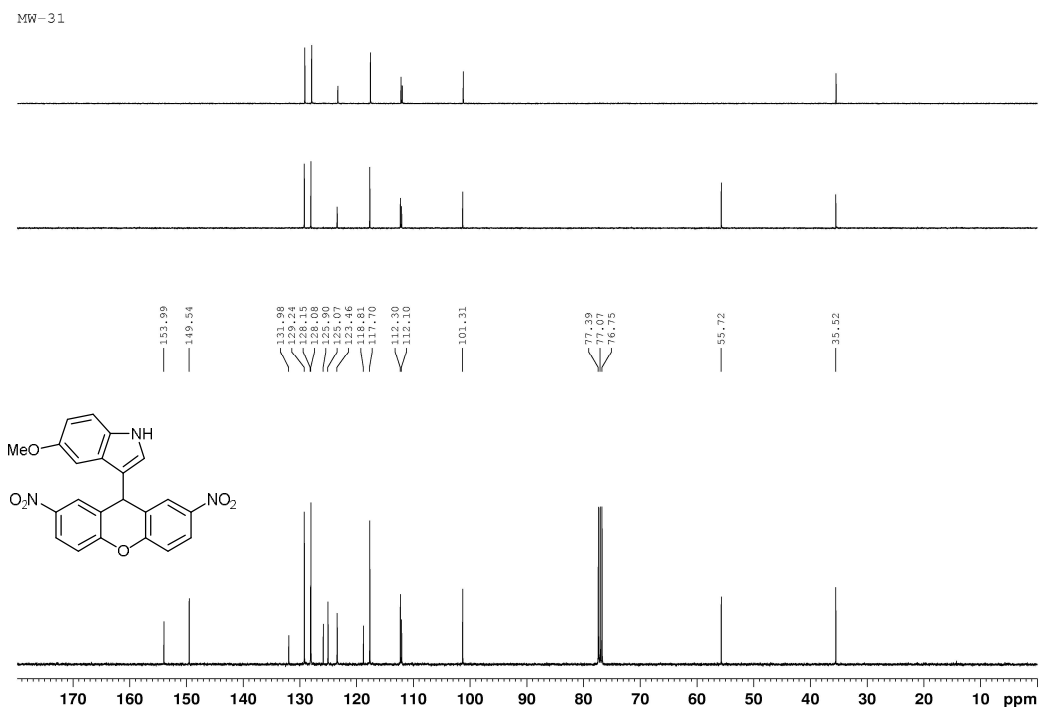

# <sup>1</sup>H-NMR and <sup>13</sup>C-NMR spectral of compound 5aa

M-16

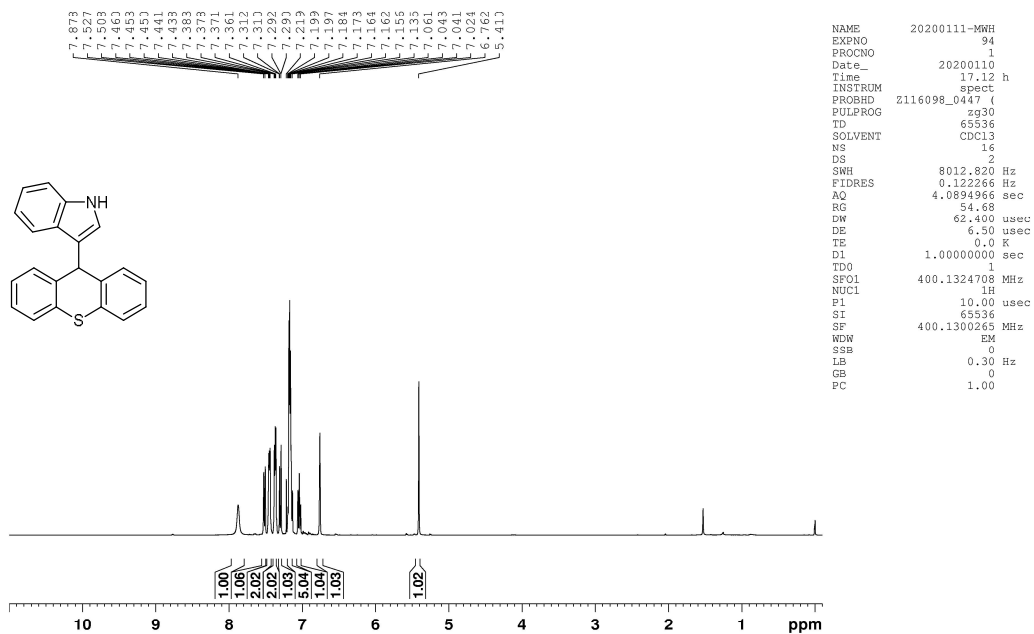

M-16

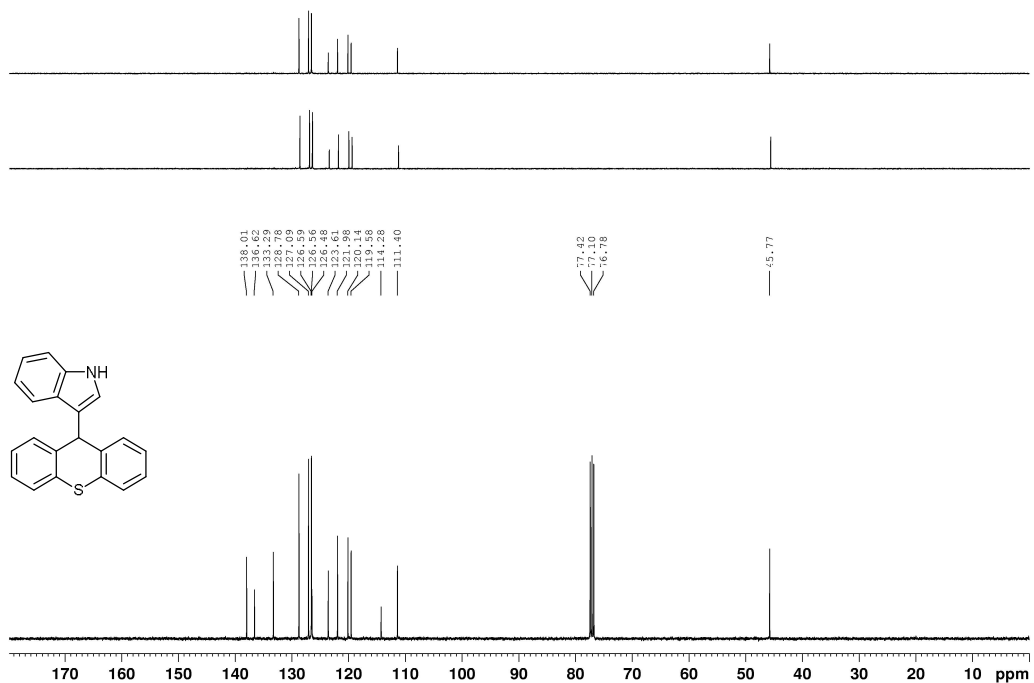



# <sup>1</sup>H-NMR and <sup>13</sup>C-NMR spectral of compound 5ah

M-23

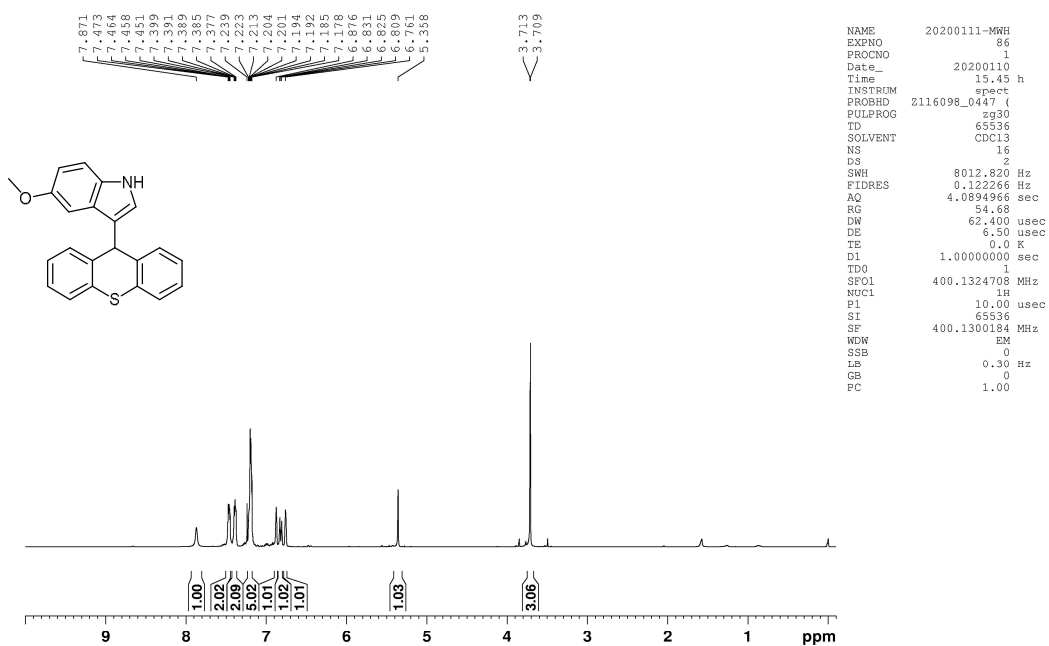

M-23

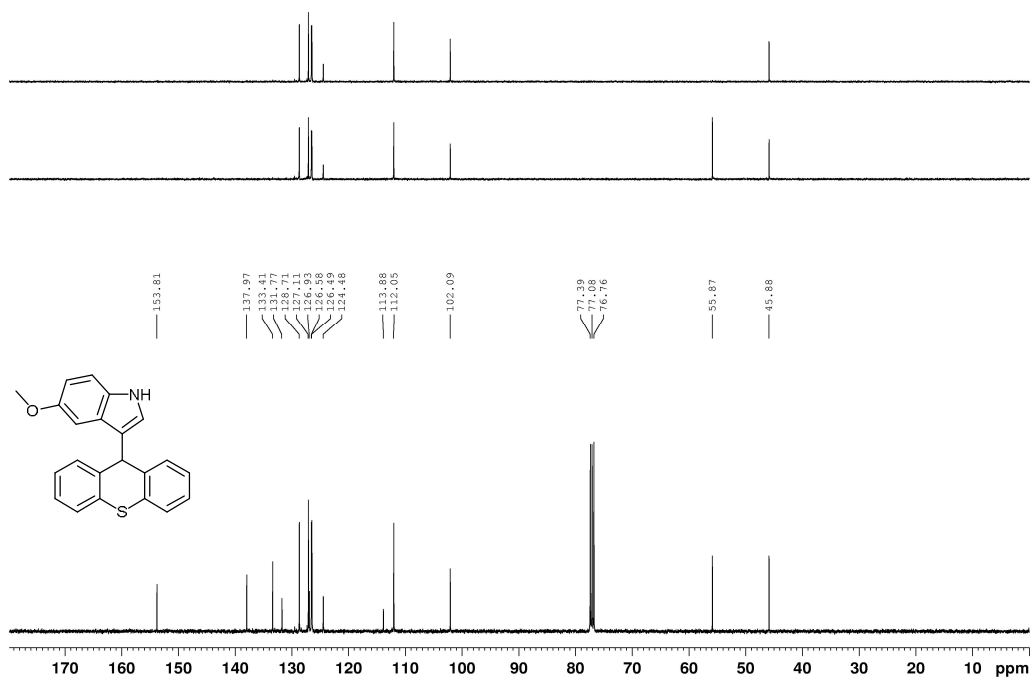

# <sup>1</sup>H-NMR and <sup>13</sup>C-NMR spectral of compound 5ai

M-22

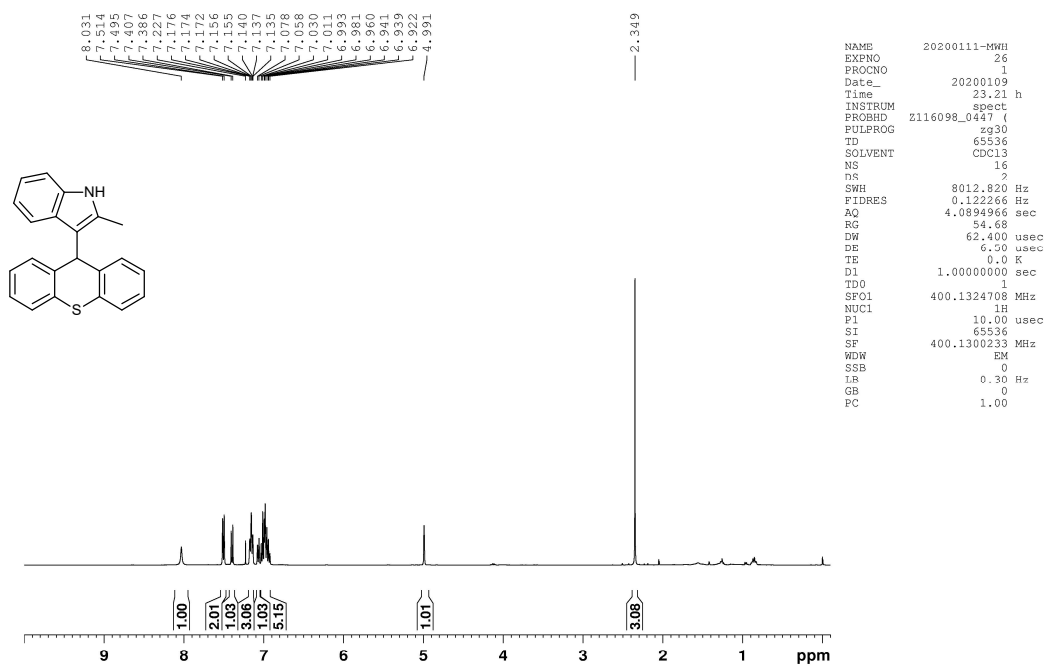

M-22

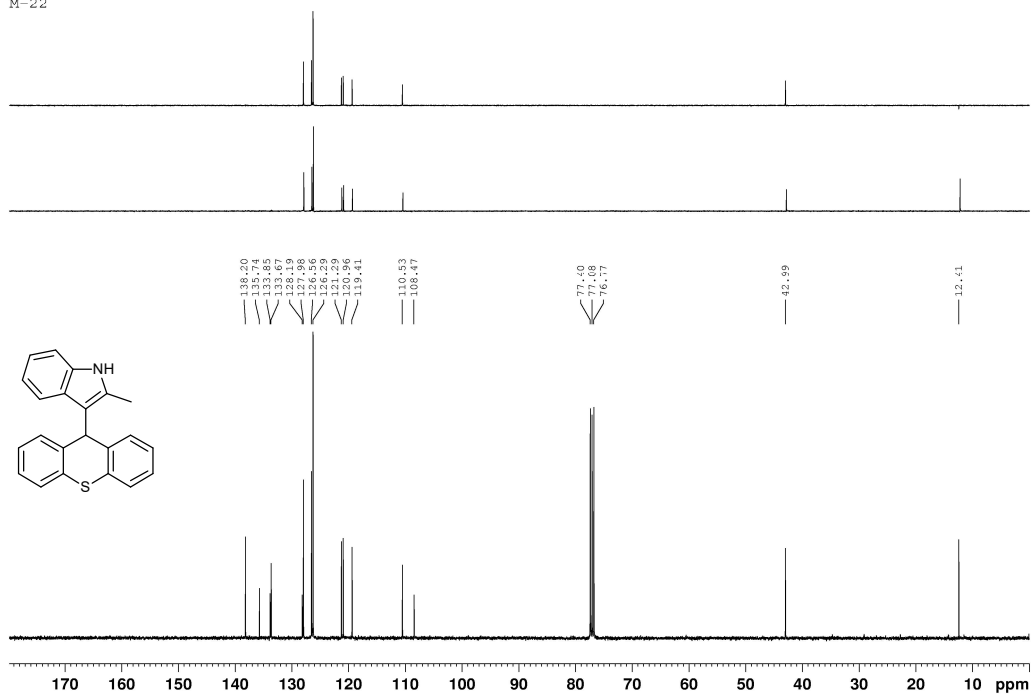

# <sup>1</sup>H-NMR and <sup>13</sup>C-NMR spectral of compound 5am

M-20

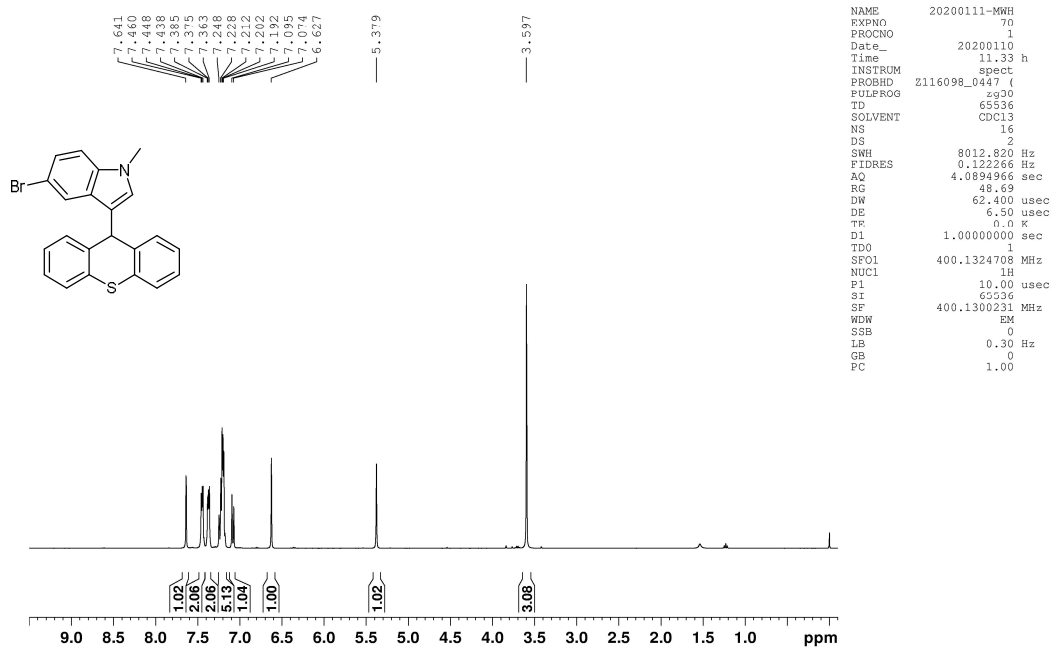

M-20

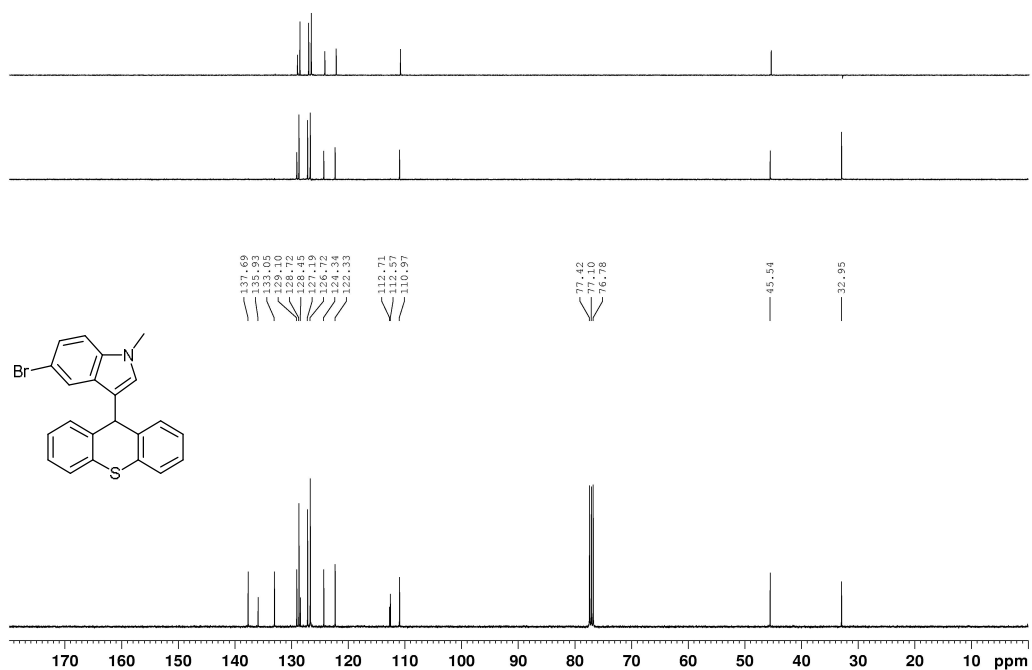

# <sup>1</sup>H-NMR and <sup>13</sup>C-NMR spectral of compound 5ap

M-24

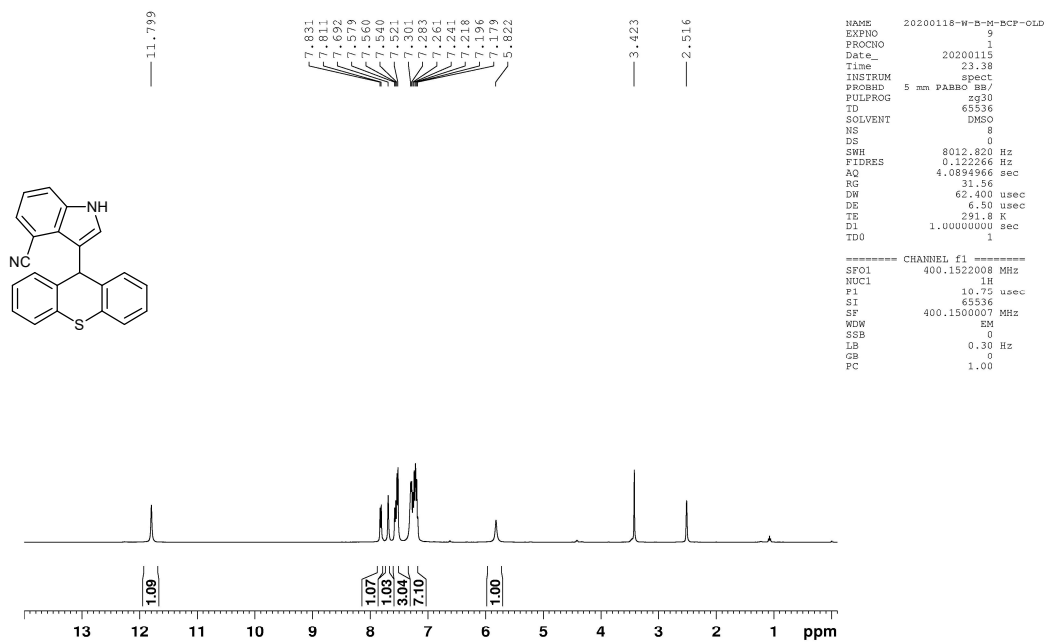

```

NAME      20200118-W-B-M-BCP-OLD
EXPNO     9
PROCNO    1
Date_     20200115
Time      23.38
INSTRUM   spect
PROBHD    5 mm PABBO BB/
PULPROG   zg30
TD         65536
SOLVENT   DMSO
NS         8
DS         0
SWH        8012.820 Hz
FIDRES     0.122266 Hz
AQ         4.0834966 sec
RG         31.56
DW         62.400 usec
DE         6.50 usec
TE         291.8 K
D1         1.0000000 sec
TD0        1

===== CHANNEL f1 =====
SFO1      400.1522008 MHz
NUC1      1H
P1         10.75 usec
SI         65536
SF         400.1500007 MHz
WDW        EM
SSB        0
LB         0.30 Hz
GB         0
PC         1.00
    
```

M-24

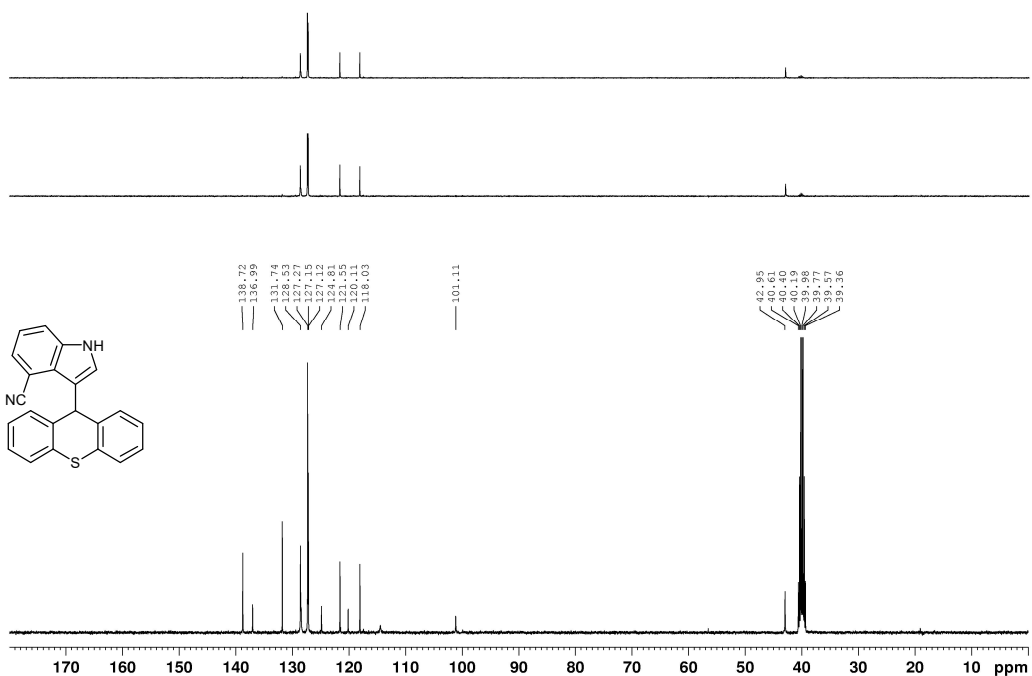

# <sup>1</sup>H-NMR and <sup>13</sup>C-NMR spectral of compound 5aq

M-21

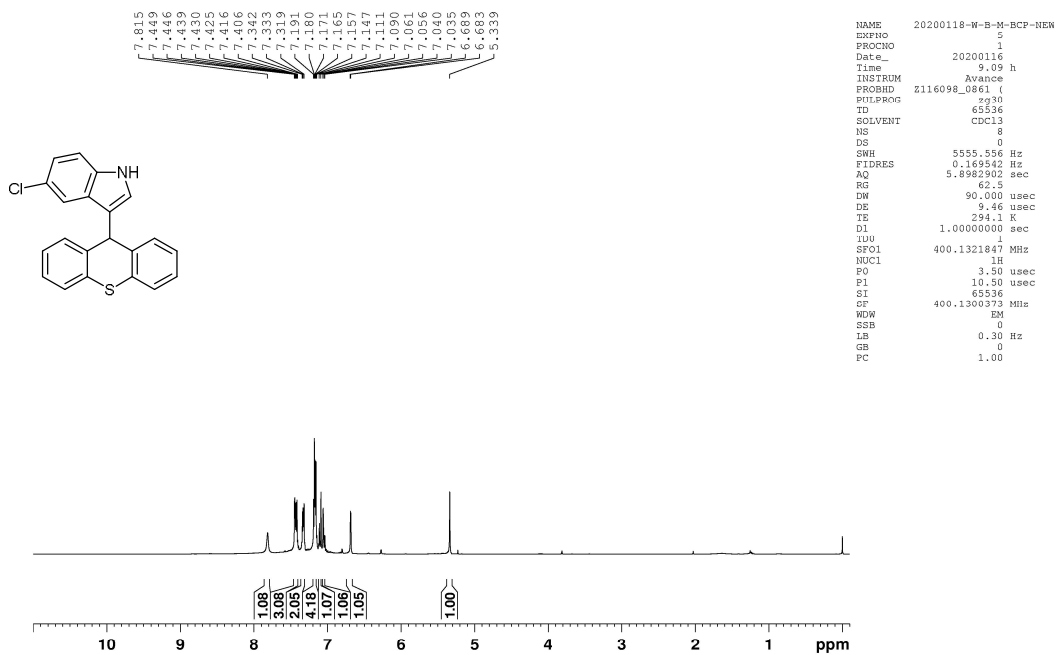

```

NAME      20200118-W-B-M-BCP-NEW
EXPNO    5
PROCNO   1
Date_    20200116
Time     9.09 h
INSTRUM  Avance
PROBHD   z116098_0861 (
PULPROG  zg30
TD        65536
SOLVENT  CDCl3
NS        8
DS        0
SHH       5555.556 Hz
FIDRES   0.169542 Hz
AQ        5.8982502 sec
RG         62.5
DW         90.000 usec
DE         9.46 usec
TE        294.1 K
D1         1.00000000 sec
IDU        4
SFO1     400.1321847 MHz
NUC1      1H
PO         3.50 usec
P1         10.50 usec
SI         65536
SF         400.1300373 MHz
WDW       EM
SSB        0
LB         0.30 Hz
GB         0
PC         1.00
    
```

M-21

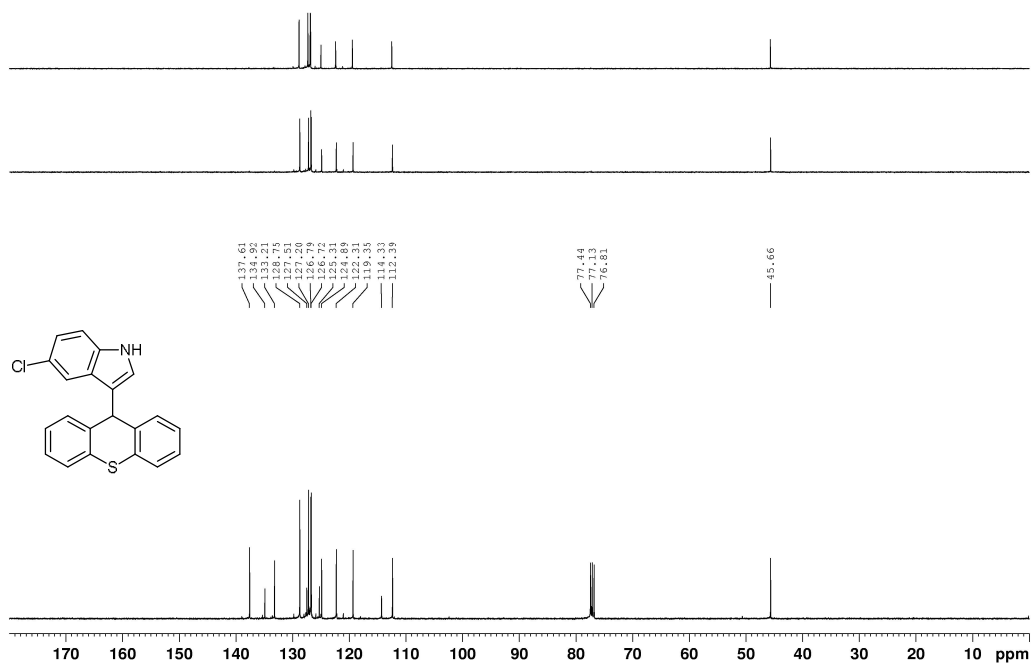

# <sup>1</sup>H-NMR and <sup>13</sup>C-NMR spectral of compound 6a

MW-17-1

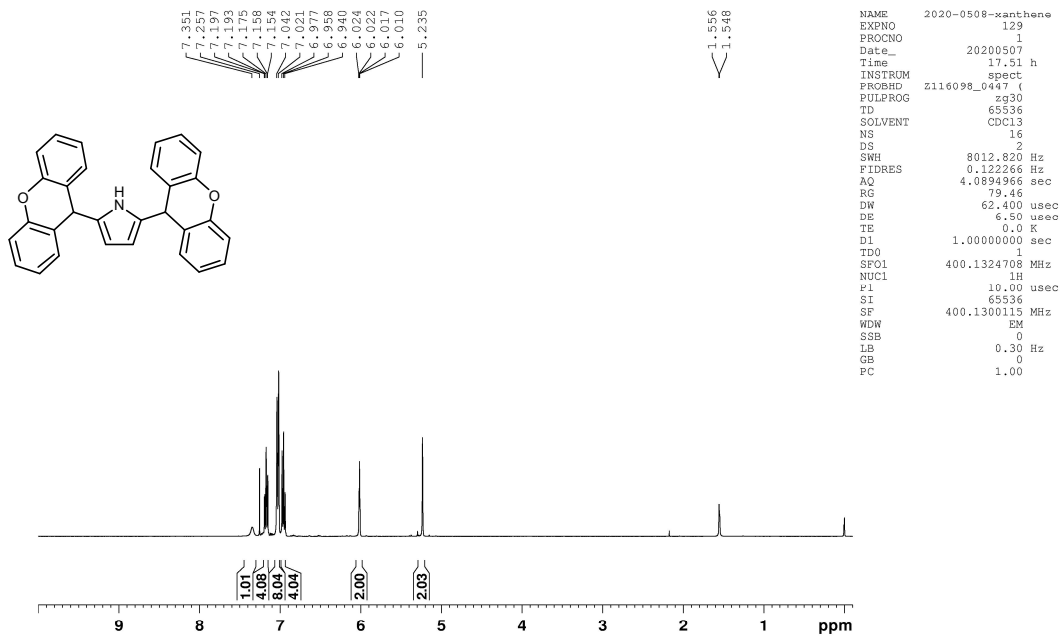

MW-17-1

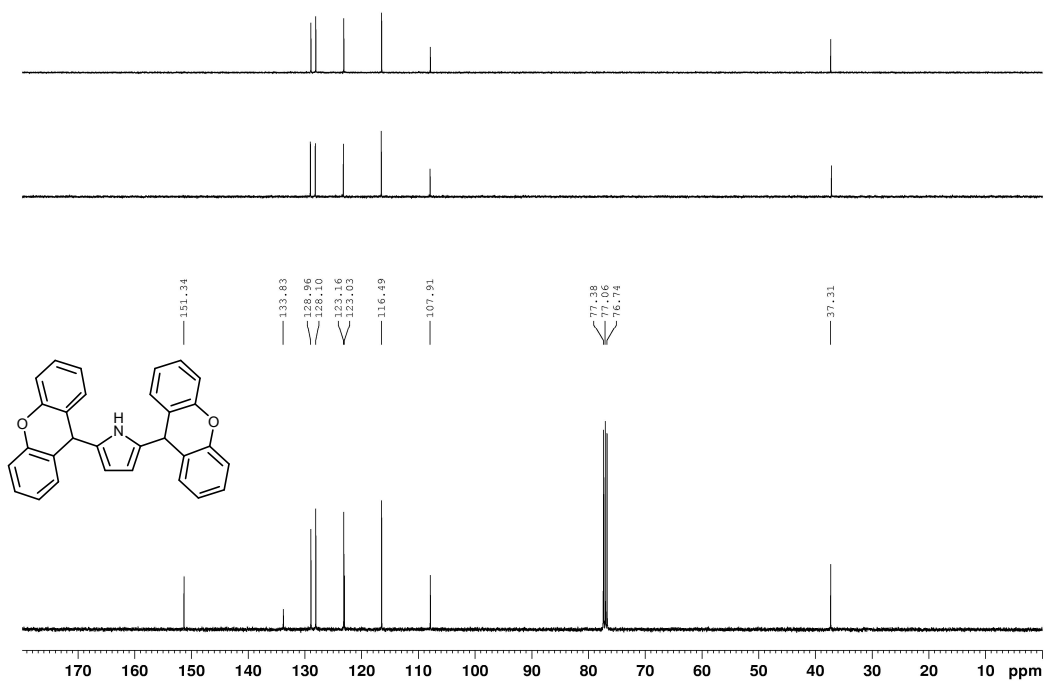

# <sup>1</sup>H-NMR and <sup>13</sup>C-NMR spectral of compound 6b

MW-15-2

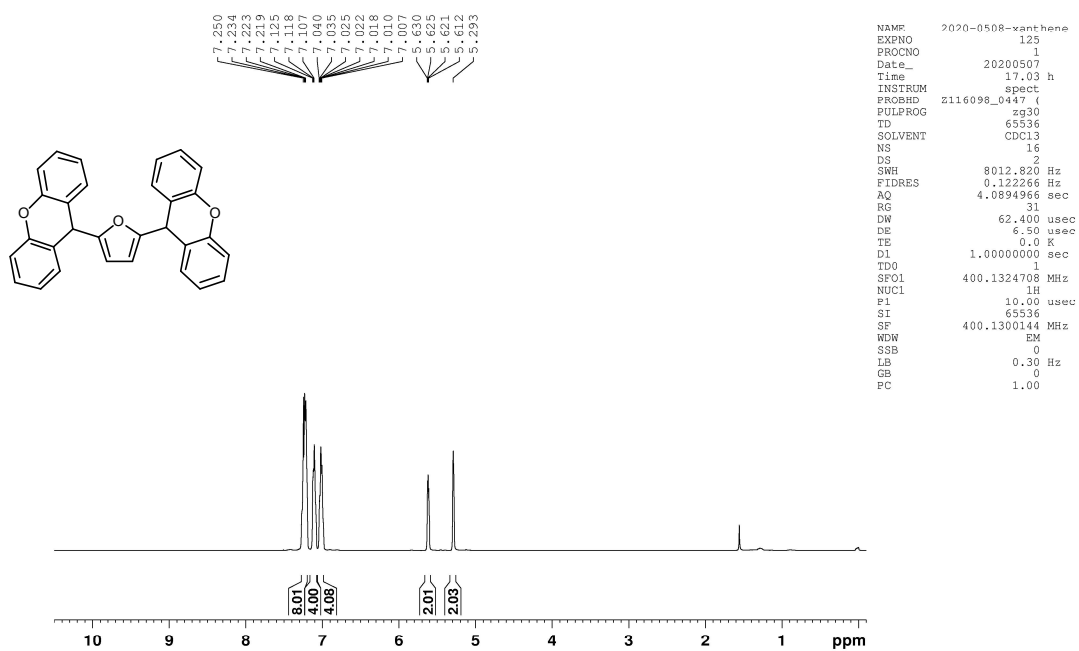

MW-15-2

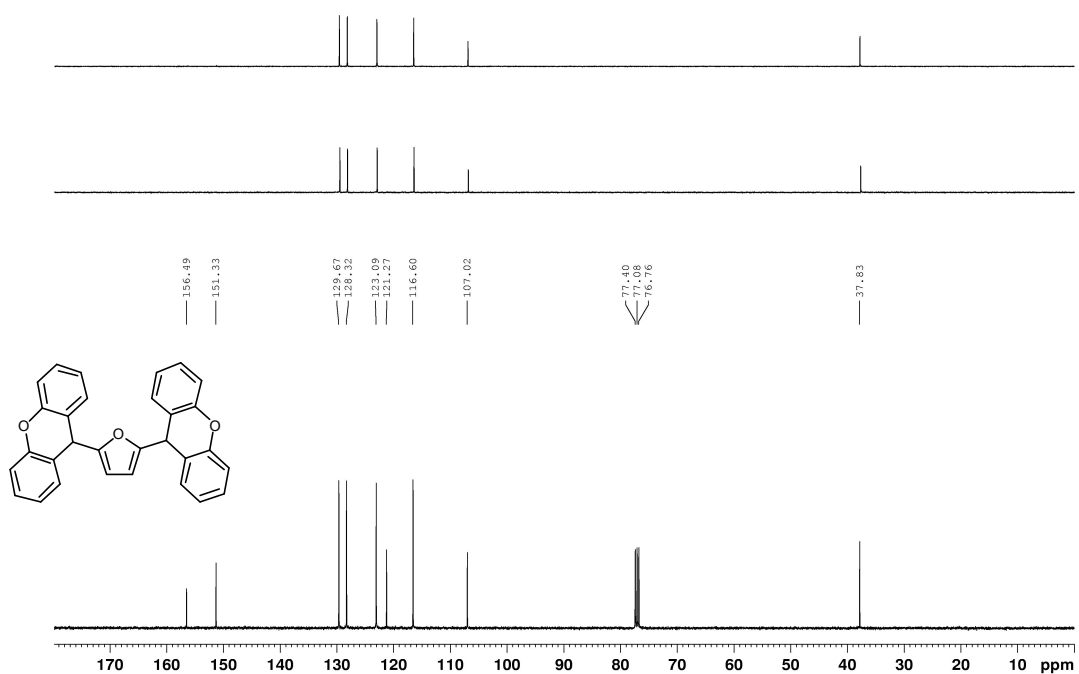

# <sup>1</sup>H-NMR and <sup>13</sup>C-NMR spectral of compound 6c

MW-17-2

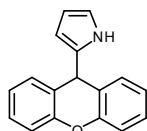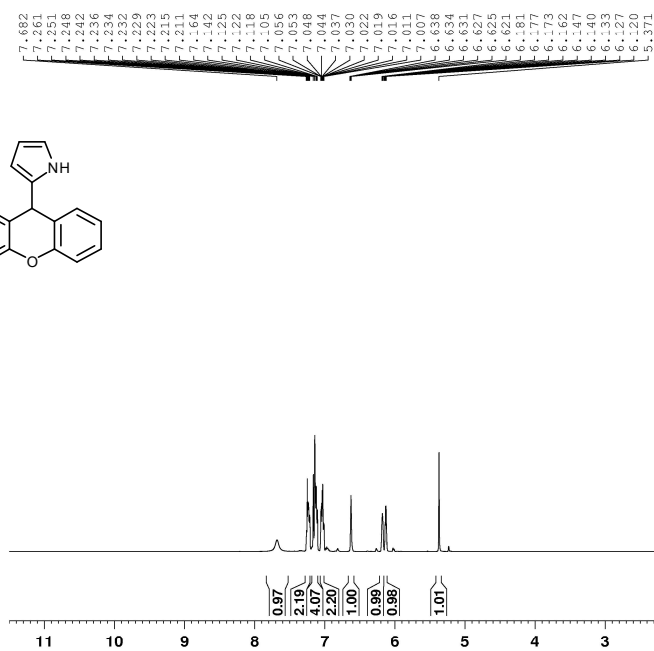

```

NAME      2020-0508-xanthene
EXPNO     141
PROCNO    1
Date_     20200507
Time      20.06 h
INSTRUM   spect
PROBHD    Z116098_0447 (
PULPROG   zg30
TD        65536
SOLVENT   CDCl3
NS        16
DS        2
SFO1      8012.820 Hz
FIDRES    0.122266 Hz
AQ         4.0894966 sec
RG         64.45
NW         62.400 usec
DE         6.50 usec
TE         0.0 K
D1         1.0000000 sec
TDO        1
SFO1      400.1324708 MHz
NUC1      1H
P1         10.00 usec
SI         65536
SF         400.1300138 MHz
WDW        EM
SSB        0
LB         0.30 Hz
GB         0
PC         1.00
    
```

MW-17-2

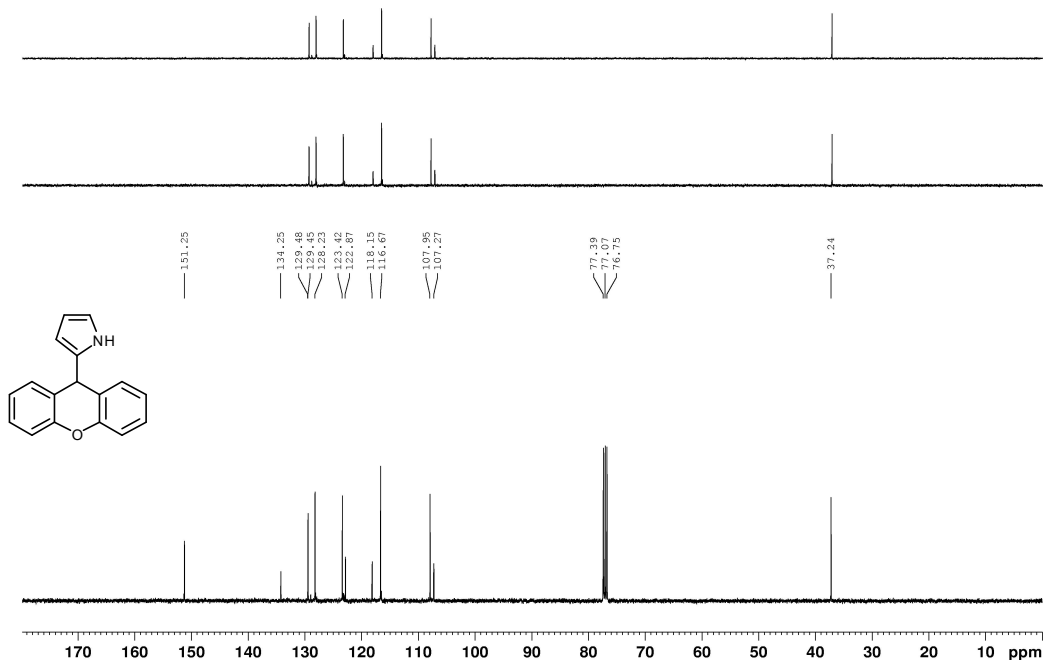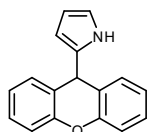



# <sup>1</sup>H-NMR and <sup>13</sup>C-NMR spectral of compound 6d

MW-15-1

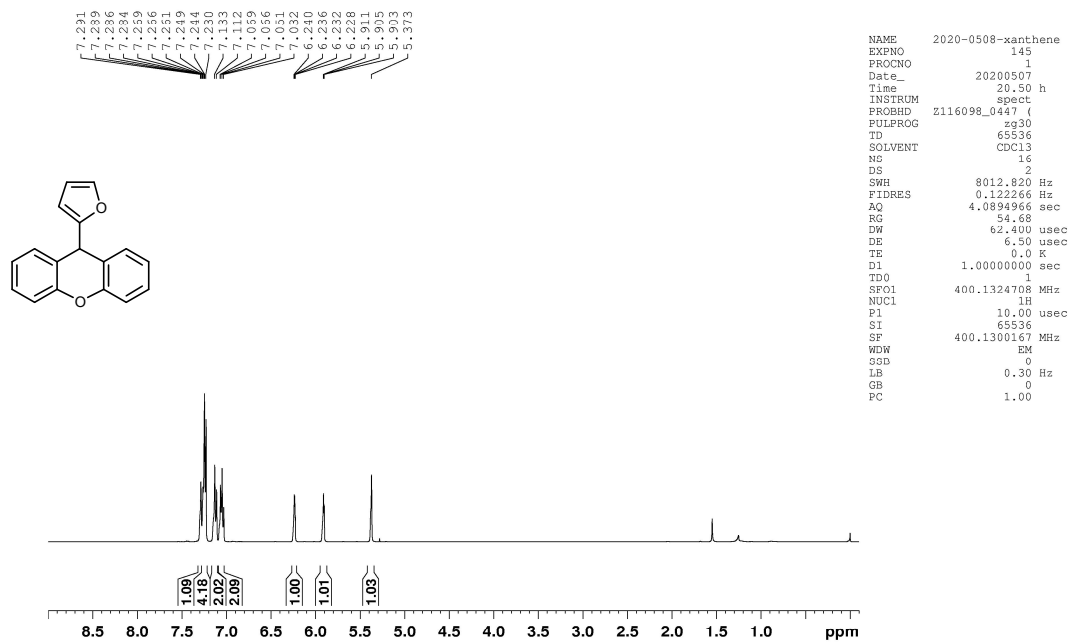

MW-15-1

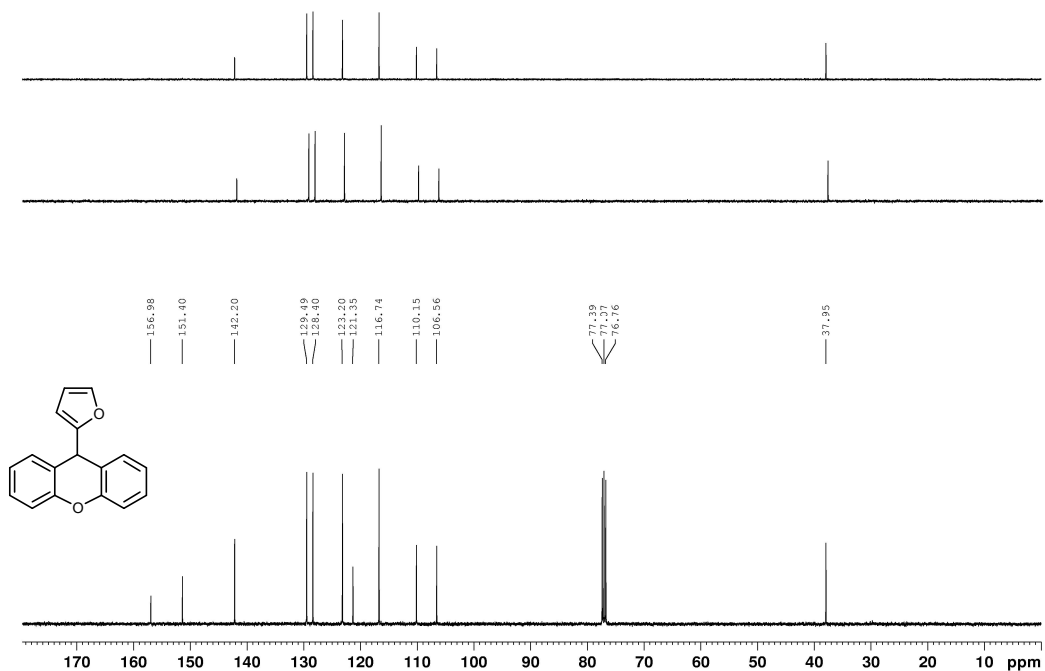

# <sup>1</sup>H-NMR and <sup>13</sup>C-NMR spectral of compound 6e

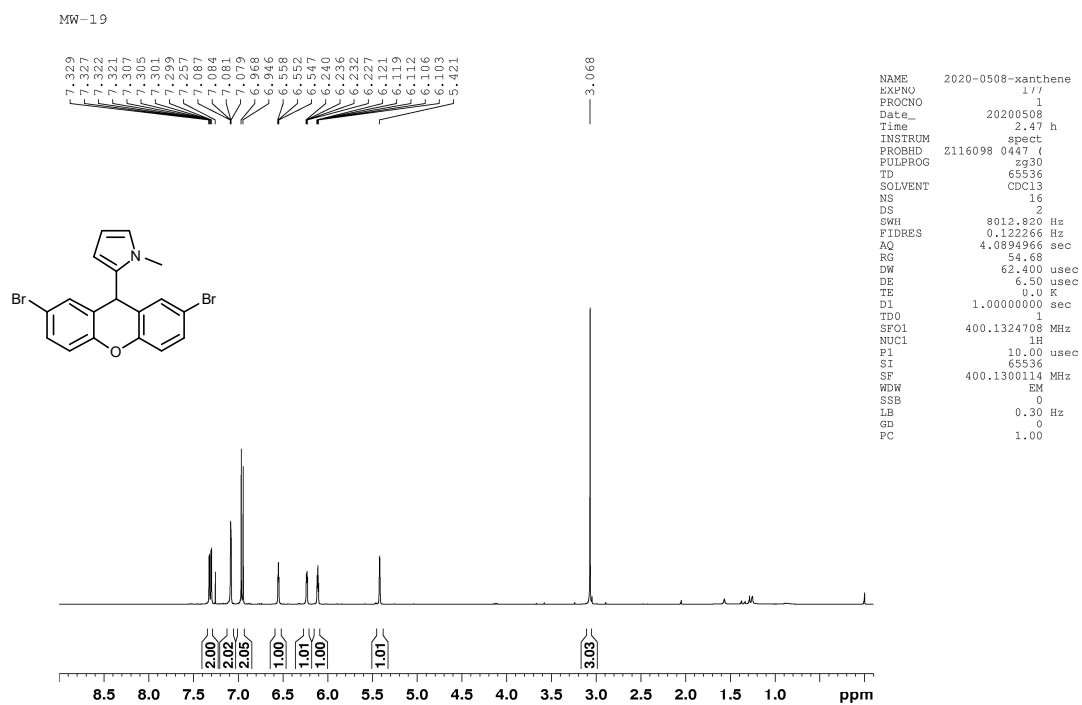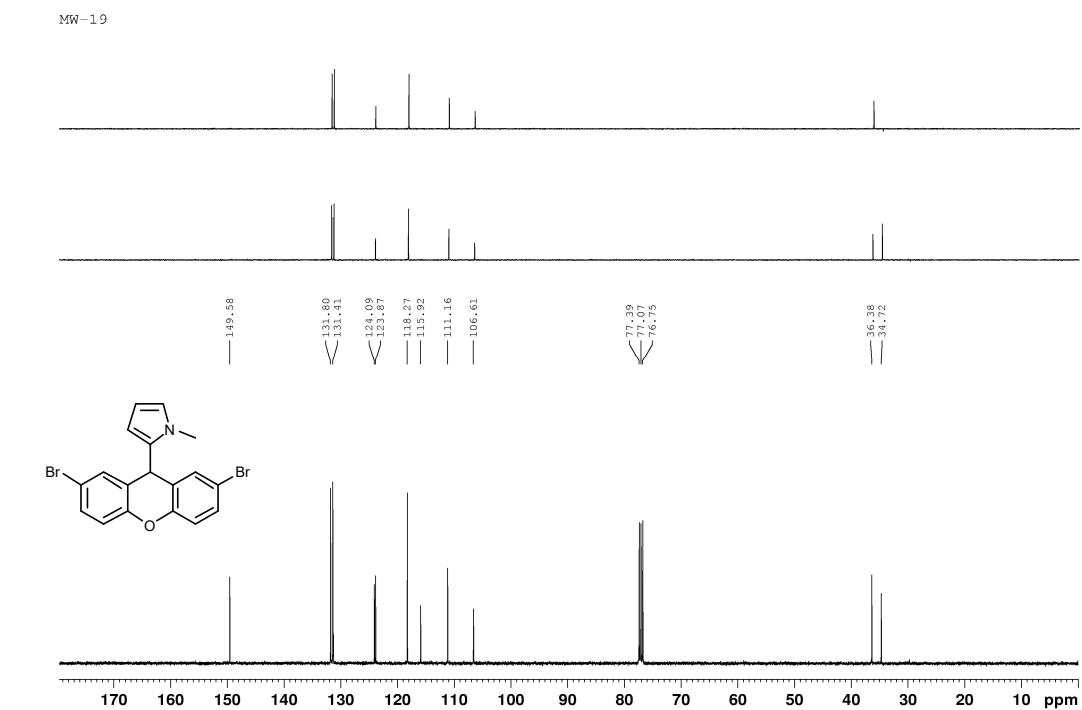

# <sup>1</sup>H-NMR and <sup>13</sup>C-NMR spectral of compound 6f

MW-26

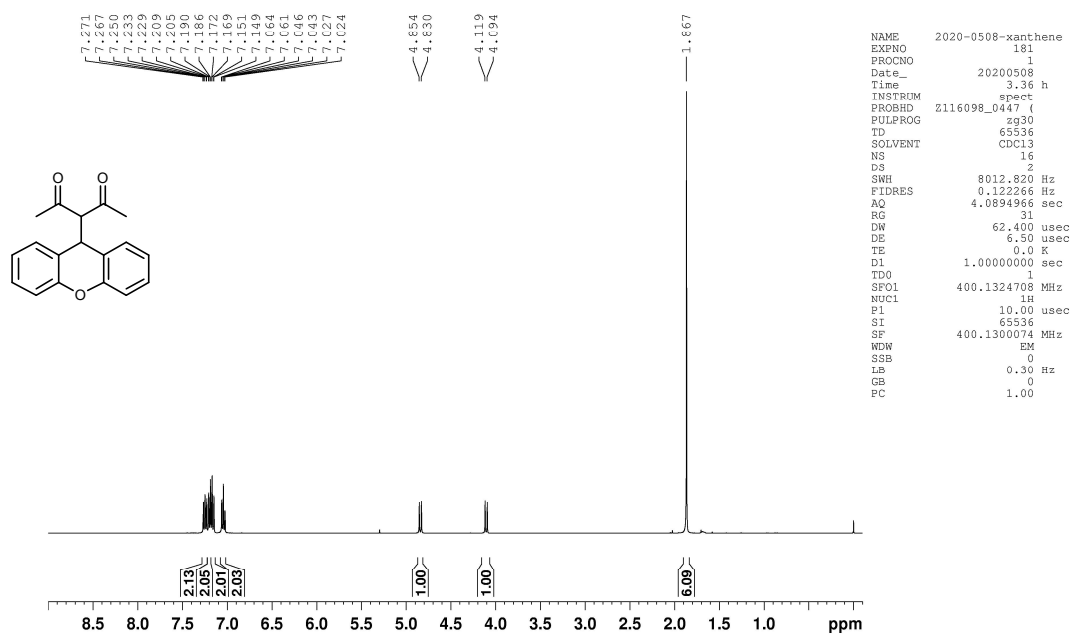

MW-26

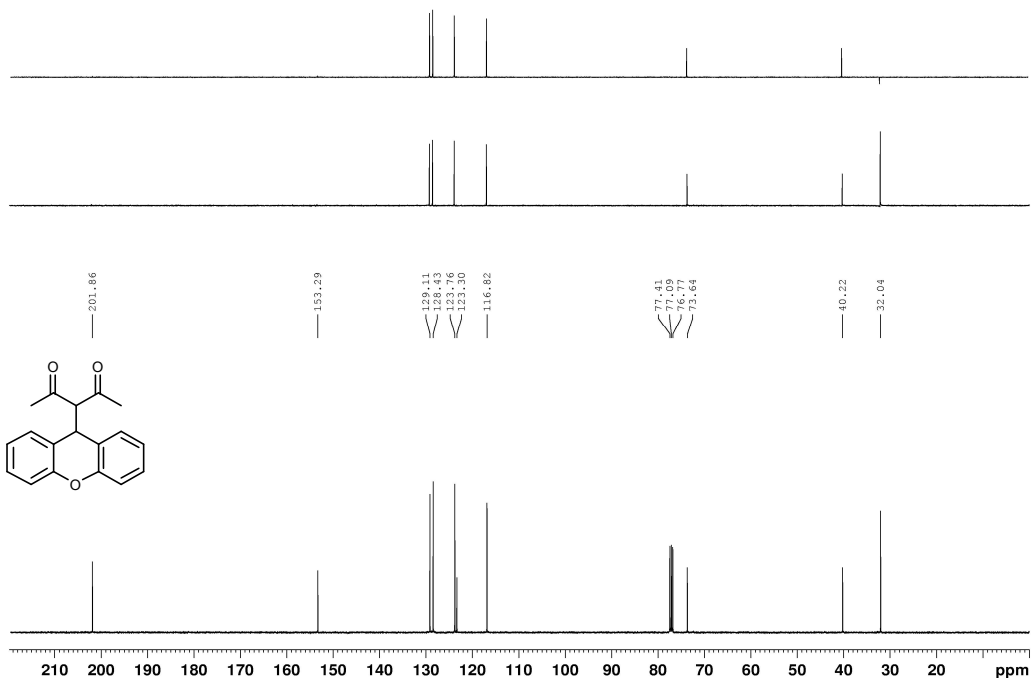

# <sup>1</sup>H-NMR and <sup>13</sup>C-NMR spectral of compound 6g

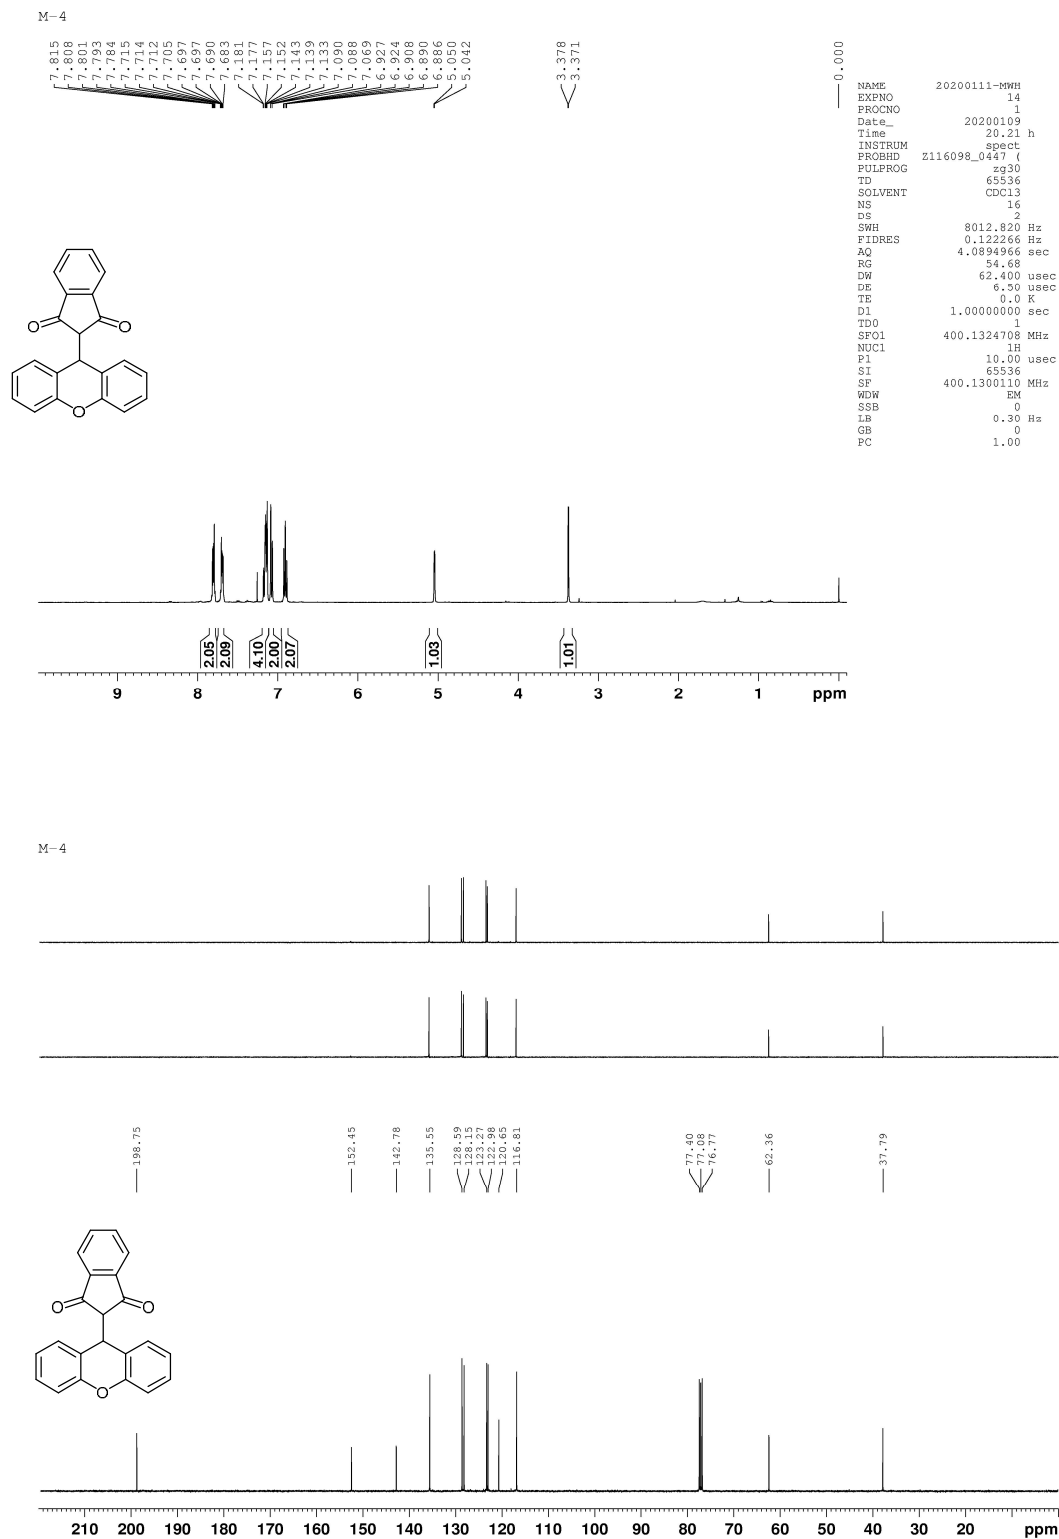

# <sup>1</sup>H-NMR and <sup>13</sup>C-NMR spectral of compound 6h

M-14

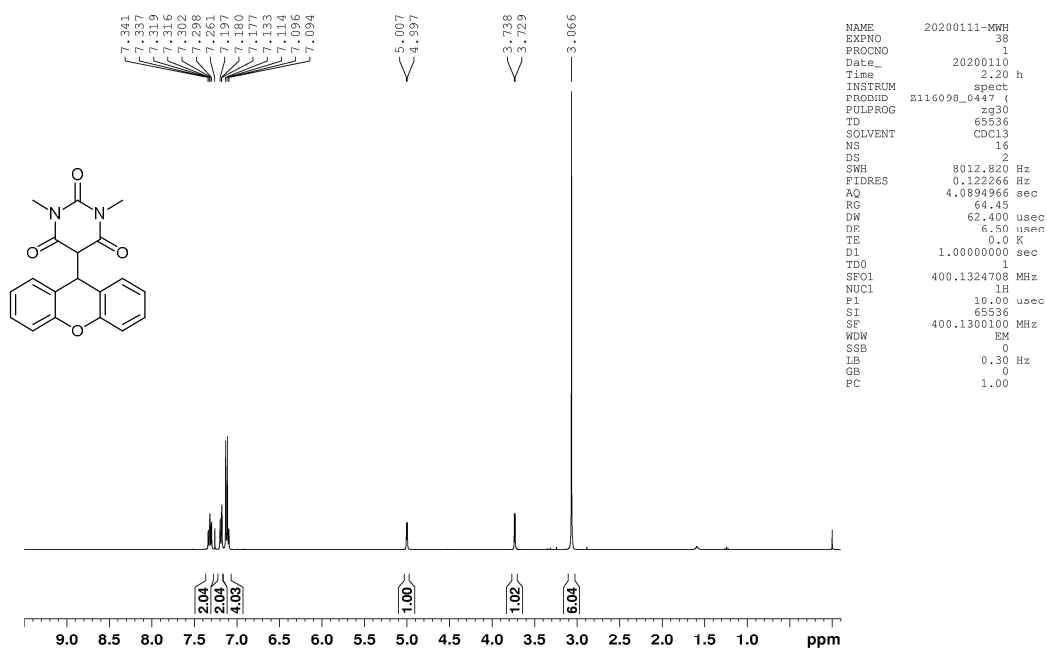

```

NAME      20200111-MWH
EXPNO    38
PROCNO   1
Date_    20200110
Time     2.20 h
INSTRUM  spect
PROBHD   z116098_0447 (
PULPROG  zg30
TD        65536
SOLVENT  CDCl3
NS        16
DS        2
SWH       8012.820 Hz
FIDRES    0.122266 Hz
AQ         4.0894966 sec
RG         64.45
DM         62.400 usec
DE         6.50 usec
TE         0.0 K
D1         1.00000000 sec
TDO        1
SFO1      400.1324708 MHz
NUC1      1H
P1         10.00 usec
SI         65536
SF         400.1300100 MHz
WDW        EM
SSB        0
LB         0.30 Hz
GB         0
PC         1.00
    
```

M-14

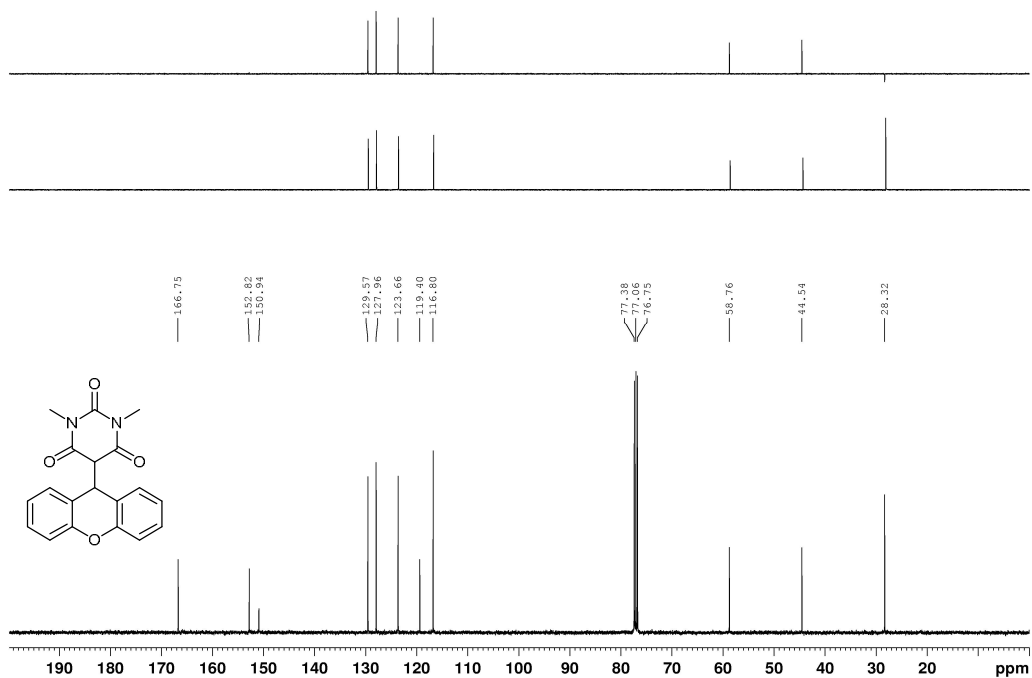

# <sup>1</sup>H-NMR and <sup>13</sup>C-NMR spectral of compound 6i

w-16

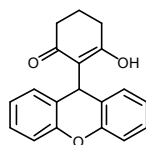

7.141  
7.123  
7.123  
7.079  
6.949  
6.931  
6.912  
5.911  
3.920  
2.357  
1.850  
1.845  
1.850

```

NAME      MW-20200531-YD
EXPNO     21
PROCNO    1
Date_     20200528
Time      13.44 h
INSTRUM   Avance
PROBHD    Z116098_0861 (
PULPROG   zg30
TD         65536
SOLVENT   DMSO
NS         8
DS         0
SWH        5555.556 Hz
FIDRES     0.169542 Hz
AQ          5.8982902 sec
RG          48.7805
DW          90.000 usec
DE          9.46 usec
TE          296.1 K
D1          1.00000000 sec
TD0         1
SF01       400.1321847 MHz
NUC1       1H
PC         3.50 usec
P1         10.50 usec
SI         65536
SF         400.1300000 MHz
WDW        EM
SSB        0
LB         0.30 Hz
GB         0
PC         1.00
    
```

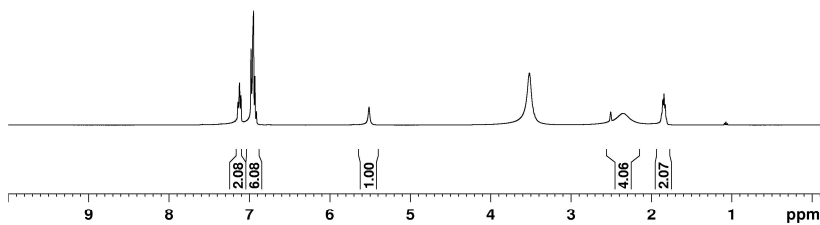

w-16

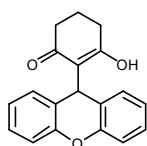

151.41  
128.99  
127.99  
124.85  
123.08  
115.70  
40.52  
40.32  
39.60  
39.60  
39.69  
39.48  
39.27  
30.79  
20.92

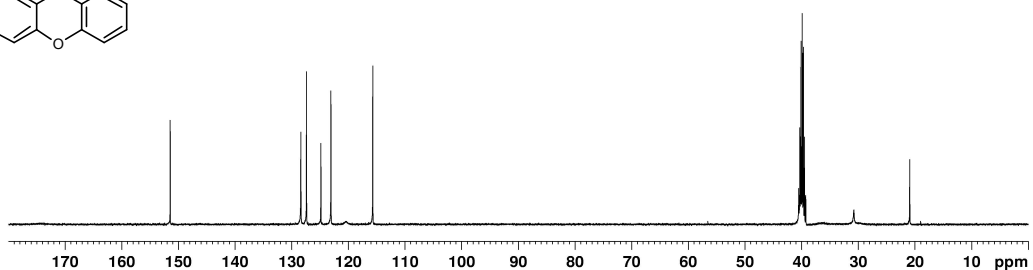

# <sup>1</sup>H-NMR and <sup>13</sup>C-NMR spectral of compound 6j

w-22

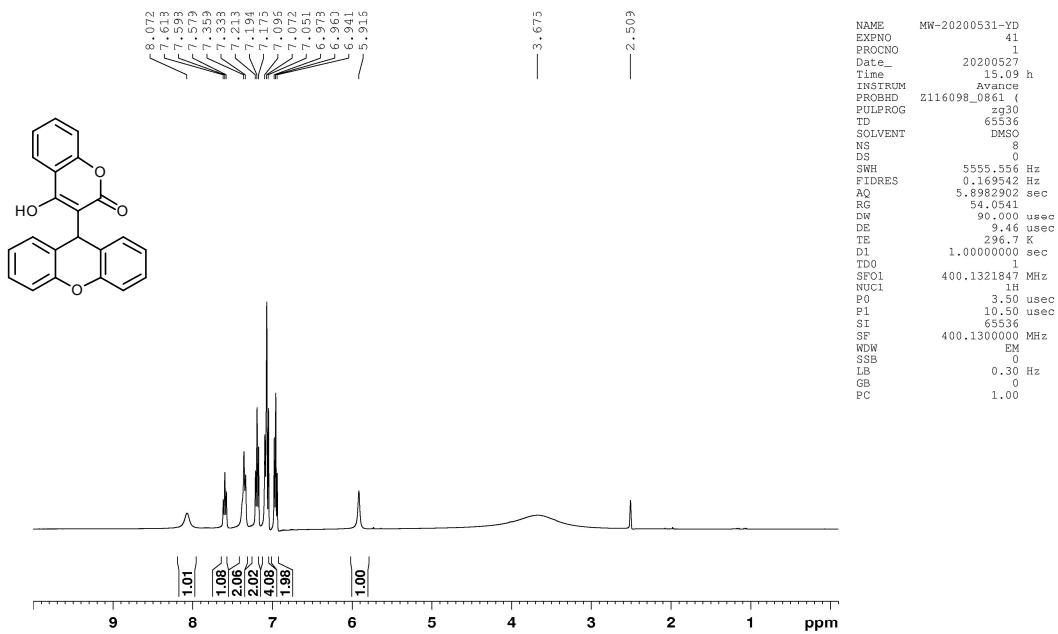

w-22

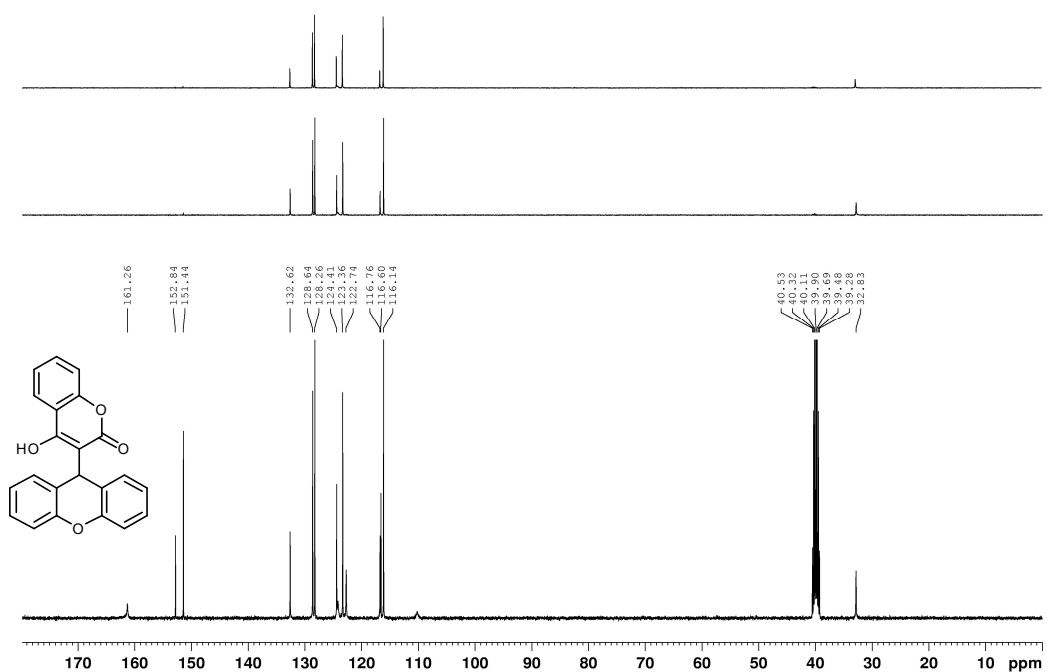

# <sup>1</sup>H-NMR and <sup>13</sup>C-NMR spectral of compound 6k

w-18

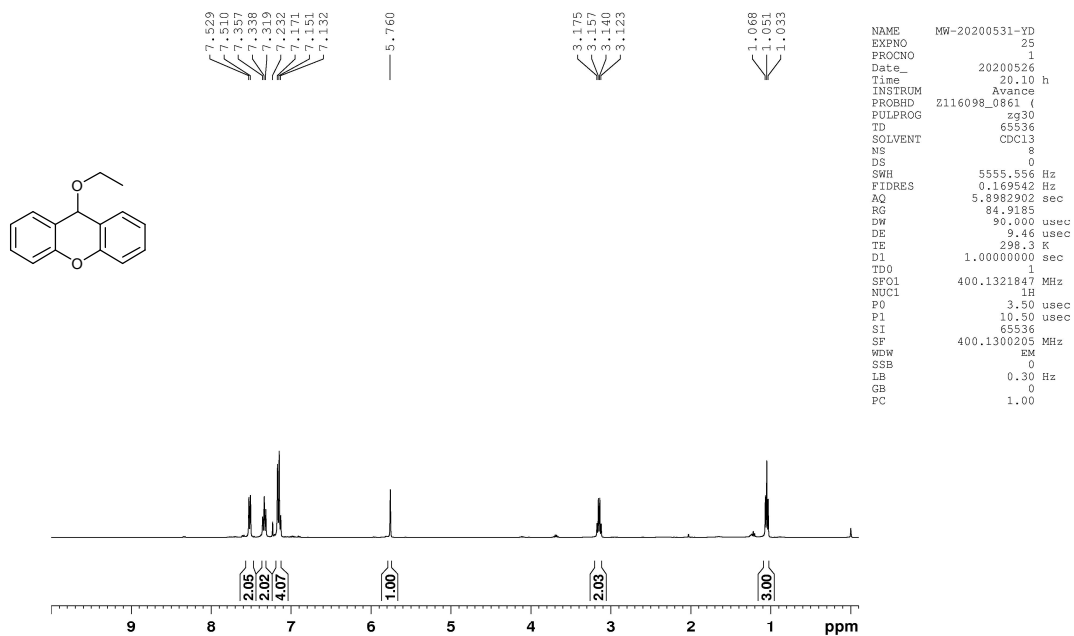

w-18

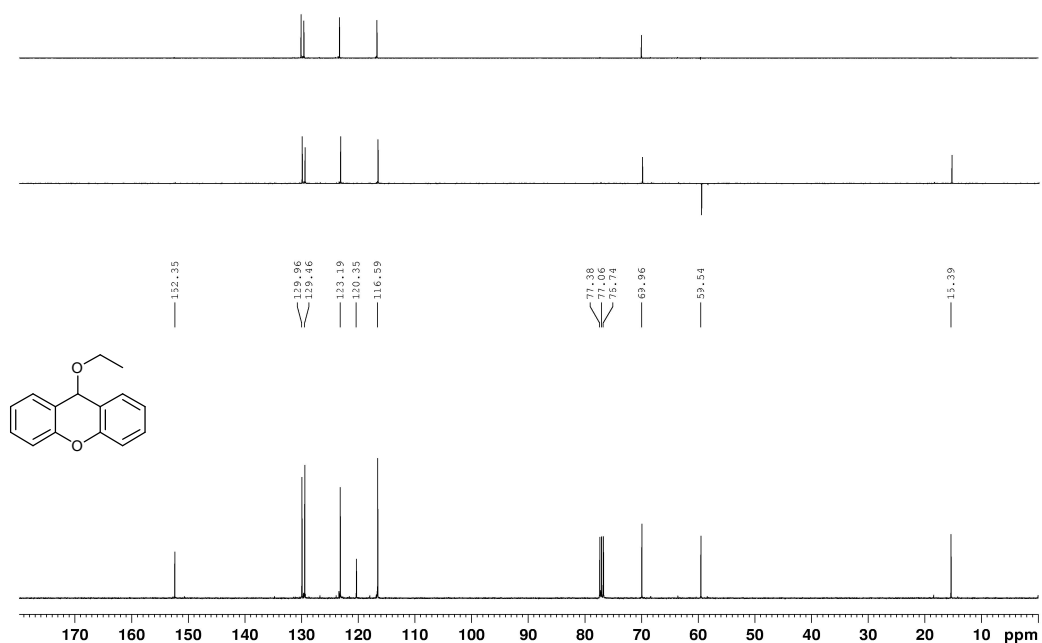



# <sup>1</sup>H-NMR and <sup>13</sup>C-NMR spectral of compound 8b

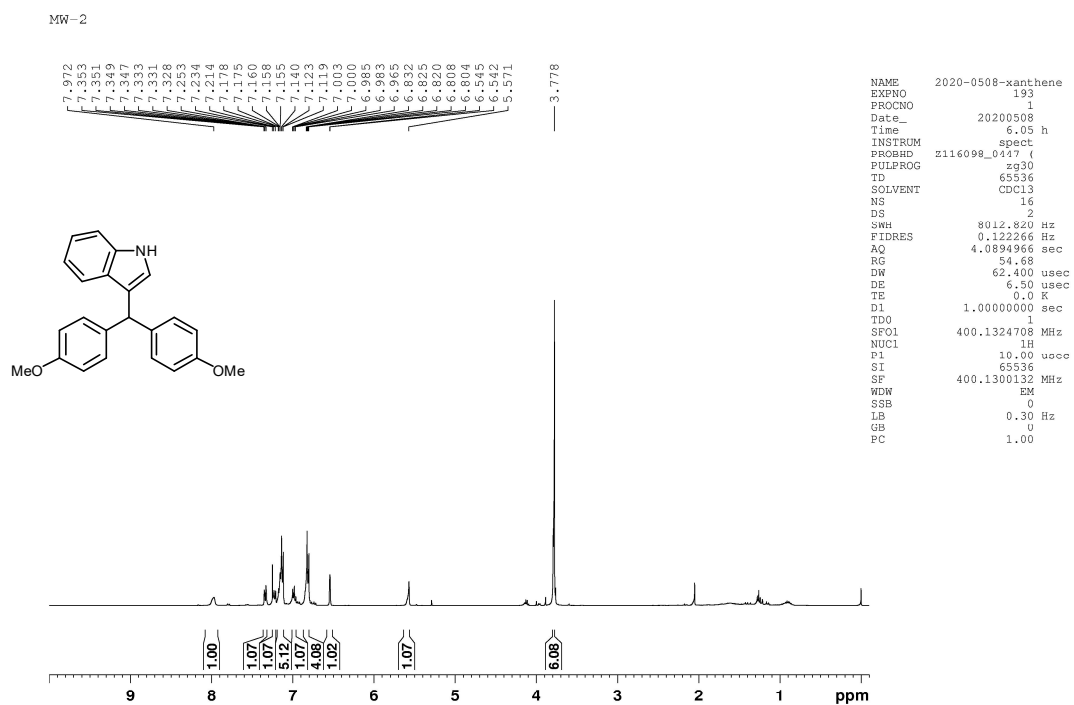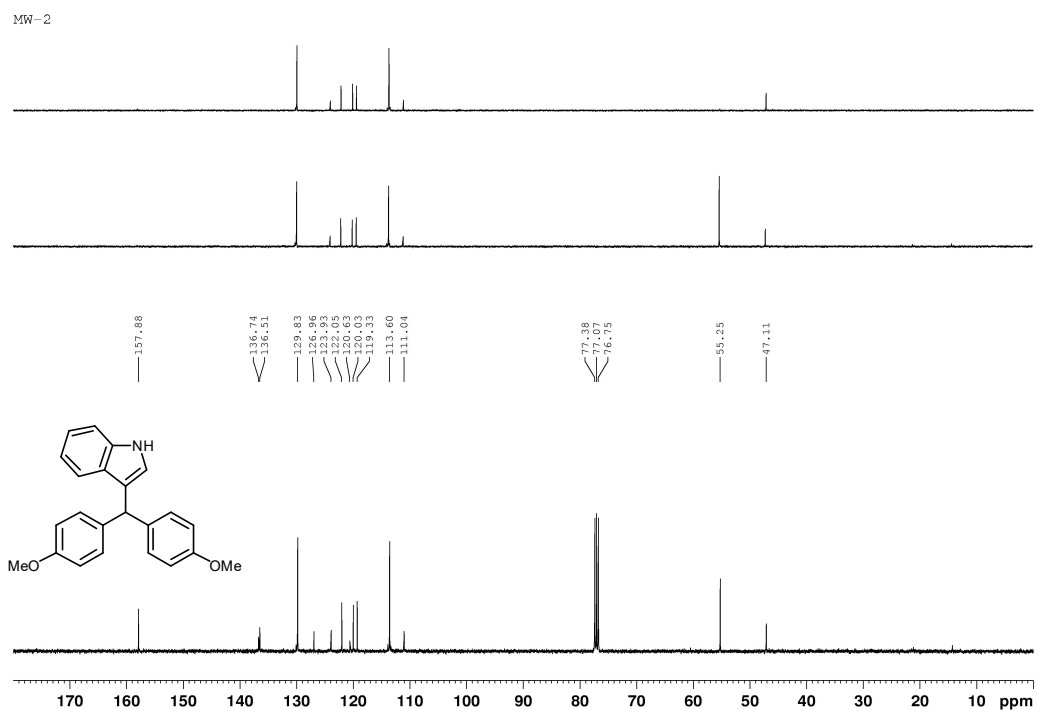

# <sup>1</sup>H-NMR and <sup>13</sup>C-NMR spectral of compound 8c

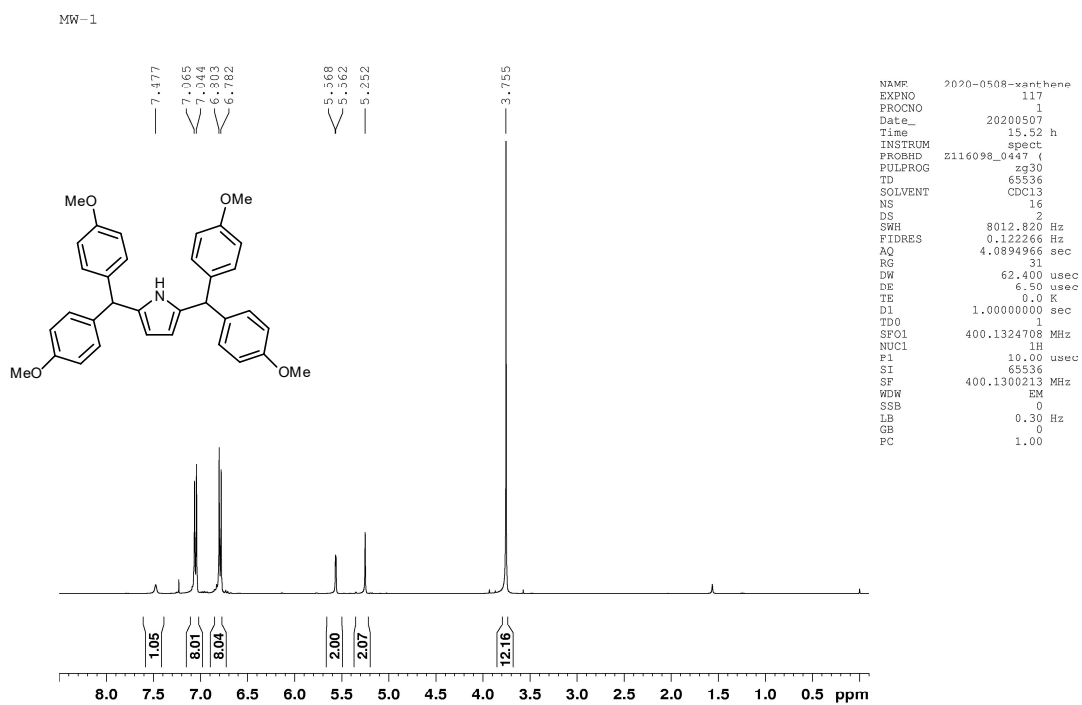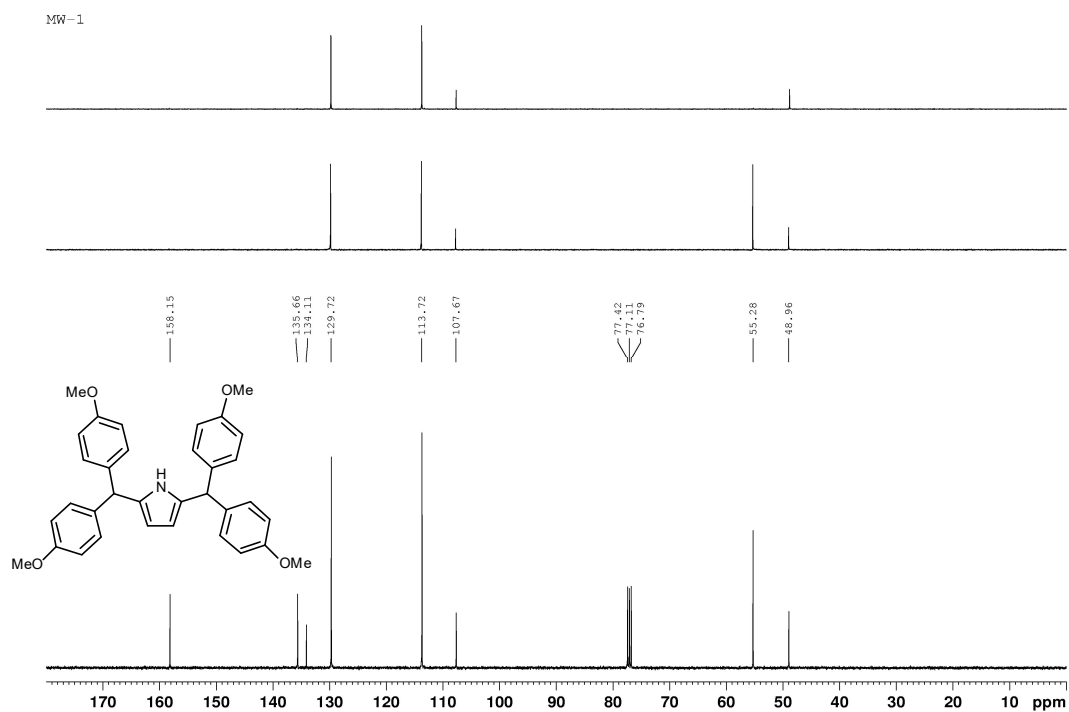

# <sup>1</sup>H-NMR and <sup>13</sup>C-NMR spectral of compound 8d

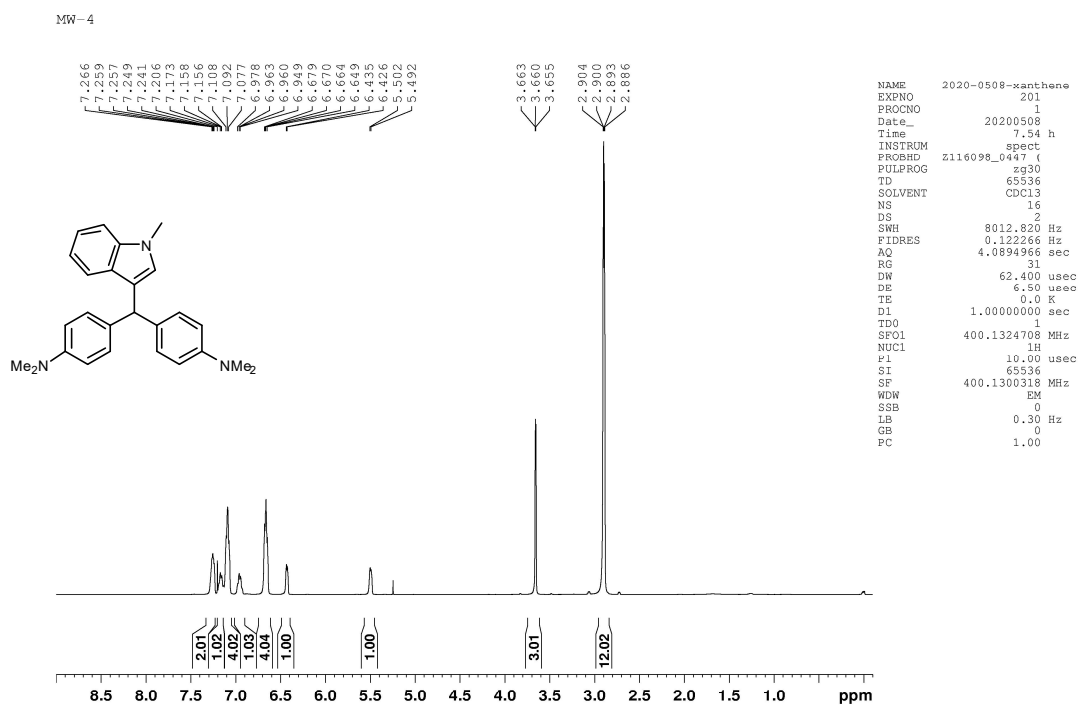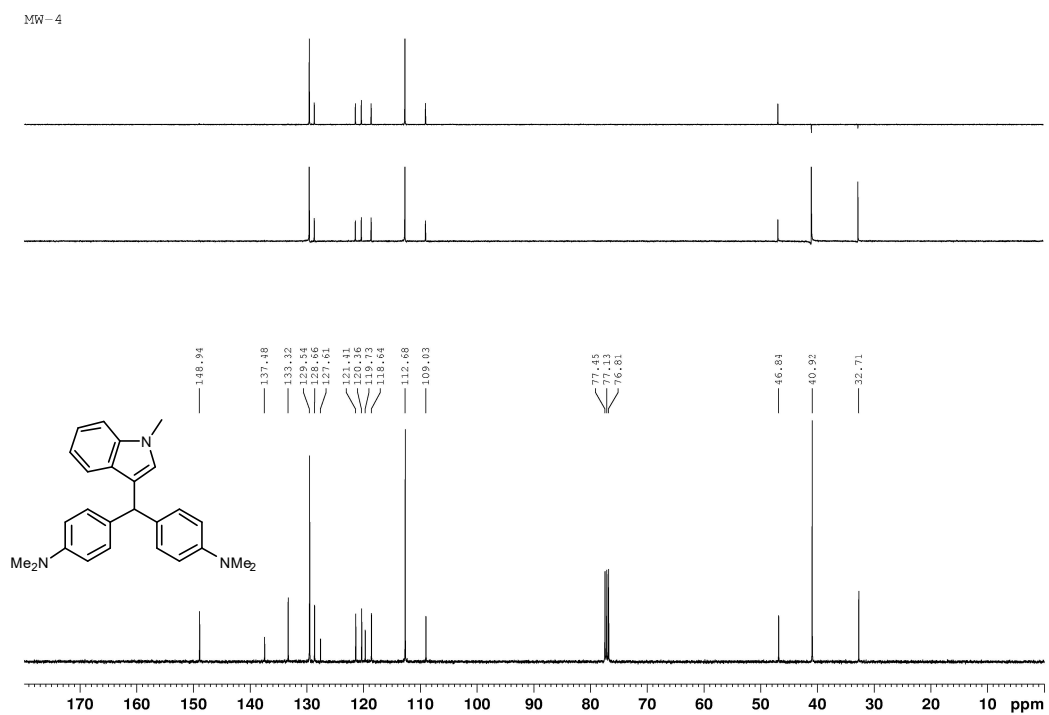

# <sup>1</sup>H-NMR and <sup>13</sup>C-NMR spectral of compound 8e

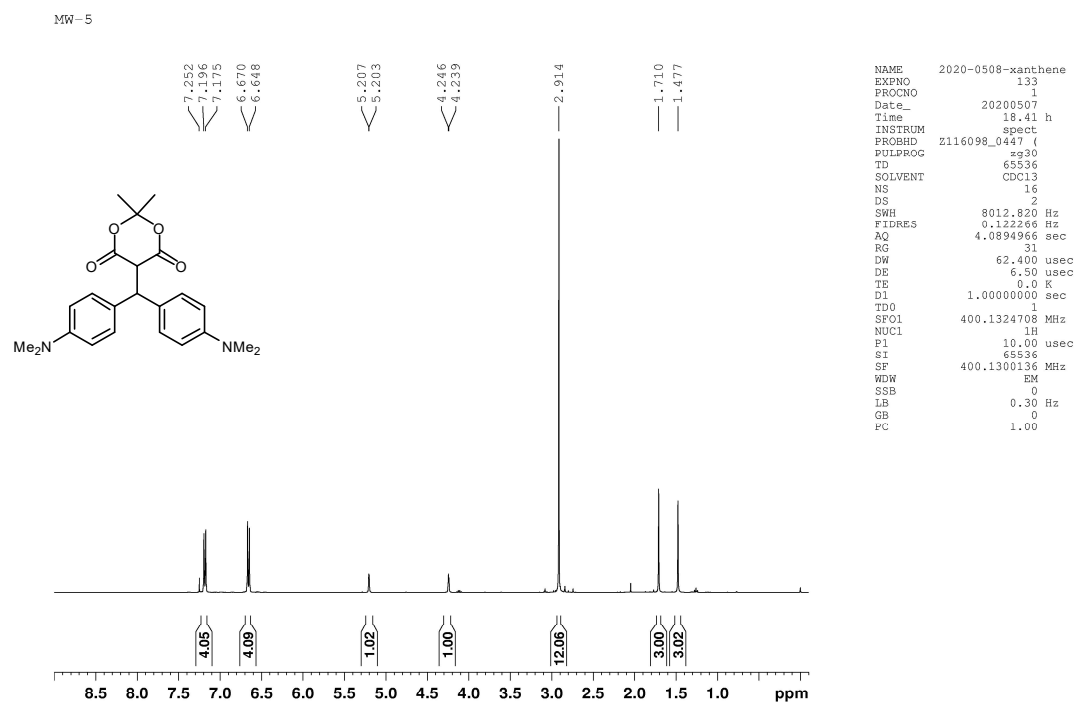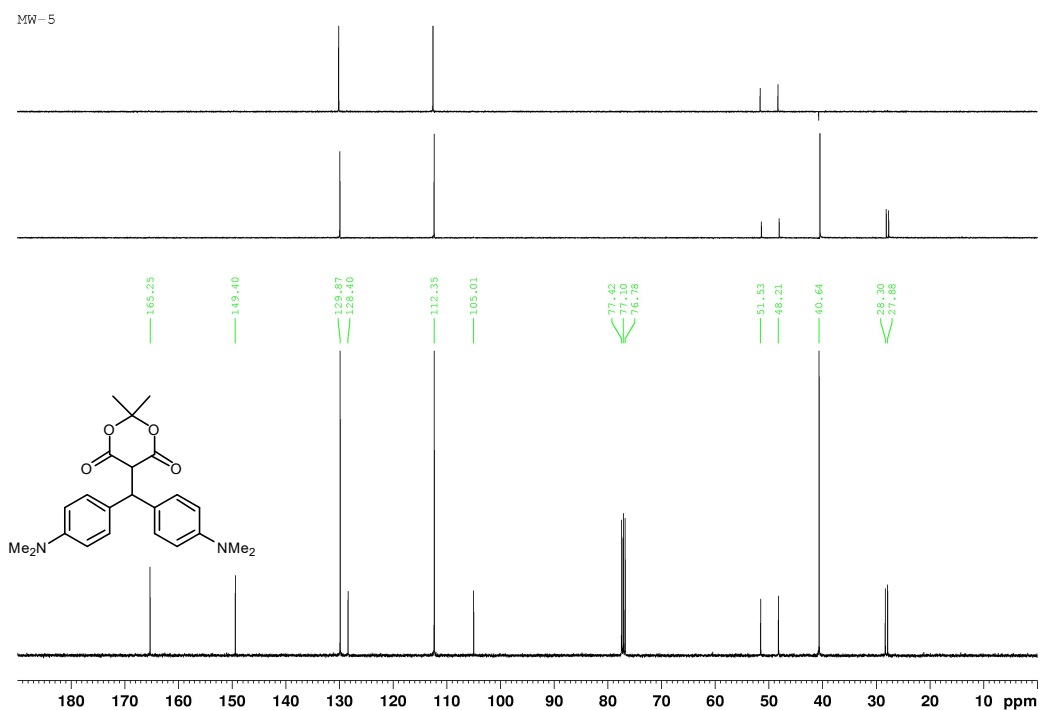

# <sup>1</sup>H-NMR and <sup>13</sup>C-NMR spectral of compound 8f

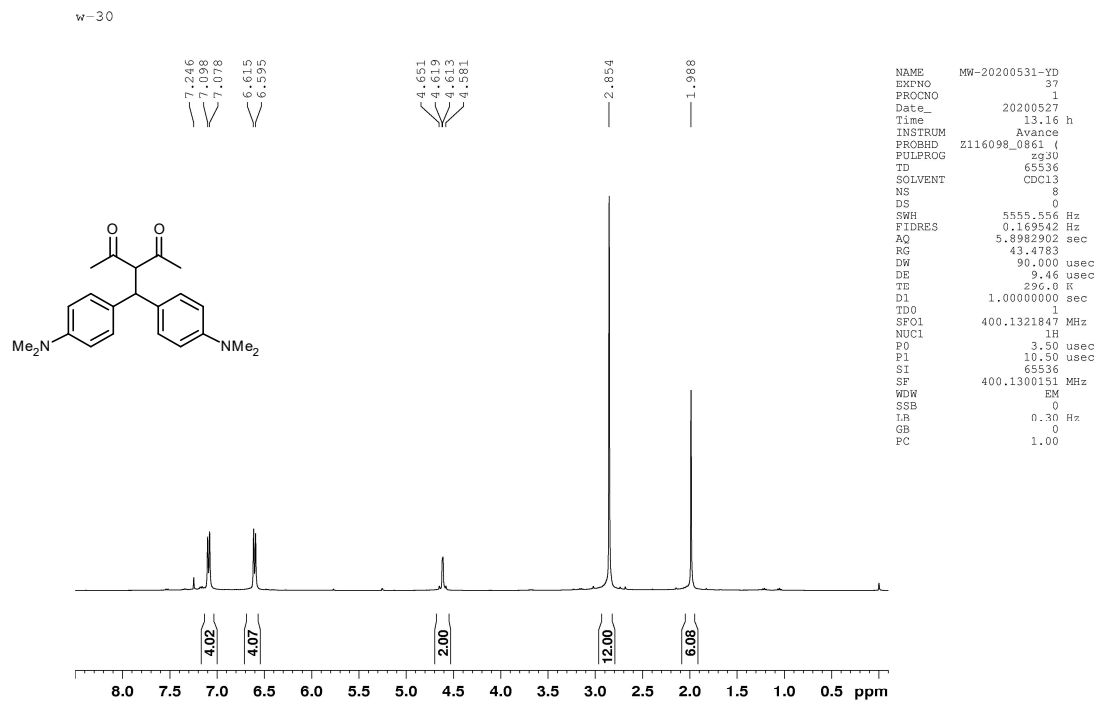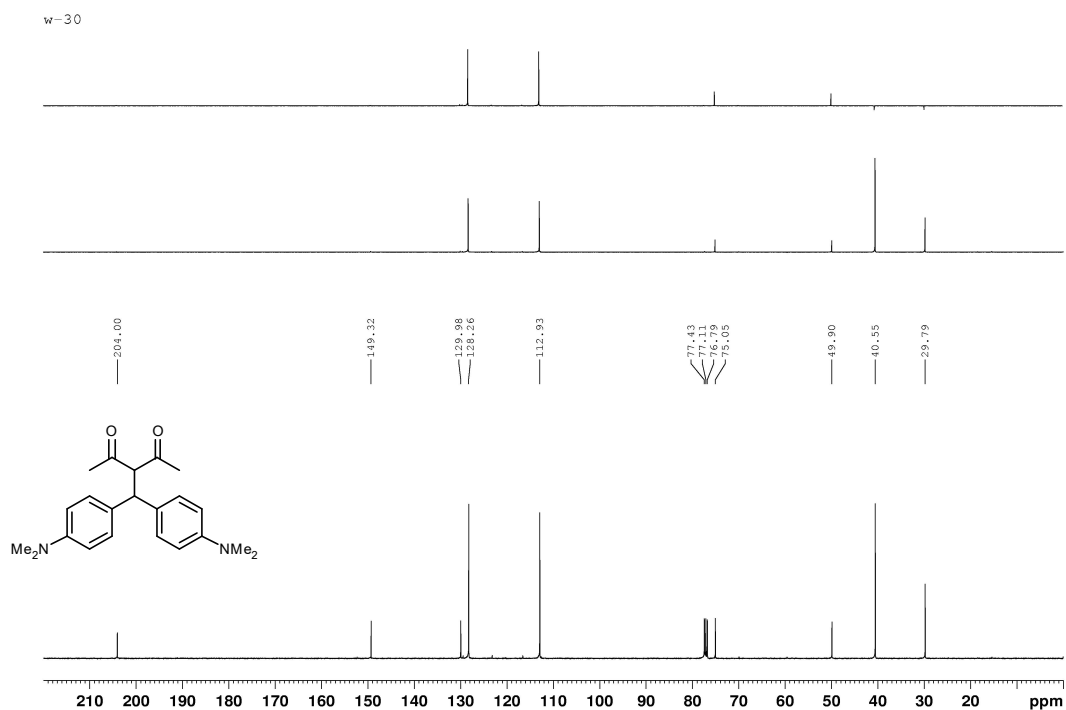

# <sup>1</sup>H-NMR and <sup>13</sup>C-NMR spectral of compound 8g

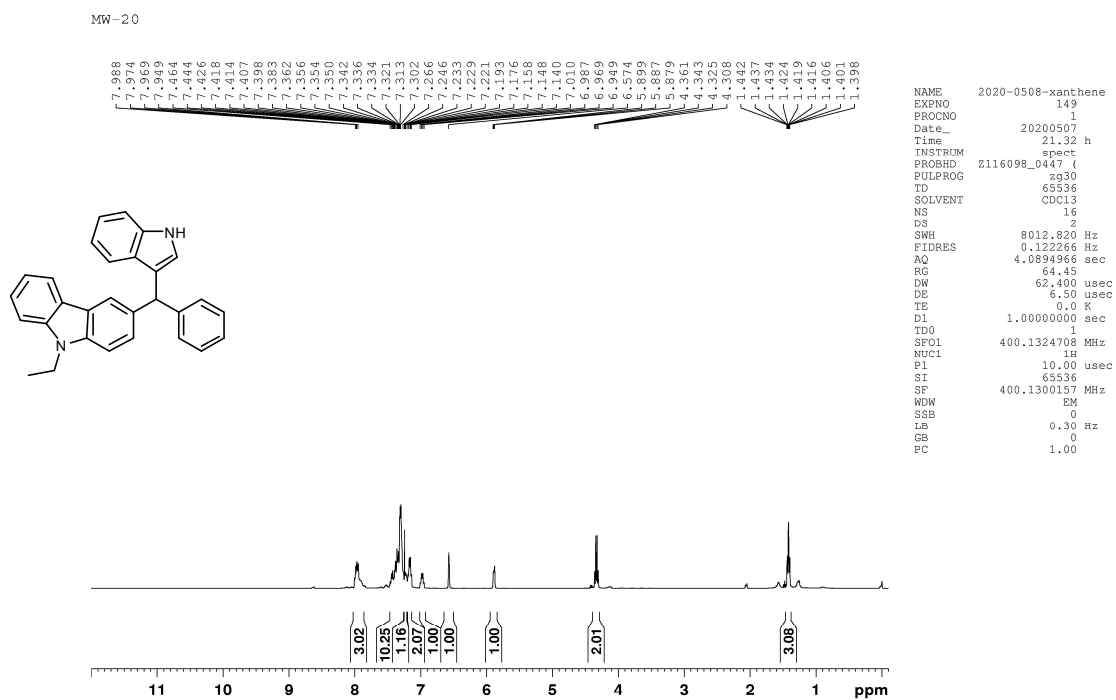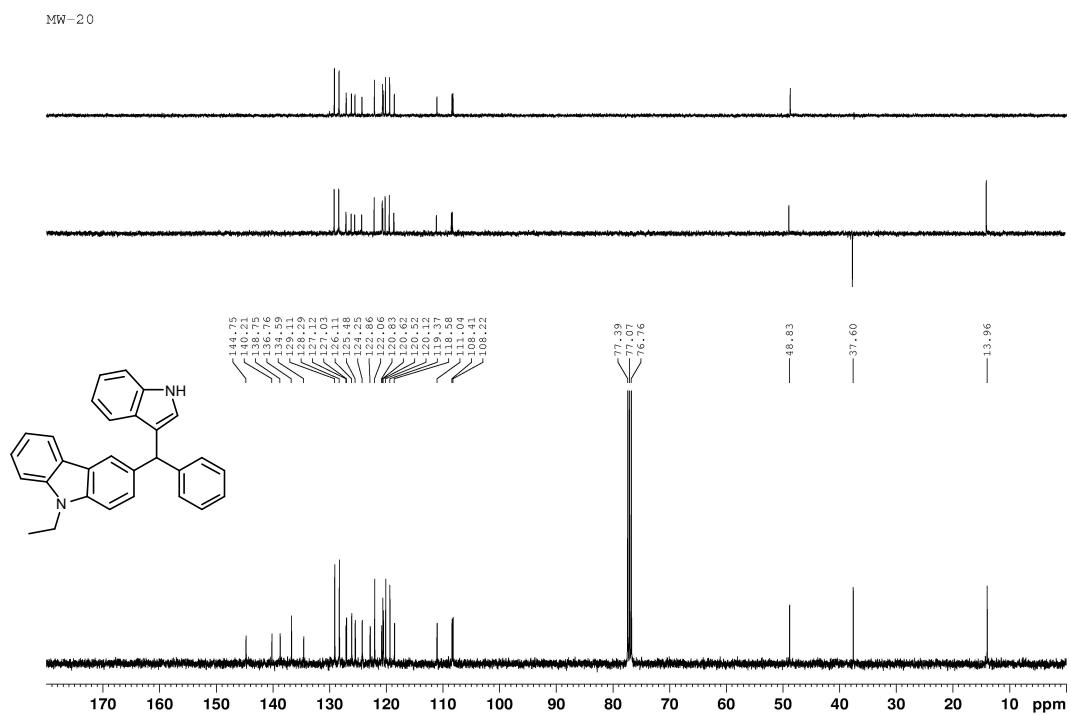

# <sup>1</sup>H-NMR and <sup>13</sup>C-NMR spectral of compound 8h

MW-21

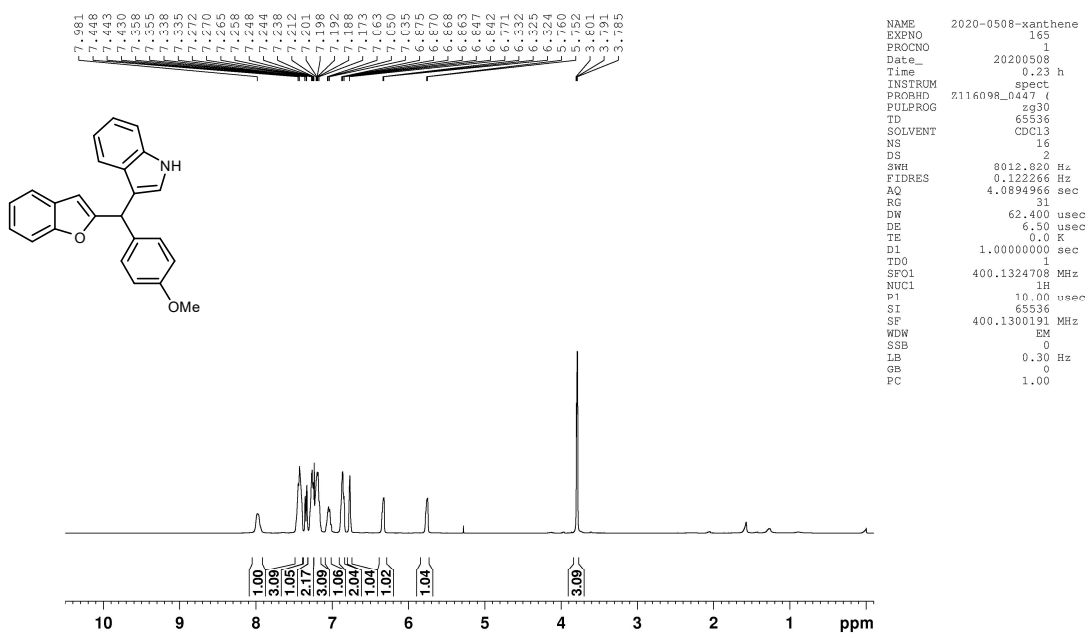

MW-21

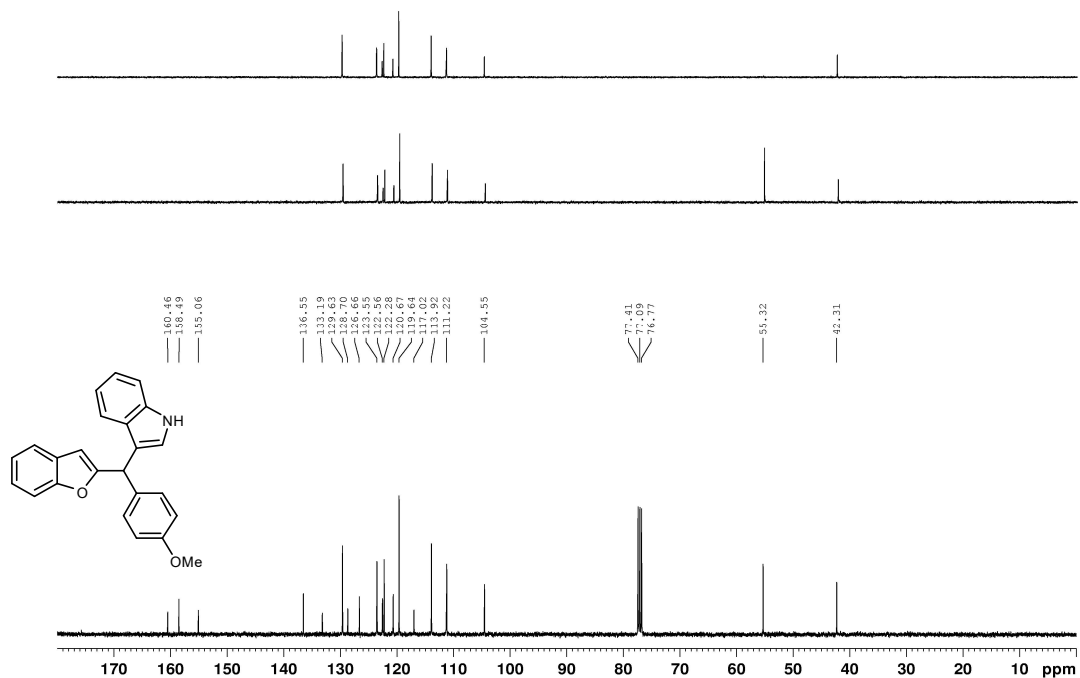

# <sup>1</sup>H-NMR and <sup>13</sup>C-NMR spectral of compound 8i

MW-23

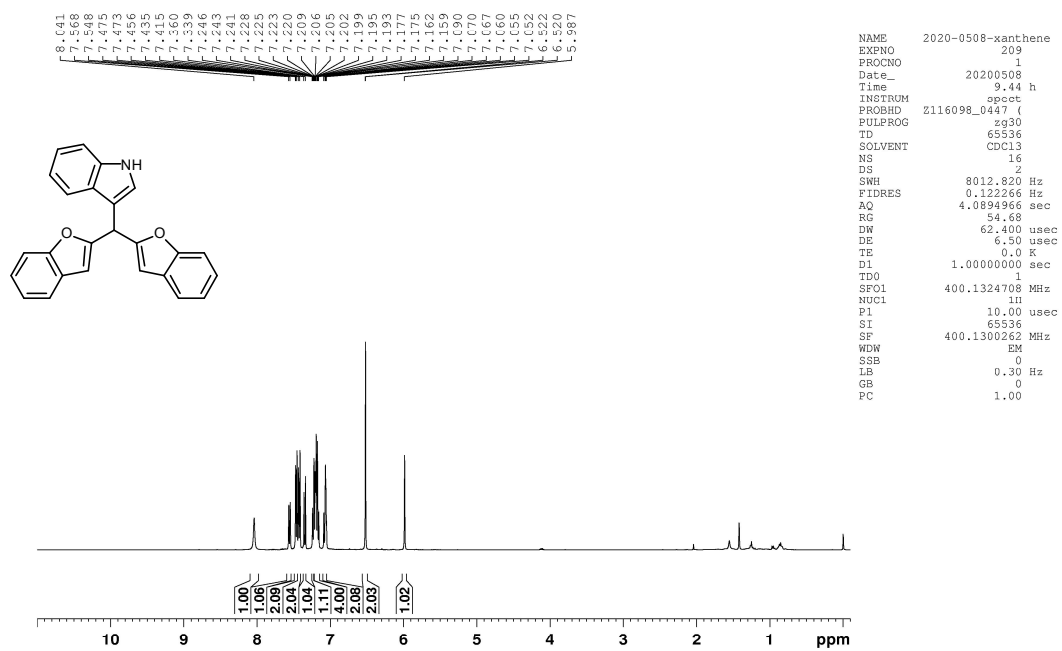

MW-23

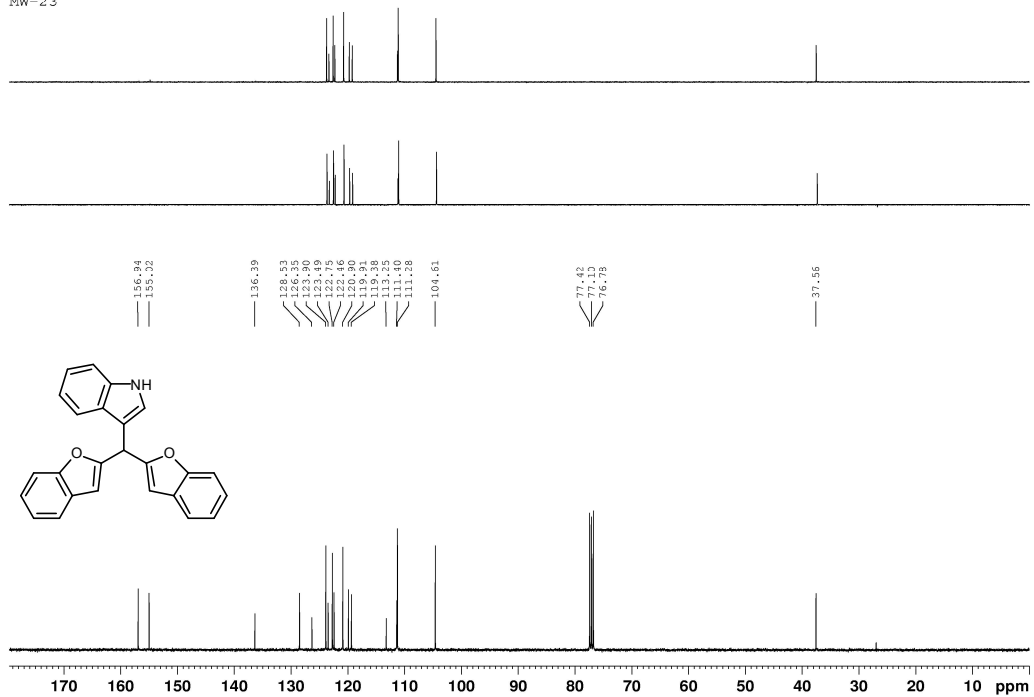



# <sup>1</sup>H-NMR and <sup>13</sup>C-NMR spectral of compound 8j

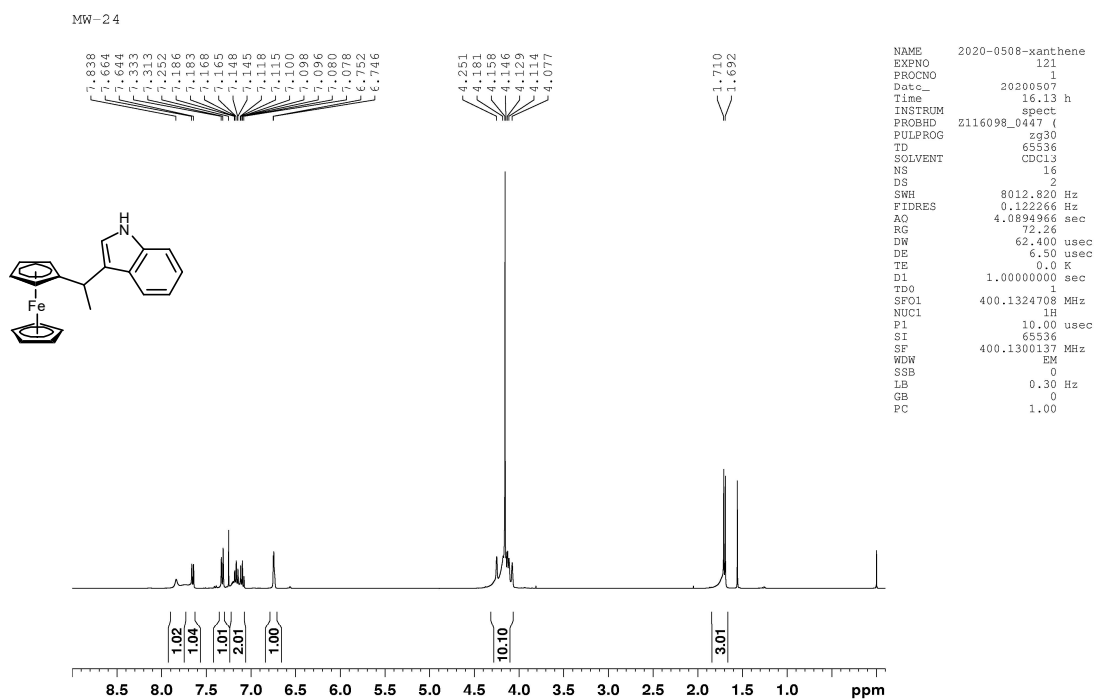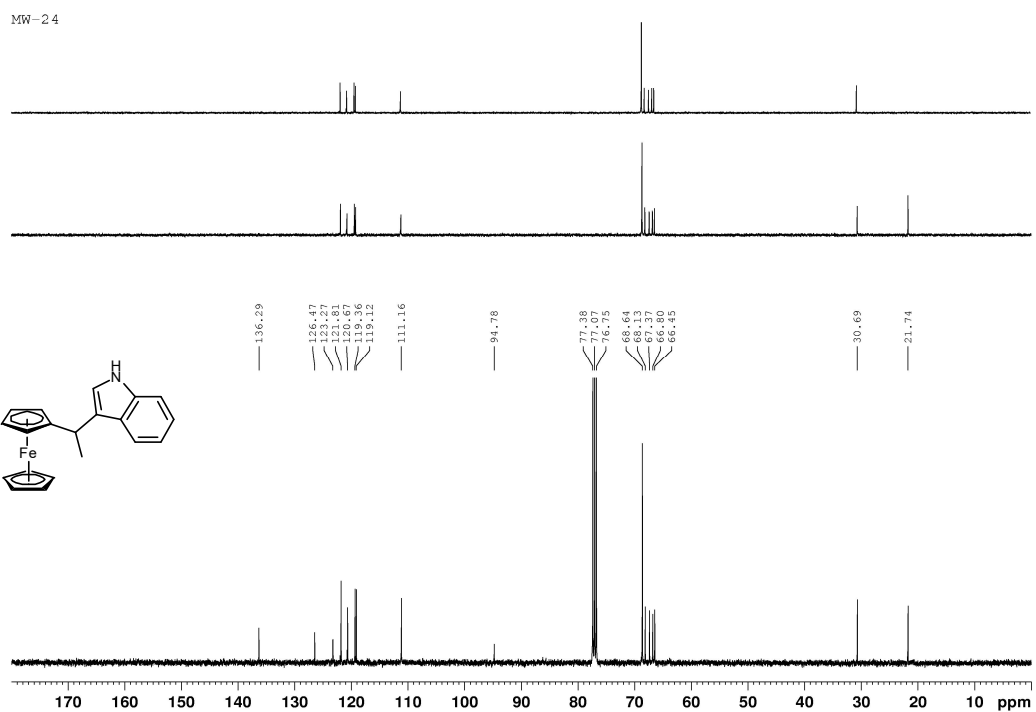

# <sup>1</sup>H-NMR and <sup>13</sup>C-NMR spectral of compound 8k

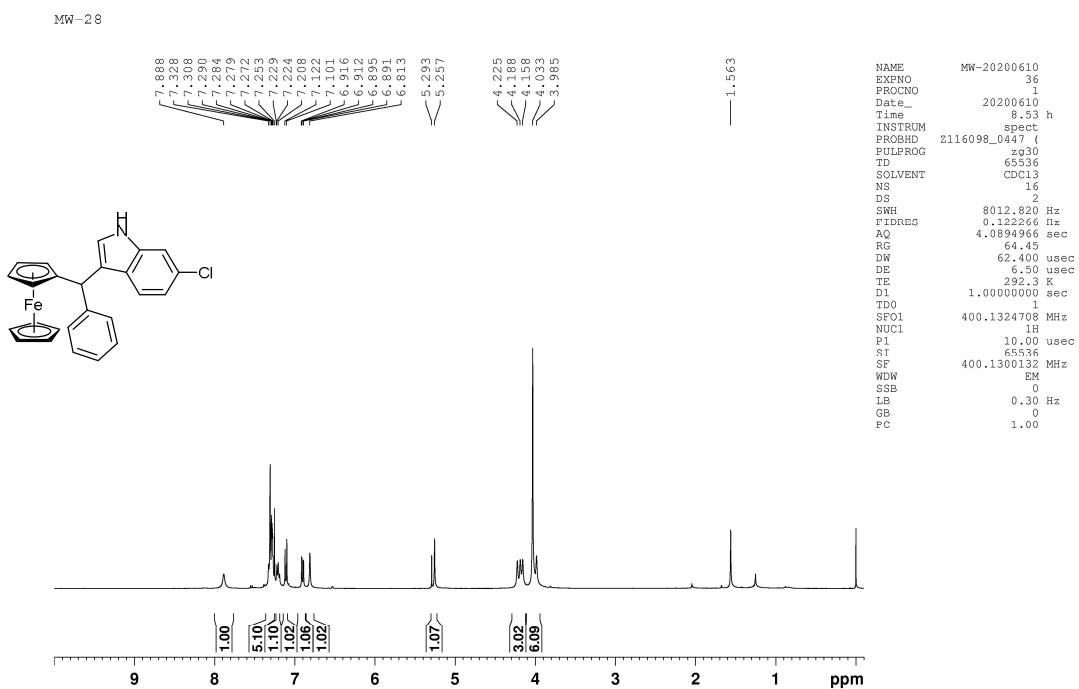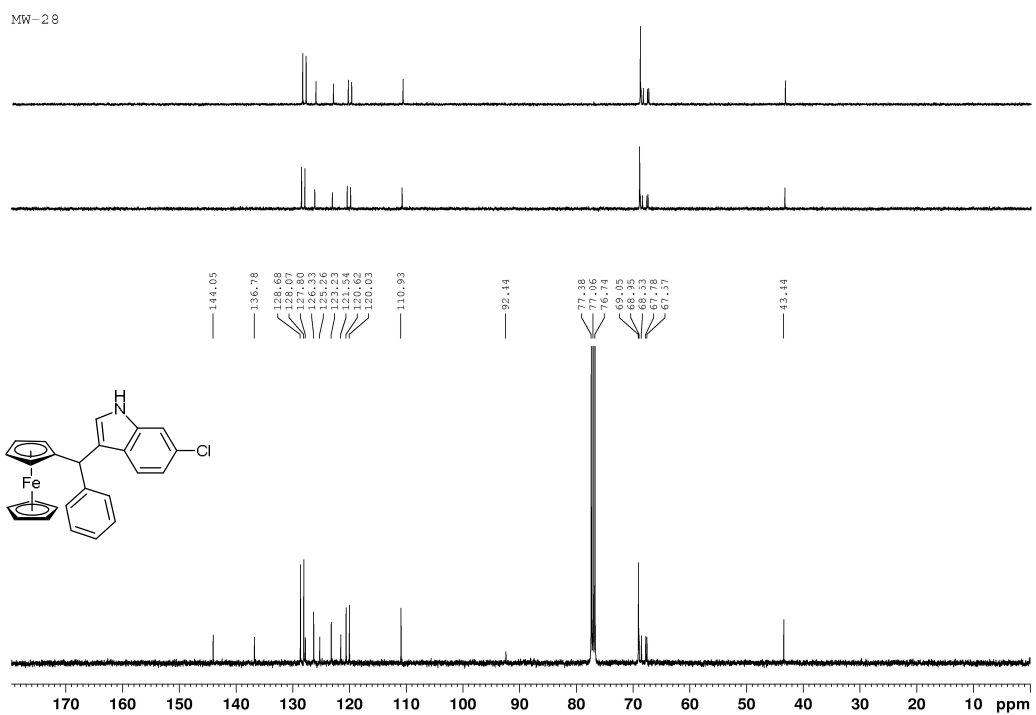

Supplement: RA-010-D0RA05217E-s001.pdf [file RA-010-D0RA05217E-s001.pdf]
